# Supplementary material for: Important food sources of fructose-containing sugars and incident gout: a systematic review and meta-analysis of prospective cohort studies
Source: PubMed Central journal article supplement — BMJ Open. 2019 May 5;9(5):e024171. doi: 10.1136/bmjopen-2018-024171 (PMC6502023; doi:10.1136/bmjopen-2018-024171), 2019-05-05
Supplement: bmjopen-2018-024171.draft_revisions.pdf [file bmjopen-2018-024171.draft_revisions.pdf]

# BMJ Open

BMJ Open is committed to open peer review. As part of this commitment we make the peer review history of every article we publish publicly available.

When an article is published we post the peer reviewers' comments and the authors' responses online. We also post the versions of the paper that were used during peer review. These are the versions that the peer review comments apply to.

The versions of the paper that follow are the versions that were submitted during the peer review process. They are not the versions of record or the final published versions. They should not be cited or distributed as the published version of this manuscript.

BMJ Open is an open access journal and the full, final, typeset and author-corrected version of record of the manuscript is available on our site with no access controls, subscription charges or pay-per-view fees (<http://bmjopen.bmj.com>).

If you have any questions on BMJ Open's open peer review process please email [editorial.bmjopen@bmj.com](mailto:editorial.bmjopen@bmj.com)

# BMJ Open

## Important food sources of fructose-containing sugars and incident gout: A systematic review and meta-analysis of prospective cohort studies

|                               |                                                                                                                                                                                                                                                                                                                                                                                                                                                                                                                                                                                                                                                                                                                                                                                                                                                                                                                                                                                                                                                                                                                                                                                                                                                                                                                                                                                                                                                                                                                                                                                                                                                                                                                                                                                                                                                                                                                                                                                                                                                                                                                                                                                                                                                                                                                                                                                                              |
|-------------------------------|--------------------------------------------------------------------------------------------------------------------------------------------------------------------------------------------------------------------------------------------------------------------------------------------------------------------------------------------------------------------------------------------------------------------------------------------------------------------------------------------------------------------------------------------------------------------------------------------------------------------------------------------------------------------------------------------------------------------------------------------------------------------------------------------------------------------------------------------------------------------------------------------------------------------------------------------------------------------------------------------------------------------------------------------------------------------------------------------------------------------------------------------------------------------------------------------------------------------------------------------------------------------------------------------------------------------------------------------------------------------------------------------------------------------------------------------------------------------------------------------------------------------------------------------------------------------------------------------------------------------------------------------------------------------------------------------------------------------------------------------------------------------------------------------------------------------------------------------------------------------------------------------------------------------------------------------------------------------------------------------------------------------------------------------------------------------------------------------------------------------------------------------------------------------------------------------------------------------------------------------------------------------------------------------------------------------------------------------------------------------------------------------------------------|
| Journal:                      | <i>BMJ Open</i>                                                                                                                                                                                                                                                                                                                                                                                                                                                                                                                                                                                                                                                                                                                                                                                                                                                                                                                                                                                                                                                                                                                                                                                                                                                                                                                                                                                                                                                                                                                                                                                                                                                                                                                                                                                                                                                                                                                                                                                                                                                                                                                                                                                                                                                                                                                                                                                              |
| Manuscript ID                 | bmjopen-2018-024171                                                                                                                                                                                                                                                                                                                                                                                                                                                                                                                                                                                                                                                                                                                                                                                                                                                                                                                                                                                                                                                                                                                                                                                                                                                                                                                                                                                                                                                                                                                                                                                                                                                                                                                                                                                                                                                                                                                                                                                                                                                                                                                                                                                                                                                                                                                                                                                          |
| Article Type:                 | Research                                                                                                                                                                                                                                                                                                                                                                                                                                                                                                                                                                                                                                                                                                                                                                                                                                                                                                                                                                                                                                                                                                                                                                                                                                                                                                                                                                                                                                                                                                                                                                                                                                                                                                                                                                                                                                                                                                                                                                                                                                                                                                                                                                                                                                                                                                                                                                                                     |
| Date Submitted by the Author: | 14-May-2018                                                                                                                                                                                                                                                                                                                                                                                                                                                                                                                                                                                                                                                                                                                                                                                                                                                                                                                                                                                                                                                                                                                                                                                                                                                                                                                                                                                                                                                                                                                                                                                                                                                                                                                                                                                                                                                                                                                                                                                                                                                                                                                                                                                                                                                                                                                                                                                                  |
| Complete List of Authors:     | <p>Ayoub-Charette, Sabrina; Toronto 3D Knowledge Synthesis and Clinical Trials Unit, Clinical Nutrition and Risk Factor Modification Centre, St. Michael's Hospital, Toronto, Ontario, Canada; Department of Nutritional Sciences, Faculty of Medicine, University of Toronto, Toronto, Ontario, Canada</p> <p>Liu, Qi; Toronto 3D Knowledge Synthesis and Clinical Trials Unit, Clinical Nutrition and Risk Factor Modification Centre, St. Michael's Hospital, Toronto, Ontario, Canada; Department of Nutritional Sciences, Faculty of Medicine, University of Toronto, Toronto, Ontario, Canada</p> <p>Khan, Tauseef ; Toronto 3D Knowledge Synthesis and Clinical Trials Unit, Clinical Nutrition and Risk Factor Modification Centre, St. Michael's Hospital, Toronto, Ontario, Canada; Department of Nutritional Sciences, Faculty of Medicine, University of Toronto, Toronto, Ontario, Canada</p> <p>Au-Yeung, Fei; Toronto 3D Knowledge Synthesis and Clinical Trials Unit, Clinical Nutrition and Risk Factor Modification Centre, St. Michael's Hospital, Toronto, Ontario, Canada; Department of Nutritional Sciences, Faculty of Medicine, University of Toronto, Toronto, Ontario, Canada</p> <p>Blanco Mejia, Sonia; Clinical Nutrition and Risk Factor Modification Centre, St. Michael's Hospital; Toronto 3D Knowledge Synthesis and Clinical Trials Unit, St. Michael's Hospital</p> <p>de Souza, Russell; Toronto 3D Knowledge Synthesis and Clinical Trials Unit, Clinical Nutrition and Risk Factor Modification Centre, St. Michael's Hospital, Toronto, Ontario, Canada; McMaster University, Department of Health Research Methods, Evidence, and Impact, Hamilton, Ontario, Canada</p> <p>Wolever, Thomas M. S.; Department of Nutritional Sciences, Faculty of Medicine, University of Toronto, Toronto, Ontario, Canada; Division of Endocrinology and Metabolism, St. Michael's Hospital, Toronto, Ontario, Canada</p> <p>Leiter, Lawrence; Division of Endocrinology and Metabolism, St. Michael's Hospital, Toronto, Ontario, Canada; Li Ka Shing Knowledge Institute, St. Michael's Hospital, Toronto, Ontario, Canada</p> <p>Kendall, Cyril; University of Toronto, Nutritional Sciences</p> <p>Sievenpiper, John; McMaster University, Department of Pathology and Molecular Medicine; St. Michael's Hospital, Clinical Nutrition and Risk Factor Modification Centre</p> |
| Keywords:                     | uric acid, systematic review and meta-analysis, gout, sugars, fructose, food sources of fructose containing sugars                                                                                                                                                                                                                                                                                                                                                                                                                                                                                                                                                                                                                                                                                                                                                                                                                                                                                                                                                                                                                                                                                                                                                                                                                                                                                                                                                                                                                                                                                                                                                                                                                                                                                                                                                                                                                                                                                                                                                                                                                                                                                                                                                                                                                                                                                           |

1  
2  
3  
4  
5  
6  
7  
8  
9  
10  
11  
12  
13  
14  
15  
16  
17  
18  
19  
20  
21  
22  
23  
24  
25  
26  
27  
28  
29  
30  
31  
32  
33  
34  
35  
36  
37  
38  
39  
40  
41  
42  
43  
44  
45  
46  
47  
48  
49  
50  
51  
52  
53  
54  
55  
56  
57  
58  
59  
60

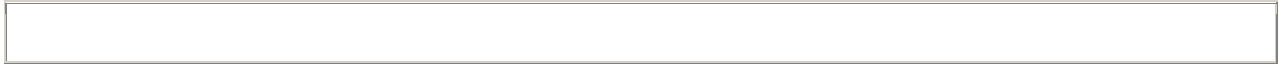

SCHOLARONE™  
Manuscripts

For peer review only

1  
2 1 **Important food sources of fructose-containing sugars and incident gout:**  
3 2 **A systematic review and meta-analysis of prospective cohort studies**  
4 3  
5 4  
6 4  
7

8 5 **Sabrina Ayoub-Charette<sup>1,2</sup>, Qi Liu<sup>1,2</sup>, Tauseef Ahmad Khan<sup>1,2</sup>, Fei Au-Yeung<sup>1,2</sup>, Sonia Blanco Mejia<sup>1,2</sup>,**  
9  
10 6 **Russell J de Souza<sup>1,2,4</sup>, Thomas MS Wolever<sup>1,2,3,5</sup>, Lawrence A Leiter<sup>1,2,3,5</sup>, Cyril WC Kendall<sup>1,2,6</sup>, John L.**  
11  
12 7 **Sievenpiper<sup>1,2,3,5</sup>**

13 8  
14 8  
15 9  
16 9  
17 10 <sup>1</sup>Toronto 3D Knowledge Synthesis and Clinical Trials Unit, Clinical Nutrition and Risk Factor  
18  
19 11 Modification Centre, St. Michael's Hospital, Toronto, Ontario, Canada, <sup>2</sup>Department of Nutritional  
20  
21 12 Sciences, Faculty of Medicine, University of Toronto, Toronto, Ontario, Canada, <sup>3</sup>Division of  
22  
23 13 Endocrinology and Metabolism, St. Michael's Hospital, Toronto, Ontario, Canada, <sup>4</sup>McMaster  
24  
25 14 University, Department of Health Research Methods, Evidence, and Impact, Hamilton, Ontario,  
26  
27 15 Canada, <sup>5</sup>Li Ka Shing Knowledge Institute, St. Michael's Hospital, Toronto, Ontario, Canada, <sup>6</sup>College  
28  
29 16 of Pharmacy and Nutrition, University of Saskatchewan, Saskatoon, Saskatchewan, Canada.  
30  
31  
32 18  
33  
34 19  
35  
36 20  
37  
38 21  
39  
40  
41 23  
42

43 24 **Corresponding Author:**

44  
45 25 John L Sievenpiper MD, PhD, FRCPC, Toronto 3D Knowledge Synthesis and Clinical Trials Unit, St.  
46 26 Michael's Hospital, 6137-61 Queen Street East, Toronto, ON, M5C 2T2, CANADA, Tel: +1-416 867-  
47 27 3732, Fax: 416 867 7495, email: [john.sievenpiper@utoronto.ca](mailto:john.sievenpiper@utoronto.ca)  
48  
49 28

50 29 **Number of Figures:** 2

51 30 **Number of Tables:** 2

52 31 **Supplemental Material:** 3 Tables and 2 Figures

53 32 **Abstract Word Count:** 295

54 33 **Manuscript Word Count:** 4,630

55 34 **Key Words:** sugars, fructose, food sources of fructose containing sugars, gout, uric acid and  
56 35 systematic review and meta-analysis  
57  
58  
59

1  
2 36 **ABSTRACT**

3  
4 37 **Objective:** Sugar-sweetened beverages (SSBs) are associated with hyperuricemia and gout. Whether  
5  
6  
7 38 other important food sources of sugars share this association is unclear.

8  
9 39 **Design:** To assess the relation of important food-sources of fructose-containing sugars with incident  
10  
11  
12 40 gout and hyperuricemia, we conducted a systematic review and meta-analysis of prospective cohort  
13  
14 41 studies.

15  
16 42 **Methods:** We searched MEDLINE, EMBASE and the Cochrane Library (through September 13, 2017).  
17  
18  
19 43 We included prospective cohort studies that investigated the relationship between food sources of  
20  
21  
22 44 sugar and incident gout or hyperuricemia. Two independent reviewers extracted relevant data and  
23  
24 45 assessed risk of bias. We pooled natural-log transformed risk ratios (RRs) using the generic inverse  
25  
26 46 variance method with random effects model and expressed as RR with 95% confidence intervals (CIs).  
27  
28  
29 47 The overall certainty of the evidence was assessed using the Grading of Recommendations  
30  
31 48 Assessment, Development and Evaluation (GRADE) system.

32  
33  
34 49 **Results:** We identified three studies (154,289 participants, 1,761 cases of gout), comparing the  
35  
36 50 highest with the lowest level of exposure for SSBs, fruit juice and fruits. No reports were found  
37  
38  
39 51 reporting incident hyperuricemia. Fruit juice and SSB intake showed an adverse association (fruit  
40  
41 52 juice, RR = 1.76, 95% CI 1.19 to 2.60; SSB, RR = 2.07, 95% CI 1.40 to 3.06), when comparing the highest  
42  
43  
44 53 to lowest intake of the most adjusted models. There was no significant association between fruit  
45  
46 54 intake and gout (RR 0.82, 95% CI 0.61 to 1.11). Strongest evidence was for the adverse association in  
47  
48 55 SSB (moderate quality), and the weakest evidence was for the adverse association in fruit juice (very  
49  
50  
51 56 low quality) and the no effect in fruit intake (very low quality).

52  
53 57 **Conclusion:** The adverse association of SSB is also seen for fruit juice consumption but does not  
54  
55  
56 58 extend to fruit intake. Further research is likely to improve our estimates.

1  
2 59 **Protocol registration:** ClinicalTrials.gov identifier: NCT02702375  
3  
4  
5 60

6  
7 61 **STRENGTHS AND LIMITATIONS OF THIS STUDY**  
8

- 9 62 - This systematic review and meta-analysis assessed the certainty of the evidence using the  
10  
11 Grading of Recommendations Assessment, Development and Evaluation (GRADE) system.  
12 63  
13  
14 64 - Large prospective cohort studies that were of high quality and had a long duration of follow-up  
15  
16 were included.  
17 65  
18  
19 66 - Most of the pooled results showed good consistency (low between study heterogeneity) and  
20  
21 sugar sweetened beverages showed evidence of a dose-response gradient.  
22 67  
23  
24 68 - Only three prospective cohort studies with low external generalizability were available for  
25  
26 inclusion.  
27 69  
28  
29 70 - The observational design of the prospective cohort studies did not allow for causal inferences  
30  
31 to be drawn.  
32 71  
33  
34 72  
35  
36 73  
37  
38 74  
39  
40  
41 75  
42  
43 76  
44  
45  
46 77  
47  
48 78  
49  
50  
51 79  
52  
53 80  
54  
55  
56 81  
57  
58  
59  
60

## 1 2 82 **INTRODUCTION**

3  
4 83 Gout and associated hyperuricemia were both associated with the development of hypertension,  
5  
6  
7 84 insulin resistance syndrome [1], and cardiovascular disease (CVD) [2]. Different diets have been  
8  
9 85 shown to be associated with the development and severity of gout [3]. Foods that increase net ATP  
10  
11  
12 86 degradation including alcohol and high purine meats are risk factors for gout [1]. Ingestion of large  
13  
14 87 amounts of the monosaccharide fructose can increase uric acid production during its metabolism in  
15  
16  
17 88 the liver through unregulated phosphorylation of ATP into AMP [1] as demonstrated in randomized  
18  
19 89 controlled trials [4, 5]. Similarly, in cohort studies, high intake of fructose-containing sugars in the  
20  
21  
22 90 form of sugar-sweetened beverages (SSBs) is associated with incident gout [6]. It is unclear whether  
23  
24 91 the association seen for SSBs holds for other important food-sources of fructose-containing sugars,  
25  
26  
27 92 such as fruit and fruit-based products, grains and grain-based products, dairy and dairy-based  
28  
29 93 products and sweets and desserts. As dietary guidelines and public health policy move from nutrient-  
30  
31 94 based recommendations toward food and dietary-based recommendations [3, 4, 7], it is important to  
32  
33  
34 95 understand the contribution of these different food sources of fructose-containing sugars to the  
35  
36 96 association of incident gout. To address this gap, we conducted a systematic review and meta-analysis  
37  
38  
39 97 of prospective cohort studies of the relation of important food sources of fructose-containing sugars  
40  
41 98 with incident gout and hyperuricemia.

## 43 99 44 45 46 100 **METHOD**

### 47 48 101 **Design**

49  
50  
51 102 We followed the Cochrane Handbook for Systematic Reviews of Interventions [8] for the conduct of  
52  
53 103 our systematic review and meta-analysis and reported our results according to the Meta-analysis of  
54  
55  
56 104 Observational Studies in Epidemiology (MOOSE) guidelines [9] and preferred Reporting Items for  
57  
58  
59  
60

1  
2 105 Systematic Reviews and Meta-Analysis (PRISMA) [10] guidelines. The study protocol was registered at  
3  
4 106 ClinicalTrials.gov (identifier, NCT02702375).  
5  
6

### 7 107 8 9 108 **Search strategy**

10  
11  
12 109 We conducted systematic searches in MEDLINE, EMBASE and Cochrane through September 13, 2017  
13  
14 110 with no language restriction (**supplementary table 1**). Targeted manual searches served to  
15  
16 111 supplement the database search; these included finding related papers from references of review  
17  
18 112 papers, included studies, perusing articles with data from major prospective cohorts that usually  
19  
20 113 report dietary data, and speaking to experts in the field.  
21  
22  
23

### 24 114 25 26 115 **Study selection**

27  
28  
29 116 We included prospective cohort studies of  $\geq 1$  year duration that assessed the association of important  
30  
31 117 food sources of fructose-containing sugars including non-alcoholic beverages (SSBs), cereal grain and  
32  
33 118 grain based products, fruit and fruit-based products, dairy and dairy-based products, and sweets,  
34  
35 119 chocolate and desserts with incident gout or hyperuricemia in participants free from gout or  
36  
37 120 hyperuricemia at the start of the study. One year duration was chosen as it allows for the  
38  
39  
40 121 development of diseases such as hyperuricemia and gout.  
42  
43  
44

### 45 46 122 47 48 123 **Data extraction**

49  
50 124 Two independent reviewers (SAC and QL) extracted relevant data from included studies onto  
51  
52 125 standardized pro forma. Extracted data included sample size, subject characteristics, sources of  
53  
54 126 fructose-containing sugars, exposure levels, duration of follow-up, number of gout or hyperuricemia  
55  
56 127 cases, model adjustments, and the risk ratio with 95% confidence intervals (95% CI) per quantile of  
57  
58  
59  
60



1  
2 128 intake. The main outcome was incident gout or hyperuricemia expressed as risk ratios (RR) with 95%  
3  
4 129 confidence intervals (95% CI). Discrepancies were resolved by consensus.

7 130

### 9 131 **Risk of bias**

11  
12 132 The same two independent reviewers (SAC and QL) assessed each study for risk of bias. Risk of bias  
13  
14 133 was assessed using the Newcastle-Ottawa Scale (NOS) for prospective cohort studies. Points were  
15  
16 134 awarded based on cohort selection, comparability of groups and assessment of outcomes, for a  
17  
18  
19 135 maximum total of 9 points [11]. Studies with  $\geq 6$  points were considered high quality [11]. Difference  
20  
21  
22 136 between reviewers was resolved by consensus.

24 137

### 26 138 **Statistical analyses**

28  
29 139 Primary pooled analyses were conducted using Review Manager (RevMan) 5.3 (The Nordic Cochrane  
30  
31 140 Centre, The Cochrane Collaboration, Copenhagen, Denmark). Sensitivity analysis and the assessments  
32  
33  
34 141 of dose response were performed using Stata 14 (StataCorp, College Station, TX, USA). Natural log-  
35  
36 142 transformed RR for incident gout or hyperuricemia, comparing extreme quantiles (the highest  
37  
38  
39 143 exposure versus the lowest exposure or reference group), were pooled separately for each food  
40  
41 144 source of fructose-containing sugars using the generic inverse variance method with DerSimonian and  
42  
43  
44 145 Laird random effects models and expressed as RRs with 95% CI. Inter-study heterogeneity was  
45  
46 146 assessed with the Cochran Q statistic with significance set at  $p < 0.10$  and quantified with the  $I^2$   
47  
48 147 statistic, where  $I^2 \geq 50\%$  represented evidence of substantial heterogeneity [8]. We explored sources  
49  
50  
51 148 of heterogeneity by sensitivity analyses. Sensitivity analyses, where each study was systematically  
52  
53 149 removed, and effect size was recalculated in the remaining studies, were carried out to explore the  
54  
55  
56 150 impact of individual studies on the pooled risk. As  $\geq 10$  cohort comparisons were not available, *a priori*

1  
2 151 subgroup analyses were not performed. Linear and non-linear dose-response analyses were assessed  
3  
4 152 by using generalized least squares trend estimation models (GLST) and spline curve modeling  
5  
6  
7 153 (MKSPLINE procedure), respectively [12]. Publication bias was not assessed as the number of cohort  
8  
9 154 comparisons was less than 10.  
10

## 14 156 **Grading of the evidence**

16  
17 157 The overall quality and the strength of the evidence was assessed using the Grading of  
18  
19 158 Recommendations Assessment, Development and Evaluation (GRADE) system [13-25]. The evidence  
20  
21 159 was graded as high, moderate, low, or very low quality, with observational studies starting with an  
22  
23  
24 160 initial grade of 'low'. This then can be downgraded based on 5 pre-specified criteria or upgraded  
25  
26 161 based on 3 pre-specified criteria. Criteria to downgrade included risk of bias (weight of studies  
27  
28  
29 162 showed risk of bias as assessed by low NOS <6), inconsistency (substantial unexplained inter-study  
30  
31 163 heterogeneity i.e.  $I^2 > 50\%$ ), indirectness (presence of factors that limit the generalizability of the  
32  
33  
34 164 results), imprecision in the pooled risk estimate (the 95% CI for risk estimates are wide or cross a  
35  
36 165 minimally important difference of 10% for benefit or harm (RR 0.9–1.1)), and publication bias  
37  
38  
39 166 (evidence of small-study effects). Conversely, criteria to upgrade included a large magnitude of effect  
40  
41 167 (RR > 2 or RR < 0.5 in the absence of plausible confounders), dose–response gradient or reasonable  
42  
43  
44 168 evidence of attenuation of the pooled effect estimate by confounders.  
45

## 48 170 **RESULTS**

### 51 171 **Search results**

53 172 **Figure 1** shows the flow of the systematic search and study selection. Of the 309 reports identified by  
54  
55  
56 173 the literature search, three reports with data from three prospective cohort studies met our inclusion  
57  
58  
59

1  
2 174 criteria [26-28]: Nurses' Health Study (NHS) [27], Health Professionals Follow-up Study (HPFS) [26] and  
3  
4 175 the National Runner's Health Study [28]. All three reports reported the association of food sources of  
5  
6  
7 176 fructose-containing sugars on incident gout, but none on incident hyperuricemia. These reports  
8  
9 177 involved a total of 154,289 participants with 1,761 incident cases of gout. Two reports each reported  
10  
11  
12 178 data on fruit intake [n= 75,383; 983 cases] [26, 28], fruit juice [n= 125,299; 1,533 cases] [26, 27] and  
13  
14 179 SSBs [n=125,299; 1,533 cases] [26, 27]. We did not identify prospective cohort studies reporting the  
15  
16  
17 180 association of other food sources of fructose-containing sugars (e.g. cereal grain and grain-based  
18  
19 181 products, sweets and desserts, dairy and dairy based products and chocolate) with incident gout.  
20  
21  
22 182

### 24 183 **Study characteristics**

26 184 **Table 1** lists the characteristics of the included prospective cohort studies. All studies were performed  
27  
28  
29 185 in the USA. The median age of the included participants ranged from 30 to 75. The median follow-up  
30  
31 186 periods was 17 years (range, 12 to 22 years) for SSB, 18.7 years (12 to 22 years) for fruit juice and 9.9  
32  
33  
34 187 years (7.74 to 12 years) for fruit. Dietary intake assessments were done with self-reported, validated  
35  
36 188 food frequency questionnaires (FFQs) in all studies. Quantiles of exposure depended on the food  
37  
38  
39 189 source. Lowest and highest median quantiles of exposure were <1 servings/month and ≥14  
40  
41 190 servings/week respectively for SSB; ≤1 servings/month and ≥14 servings/week respectively for fruit  
42  
43  
44 191 juice; and ≤0.4 servings/week (range, <0-0.5 servings/week) and ≥8 servings/day (range, ≥2-14  
45  
46 192 servings/day), respectively for fruit. The ascertainment of incident gout in both HPFS and NHS cohorts  
47  
48 193 [26, 27] was through self-report, followed by supplementary surveys of the subjects based on the  
49  
50  
51 194 American College of Rheumatology gout survey criteria [29] to confirm that the diagnosis. The authors  
52  
53 195 defined individuals with gout that met ≥6 of the 11 criteria for gout. In addition, in a sub-sample the  
54  
55  
56  
57  
58  
59  
60

1  
2 196 self-reported diagnoses were validated with medical records. As for the NRHS cohort [28], incident  
3  
4 197 gout was self-reported based upon physician diagnosis.  
5  
6

7 198  
8  
9 199 **Supplementary table 2** shows the complete list of adjusted confounding variables for the most  
10  
11 200 adjusted models for each of the included prospective cohorts. The median number of variables in the  
12  
13  
14 201 most adjusted models was 14 (range, 6 to 14). All studies adjusted for primary and secondary  
15  
16 202 confounders such as age, body mass index (BMI) and history of hypertension. Each of the three  
17  
18  
19 203 cohorts were single-sex studies, so adjustment for sex was not necessary. The NHS cohort study  
20  
21 204 authored by Choi *et al.* 2010 [27] and NRHS study by Williams *et al.* [28] were agency funded, while  
22  
23  
24 205 the HPFS paper authored by Choi *et al.* 2008 [26] was funded by both agency and industry.  
25

## 26 206 27 28 29 207 **Study Quality**

30  
31 208 **Supplementary table 3** shows the study quality assessments by the NOS scale. There was no evidence  
32  
33  
34 209 of serious risk of bias. Only NRHS cohort scored <6 on the NOS scale, which denotes lower quality  
35  
36 210 [28].  
37

## 38 211 39 40 41 212 **Fruit intake on incident gout**

42  
43 213 **Figure 2** shows the relationship between fruit intake and incident gout. When comparing the highest  
44  
45  
46 214 to the lowest intake, no association was shown for fruit intake on incident gout (RR = 0.82, 95% CI  
47  
48 215 0.61 to 1.11). There was evidence of significant interstudy heterogeneity ( $I^2 = 94%$ ,  $p < 0.001$ ).  
49

## 50 51 216 52 53 217 **Fruit juice intake on incident gout**

1  
2 218 **Figure 2** shows the relationship between fruit juice intake and incident gout. When comparing the  
3  
4 219 highest to lowest intake, a protective association was shown for fruit juice intake on incident gout (RR  
5  
6 220 1.76, 95% CI 1.19 to 2.60]). There was no evidence of significant interstudy heterogeneity ( $I^2 = 0\%$ ,  $p =$   
7  
8  
9 221 0.53).

10 222

11

12 223

13

14 223

15

16 224

17 224

18

19 225

20

21 226

22

23

24 227

25

26 228

27

28

29 229

30

31 230

32

33

34 231

35

36 232

37

38

39 233

40

41 234

42

43 235

44

45

46 236

47

48 237

49

50

51 238

52

53 239

54

55

56

57

58

59

60

### SSB intake on incident gout

**Figure 2** shows the relationship between SSB intake and incident gout. When comparing the highest with the lowest intake, an adverse association was shown for SSB intake on incident gout (RR=2.07 [95% CI 1.40 to 3.06]). There was no evidence of significant interstudy heterogeneity ( $I^2 = 0\%$ ,  $p = 0.52$ ).

### Additional analysis

Sensitivity analysis (the systematic removal of each study), publication bias and subgroup analyses could not be performed due to the small number of studies included in each analysis ( $n=2$ ).

### Dose-response analysis

A random-effect GLST model showed a significant dose-response relationship between SSB intake and incident gout per serving/week (RR = 1.05, 95% CI 1.03 to 1.07,  $p < 0.001$ ) (**supplementary figure 2**), but not for fruit juice intake (RR = 1.03, 95% CI 1.0 to 1.07,  $p = 0.06$ ) (**supplementary figure 1**). There was no evidence for departure from linear dose response gradient or dose thresholds for SSB intake while using the MKSPLINE procedure ( $p = 0.196$ ) (**supplementary figure 2**). In contrast, fruit juice intake showed a significant departure from linearity ( $p = 0.02$ ), and visual inspection of the graph

1  
2 240 (supplementary figure 1) indicated a plateau for risk increase after  $\geq 5$  servings per day. Dose-  
3  
4 241 response modeling was not possible for fruit intake due to lack of data.  
5  
6

## 7 242 8 9 243 **GRADE assessment**

10  
11  
12 244 **Table 2** shows the GRADE assessment of individual food sources of fructose-containing sugars. The  
13  
14 245 certainty of evidence of an adverse association from both fruit and fruit juice was rated as very low,  
15  
16 246 with downgrades to the lowest level for indirectness for fruit intake, and for inconsistency,  
17  
18  
19 247 indirectness and imprecision for fruit juice intake. The quality of evidence of an adverse association  
20  
21 248 of SSB intake with incident gout was rated as moderate, with a downgrade of one level for  
22  
23  
24 249 indirectness but upgrade of two levels for a large magnitude effect and significant dose-response.  
25

## 26 250 27 28 29 251 **DISCUSSION**

30  
31 252 We conducted a systematic review and meta-analysis of studies investigating the relation of  
32  
33  
34 253 important food sources of fructose-containing sugars with incident gout. We identified three  
35  
36 254 prospective cohort studies [26-28] comprising of 154,289 participants and 1,761 cases of incident  
37  
38  
39 255 gout. The pooled analyses revealed that there was moderate quality evidence that SSB intake was  
40  
41 256 associated with 207% increase in risk of incident gout when comparing the highest with the lowest  
42  
43  
44 257 intake. Similarly, there was low quality evidence that fruit juice intake was associated with a 14%  
45  
46 258 increase in risk of incident gout, but fruit intake did not show any significant association with incident  
47  
48 259 gout (low quality evidence). There was no data available of other important food sources of fructose-  
49  
50  
51 260 containing sugars.  
52

## 53 261 54 55 56 262 **Findings in the context of the literature**

1  
2 263 Our results are consistent with previous research that indicate that intake of certain food sources of  
3  
4 264 fructose-containing sugars are associated with the risk of gout. Our previous systematic review and  
5  
6  
7 265 meta-analysis of prospective cohort studies that assessed fructose intake, found a harmful  
8  
9 266 relationship between fructose consumption and gout [6]. While that study indicated that fructose  
10  
11  
12 267 moiety might possibly drive the association with gout, all the fructose data was derived from SSB  
13  
14 268 intake. Another systematic review of the literature identified numerous dietary factors associated  
15  
16  
17 269 with the risk of gout including meat, alcohol, seafood and SSBs, but also that lower risk was associated  
18  
19 270 with the intake of dairy, folate and coffee [3].  
20  
21  
22 271  
23  
24 272 SSBs are one of the main source of fructose-containing added sugars in the western diet comprising  
25  
26  
27 273 around 30% of intake of added sugars in the USA [30] and around 24% in Canada [31]. Excess intake of  
28  
29 274 fructose can increase uric acid through an unregulated phosphofructose kinase pathway that uses  
30  
31 275 substantial amounts of ATP [32] to convert fructose into fructose-1-phosphate in the liver [33].  
32  
33  
34 276 Mechanistically, net ATP degradation leads to accumulation of AMP, which is subsequently degraded  
35  
36 277 to uric acid. Additionally, fructose can increase de novo purine synthesis, which further produces uric  
37  
38  
39 278 acid [1]. This increase in uric acid can lead to gout. Since we were unable to investigate the  
40  
41 279 relationship between food sources of fructose-containing sugars and hyperuricemia, we cannot  
42  
43  
44 280 validate this mechanism. It is possible, that fructose increases the risk of gout independently of serum  
45  
46 281 uric acid levels. However, since the link between fructose and serum uric acid [34-37], and the link  
47  
48  
49 282 between serum uric acid and the development of gout have been independently established [1], it is  
50  
51 283 unlikely that fructose increases the risk of gout without using uric acid as an intermediate.  
52  
53 284

1  
2 285 We identified adverse association of fruit juices intake with incident gout. The two studies that  
3  
4 286 contributed to this result [26, 27] were both performed in the Harvard cohorts which do not  
5  
6  
7 287 differentiate between fruit drinks and pure fruit juice, the former being largely similar to SSBs i.e.  
8  
9 288 mainly sugar and water. This is supported by studies investigating pure fruit juice and fruit drinks  
10  
11  
12 289 which have shown divergent response for cardiometabolic disease [38, 39].  
13

14 290  
15  
16 291 We did not see any association between fruit intake and incident gout but the effect estimates in the  
17  
18  
19 292 two studies were in opposite direction. The NRHS [28] cohort showed a 51% reduction in risk of gout  
20  
21  
22 293 when with high intake of fruit whereas the HPFS [26] cohort showed a 63% increased risk — both  
23  
24 294 studies were performed in men. These discordant results highlight the differences in the studies.  
25  
26 295 NHPS cohort [26] only measured oranges and apples, fruit high in fructose, while NRHS [28] cohort  
27  
28  
29 296 assessed all fruit and its increasing intake, as the authors admit, might represent a healthier dietary  
30  
31 297 intake. It is possible that higher intake of fruits in NRHS might be associated with high intake of dairy  
32  
33  
34 298 or coffee, which have been associated with lowering the risk of gout [3] and not measured in NRHS.  
35  
36 299 Additionally, the highest fruit intake contained less fructose than the SSB and fruit juice food sources  
37  
38  
39 300 of fructose-containing sugars. Therefore, the exposure may not have been high enough to see  
40  
41 301 consistent affects. Furthermore, case-control and cross-sectional studies have shown a protective  
42  
43  
44 302 effect of fruit intake with gout [40, 41]. The harmful association for oranges, which are rich in vitamin  
45  
46 303 C, in HPFS [26] cohort is at odds with its own result in another paper, in which the author  
47  
48  
49 304 demonstrated a protective association of vitamin C intake with gout [42]. Fruits are rich in fructose;  
50  
51 305 however, fruit intake has consistently shown a benefit for cardiometabolic risk factors,  
52  
53 306 cardiometabolic diseases and all cause-mortality [43-49] even though the fructose in fruit can  
54  
55  
56 307 increase uric acid levels. More data might clarify this association.  
57  
58  
59  
60



1  
2 308  
3  
4 309 We could not find any prospective studies looking at the association of food sources of fructose-  
5  
6  
7 310 containing sugars and hyperuricemia even though hyperuricemia is the most important risk factor for  
8  
9 311 gout [3, 50]. Hyperuricemia is also a risk factor for hypertension [51], metabolic syndrome, diabetes  
10  
11  
12 312 [52], and CVD [53]. Several cross-sectional analyses have investigated the link between SSB  
13  
14 313 consumption and serum uric acid levels, showing a positive relationship [34-37]. In contrast, the  
15  
16  
17 314 analysis of the National Health and Nutrition Examination Survey (NHANES) showed no link between  
18  
19 315 dietary fructose and risk of hyperuricemia [54], indicating that perhaps different food sources of  
20  
21  
22 316 fructose-containing sugars may have different effects on serum uric acid. This point is reinforced by  
23  
24 317 another analysis of NHANES data that showed a relationship of SSB intake with higher serum uric acid  
25  
26  
27 318 concentration, but not with fruit juice [55]. Future studies investigating food sources of sugars and  
28  
29 319 risk of hyperuricemia may help to elucidate some of the above inconsistent findings.  
30

31 320

### 32 321 **Strengths and limitations**

33  
34  
35  
36 322 Our analysis has many strengths. First, we employed a comprehensive systematic search across major  
37  
38  
39 323 databases and the quantitative synthesis of results. Second, the studies we included had a substantial  
40  
41 324 number of participants and cases of gout (154,289 participants and 1,761 gout cases) leading to  
42  
43  
44 325 increased precision. Additionally, the median follow-up duration was greater than 10 years, which  
45  
46 326 allowed for enough time from exposure for the development of disease. Another strength is the use  
47  
48  
49 327 of validated measures of intake like food frequency questionnaires. The two Harvard cohorts [26, 27]  
50  
51 328 administered FFQ multiple times, and validated them on a subsample, allowing for more accurate and  
52  
53 329 robust long-term intakes compared to the NRHS [28] cohort, which only measured dietary intakes at  
54  
55  
56  
57  
58  
59  
60

1  
2 330 baseline. In our analysis, we made use of GRADE to evaluate the quality and strength of our analysis  
3  
4 331 and evaluate our confidence in the estimates.  
5  
6

7 332  
8  
9 333 There are some notable limitations to our systematic review and meta-analysis. First, while we  
10  
11 334 included the most adjusted multivariable models for this analysis, there is always potential for  
12  
13  
14 335 unmeasured and residual confounding, since the studies included were observational in nature. This  
15  
16 336 explains why GRADE starts at “low quality” for observational studies. Second, there was evidence of  
17  
18  
19 337 indirectness in some of the relationships. All studies were conducted in the USA, and two of the three  
20  
21 338 studies were in health professionals. The two Harvard [26, 27] cohorts included only middle aged or  
22  
23  
24 339 older people who worked in health care and who were predominately white and the NRHS [28]  
25  
26 340 cohort included only middle to old aged physically active men. Thus, the specific nature of the  
27  
28  
29 341 included studies’ population limits the generalizability of our results to other populations and  
30  
31 342 geographical locations; however, the biological process of diet and gout are still likely to be similar to  
32  
33  
34 343 other populations. While, genome wide association studies have found numerous genes that increase  
35  
36 344 one’s risk for gout [56] and some ethnic groups may be more susceptible than others [1] though it is  
37  
38  
39 345 not known if the association of fructose intake with gout is modified by genes. Third, sources of  
40  
41 346 heterogeneity remained unexplained; with only three studies, we were unable to assess publication  
42  
43  
44 347 bias or perform sensitivity or a priori subgroup analysis. Thus for these reasons, data pertaining to SSB  
45  
46 348 and fruit juice intake and incident gout received a GRADE of moderate and very low, respectively,  
47  
48  
49 349 indicating that further studies in this regard is likely to impact our certainty in the effect estimate and  
50  
51 350 may change the estimate for SSB and that our certainty in the estimate for fruit juice is very  
52  
53 351 uncertain; therefore, caution should be used when interpreting these results. Similarly, for fruit,  
54  
55  
56  
57  
58  
59  
60

1  
2 352 which received a GRADE of very low, so we are very uncertain in these results and caution should be  
3  
4 353 used in the interpretation of these results.  
5  
6

7 354

8

## 9 355 **Implications**

10

11 356 Dietary guidelines have shifted their focus from nutrients based recommendations to food and

12 13

14 357 dietary pattern-based recommendations [57], since it has been recognized that one does not eat

15

16 358 nutrients in isolation, but as a part of food. Interactions between nutrients in food are complex and

17 18

19 359 important components of disease risk [57]. Our findings support this view in relation to food sources

20

21 360 of fructose-containing sugars and their relationship with gout. Our findings also have implications for

22 23

24 361 recommendations for the prevention of gout. Conventional dietary recommendations for gout have

25

26 362 focused on restriction of purine intake; however, low-purine diets are often high in carbohydrates,

27 28

29 363 including fructose-rich foods [58]. We have shown an adverse association between fruit juice and

30

31 364 SSBs, supporting the recommendations to limit their intakes. Since we did not have data relating to

32 33

34 365 children, hyperuricemia or other food sources of fructose-containing sugars, we cannot extend our

35

36 366 conclusion to these groups of individuals or these foods.  
37

38

39 367

40

## 41 368 **Conclusion**

42

43 369 Our systematic review and meta-analysis of prospective cohort studies showed an adverse association

44 45

46 370 between SSBs and fruit juice with risk of gout, while there was no association with fruit intake. The

47

48 371 strength of the evidence was moderate for SSB intake and very low for fruit juice and fruit intake, as

49 50

51 372 assessed by GRADE. For SSBs, the true association is likely to be close to the estimate, but there is a

52

53 373 possibility that it is substantially different. For fruit juice and fruit intake, the true association are likely

54 55

56 374 to be substantially different from the estimate and future research will very likely impact our  
57

58

59

60

1  
2 375 confidence in the effect estimates and likely to change them [59]. Our results are consistent with the  
3  
4 376 literature that certain food sources of fructose-containing sugars especially SSBs are a risk factor for  
5  
6  
7 377 the development of gout. We were unable to identify studies assessing food sources of fructose-  
8  
9 378 containing sugars and hyperuricemia, indicating a gap in the literature. Given that incident gout is  
10  
11 379 rising [7, 60-65], and that gout and hyperuricemia are both associated with metabolic syndrome,  
12  
13  
14 380 myocardial infarction, diabetes and premature death [1, 2, 66], it is becoming increasingly important  
15  
16 381 to identify and understand risk factors for developing gout. It is imperative for additional prospective  
17  
18  
19 382 studies to assess the intake of various food sources of fructose-containing sugars and their  
20  
21 383 relationship with gout and hyperuricemia in diverse populations. This will help identify to what extent  
22  
23  
24 384 does our foods mediate the risk for hyperuricemia and gout and will further inform health care  
25  
26 385 professionals, policymakers, and aid in the development of improved dietary guidelines for the  
27  
28  
29 386 prevention and management of gout and hyperuricemia.  
30

### 31 387 32 33 34 388 **Funding Statement**

35  
36 389 This work was funded by the Canadian Institutes of Health Research (funding reference number,  
37  
38  
39 390 129920). The Diet, Digestive tract, and Disease (3-D) Centre, funded through the Canada Foundation  
40  
41 391 for Innovation (CFI) and the Ministry of Research and Innovation's Ontario Research Fund (ORF),  
42  
43  
44 392 provided the infrastructure for the conduct of this project. **JL Sievenpiper** was funded by a PSI  
45  
46 393 Graham Farquharson Knowledge Translation Fellowship, Canadian Diabetes Association (CDA)  
47  
48 394 Clinician Scientist award, CIHR INMD/CNS New Investigator Partnership Prize, and Banting & Best  
49  
50  
51 395 Diabetes Centre Sun Life Financial New Investigator Award. None of the sponsors had a role in any  
52  
53 396 aspect of the present study, including design and conduct of the study; collection, management,  
54  
55  
56  
57  
58  
59  
60

1  
2 397 analysis, and interpretation of the data; and preparation, review, approval of the manuscript or  
3  
4 398 decision to publish.

7 399

9 400 **Data Sharing**

12 401 There is no additional unpublished data available from the study.

14 402

17 403 **Competing Interests**

19 404 **TA Khan** has received research support from the Canadian Institutes of health Research (CIHR) and an

22 405 unrestricted travel donation from Bee Maid Honey Ltd. **RJ de Souza** has served as an external

24 406 resource person to the World Health Organization (WHO) Nutrition Guidance Expert Advisory Group

27 407 (NUGAG) Subgroup on Diet and Health (guidelines for trans fats and saturated fats), and received

29 408 remuneration from WHO for travel and accommodation. He also received compensation for contract

31 409 research conducted for the Institute of Nutrition, Metabolism, and Diabetes at the Canadian Institutes

34 410 of Health Research (CIHR), Health Canada and WHO. He has received research grants from the

36 411 Canadian Foundation for Dietetic Research and CIHR, and lecture fees from McMaster Children's

39 412 Hospital. **TMS Wolever** and his wife are part owners and employees of Glycemic Index Laboratories.

41 413 **CWC Kendall** has received research support from the Advanced Foods and Materials Network,

44 414 Agricultural Bioproducts Innovation Program through the Pulse Research Network, Agriculture and

46 415 Agri-Food Canada, Almond Board of California, Barilla, Calorie Control Council, CIHR, Canola Council of

48 416 Canada, The International Tree Nut Council Nutrition Research & Education Foundation, Kellogg,

51 417 Loblaw Companies Ltd., Pulse Canada, Saskatchewan Pulse Growers and Unilever. He has received

53 418 consultant fees from American Pistachio Growers; speaker fees from American Peanut Council, Tate &

56 419 Lyle and The WhiteWave Foods Company; and travel funding from Sabra Dipping Company, Tate &

1  
2 420 Lyle, International Tree Nut Council Research & Education Foundation, California Walnut Commission,  
3  
4 421 Sun-Maid, The Peanut Institute, General Mills, Oldways Foundation and International Nut and Dried  
5  
6  
7 422 Fruit Council Foundation. He is on the Clinical Practice Guidelines Expert Committee for Nutrition  
8  
9 423 Therapy of the European Association for the Study of Diabetes (EASD). He is a member of the  
10  
11  
12 424 International Carbohydrate Quality Consortium (ICQC), Secretary of the Diabetes and Nutrition Study  
13  
14 425 Group (DNSG) of the EASD, and a Director of the Toronto 3D Knowledge Synthesis and Clinical Trials  
15  
16  
17 426 foundation. **JL Sievenpiper** has received research support from the CIHR, Canadian Diabetes  
18  
19 427 Association (CDA), PSI Foundation, Banting and Best Diabetes Centre (BBDC), Canadian Nutrition  
20  
21  
22 428 Society (CNS), American Society for Nutrition (ASN), Calorie Control Council, INC International Nut and  
23  
24 429 Dried Fruit Council Foundation, National Dried Fruit Trade Association, The Tate and Lyle Nutritional  
25  
26  
27 430 Research Fund at the University of Toronto, and The Glycemic Control and Cardiovascular Disease in  
28  
29 431 Type 2 Diabetes Fund at the University of Toronto (a fund established by the Alberta Pulse Growers).  
30  
31 432 He has received speaker fees and/or honoraria from the CDA, CNS, Dr. Pepper Snapple Group, Dairy  
32  
33  
34 433 Farmers of Canada, Nutrition Foundation of Italy (NFI), C3 Collaborating for Health, Sprim Brasil,  
35  
36 434 WhiteWave Foods, Rippe Lifestyle, mdBriefcase, Alberta Milk, FoodMinds LLC, Memac Ogilvy &  
37  
38  
39 435 Mather LLC, PepsiCo, The Ginger Network LLC, International Sweeteners Association, and Pulse  
40  
41 436 Canada. He has ad hoc consulting arrangements with Winston & Strawn LLP, Perkins Coie LLP, and  
42  
43  
44 437 Tate & Lyle. He is a member of the European Fruit Juice Association Scientific Expert Panel. He is on  
45  
46 438 the Clinical Practice Guidelines Expert Committees of the CDA, European Association for the study of  
47  
48  
49 439 Diabetes (EASD), and Canadian Cardiovascular Society (CCS), as well as an expert writing panel of the  
50  
51 440 ASN. He serves as an unpaid scientific advisor for the Food, Nutrition, and Safety Program (FNSP) and  
52  
53 441 the Technical Committee on Carbohydrates of the International Life Science Institute (ILSI) North  
54  
55  
56 442 America. He is a member of the International Carbohydrate Quality Consortium (ICQC), Executive  
57  
58  
59  
60

1  
2 443 Board Member of the Diabetes and Nutrition Study Group (DNSG) of the EASD, a Director of the  
3  
4 444 Toronto 3D Knowledge Synthesis and Clinical Trials foundation. His wife is an employee of Unilever  
5  
6  
7 445 Canada. No competing interests were declared by **Q Liu, S Ayoub-Charette, F Au-Yeung, S Blanco**  
8  
9 446 **Mejia, LA Leiter**. There are no patents, products in development or marketed products to declare.  
10

11  
12 447

#### 14 448 **Authors' contributions**

15  
16 449 All authors had full access to all of the data (including statistical reports and tables) in this study and  
17  
18 450 take full responsibility for the integrity of the data and the accuracy of the data analysis.

19  
20 451 **Conception and design:** J.L. Sievenpiper.

21  
22 452 **Analysis and interpretation of the data:** Q. Liu, S. Ayoub-Charette, T.A.Khan, F. Au-Yeung, S. Blanco  
23 453 Mejia, R.J. de Souza, L.A. Leiter, C.W.C. Kendall, J.L. Sievenpiper.

24  
25 454 **Drafting of the article:** Q. Liu, T.A. Khan, J.L. Sievenpiper.

26  
27 455 **Critical revision of the article for important intellectual content:** Q. Liu, S. Ayoub-Charette, T.A. Khan,  
28  
29 456 F. Au-Yeung, S. Blanco Mejia, R.J. de Souza, L.A. Leiter, C.W.C. Kendall, J.L. Sievenpiper.

30  
31 457 **Final approval of the article:** Q. Liu, S. Ayoub-Charette, T.A. Khan, F. Au-Yeung, S. Blanco Mejia, R.J. de  
32 458 Souza, L.A. Leiter, C.W.C. Kendall, J.L. Sievenpiper.

33  
34 459 **Statistical expertise:** T.A. Khan, R.J. de Souza

35  
36 460 **Obtaining of funding:** J.L. Sievenpiper.

37  
38 461 **Administrative, technical, or logistic support:** S. Blanco Mejia

39  
40 462 **Collection and assembly of data:** Q. Liu, S. Ayoub-Charette, F. Au-Yeung

41  
42 463 **Guarantor:** J.L. Sievenpiper  
43 464  
44  
45 465  
46  
47 466  
48 467  
49  
50 468  
51  
52 469  
53  
54 470  
55  
56 471  
57  
58  
59  
60

1  
2 472 **REFERENCES**

- 3  
4 473 1. Choi, H.K.M., D. B. Reginato, A. M. American College of, Physicians American Physiological,  
5 474 Society, *Pathogenesis of gout*. Ann Intern Med, 2005. **143**(7): p. 499-516.
- 6 475 2. Oparil, S.Z., M. A. Calhoun, D. A., *Pathogenesis of hypertension*. Ann Intern Med, 2003. **139**(9):  
7 476 p. 761-76.
- 8 477 3. Singh, J.A., S.G. Reddy, and J. Kundukulam, *Risk factors for gout and prevention: a systematic*  
9 478 *review of the literature*. Curr Opin Rheumatol, 2011. **23**(2): p. 192-202.
- 10 479 4. Emmerson, B.T., *Effect of oral fructose on urate production*. Ann Rheum Dis, 1974. **33**(3): p.  
11 480 276-80.
- 12 481 5. Fox, I.H. and W.N. Kelley, *Studies on the mechanism of fructose-induced hyperuricemia in man*.  
13 482 *Metabolism*, 1972. **21**(8): p. 713-21.
- 14 483 6. Jamnik, J., et al., *Fructose intake and risk of gout and hyperuricemia: a systematic review and*  
15 484 *meta-analysis of prospective cohort studies*. BMJ Open, 2016. **6**(10): p. e013191.
- 16 485 7. Trifiro, G., et al., *Epidemiology of gout and hyperuricaemia in Italy during the years 2005-2009:*  
17 486 *a nationwide population-based study*. Ann Rheum Dis, 2013. **72**(5): p. 694-700.
- 18 487 8. *Cochrane Handbook for Systematic Reviews of Interventions*. The Cochrane Collaboration 2011  
19 488 March 2011 [cited 2016 November 4th]; Available from: [www.handbook.cochrane.org](http://www.handbook.cochrane.org).
- 20 489 9. Stroup, D.F., et al., *Meta-analysis of observational studies in epidemiology: a proposal for*  
21 490 *reporting*. *Meta-analysis Of Observational Studies in Epidemiology (MOOSE) group*. JAMA,  
22 491 2000. **283**(15): p. 2008-12.
- 23 492 10. Moher, D., et al., *Reprint--preferred reporting items for systematic reviews and meta-analyses:*  
24 493 *the PRISMA statement*. Phys Ther, 2009. **89**(9): p. 873-80.
- 25 494 11. Wells, G.A., et al. *The Newcastle-Ottawa Scale (NOS) for assessing the quality of*  
26 495 *nonrandomised studies in meta-analyses*. 2000 [cited 2016 November 4]; Available from:  
27 496 [http://www.ohri.ca/programs/clinical\\_epidemiology/oxford.asp](http://www.ohri.ca/programs/clinical_epidemiology/oxford.asp).
- 28 497 12. Orsini, N., R. Bellocco, and S. Greenland, *Generalized least squares for trend estimation of*  
29 498 *summarized dose-response data*. Stata Journal, 2006. **6**(1): p. 40.
- 30 499 13. Guyatt, G., et al., *GRADE guidelines: 1. Introduction-GRADE evidence profiles and summary of*  
31 500 *findings tables*. J Clin Epidemiol, 2011. **64**(4): p. 383-94.
- 32 501 14. Guyatt, G.H., et al., *GRADE guidelines: 2. Framing the question and deciding on important*  
33 502 *outcomes*. J Clin Epidemiol, 2011. **64**(4): p. 395-400.
- 34 503 15. Balshem, H., et al., *GRADE guidelines: 3. Rating the quality of evidence*. J Clin Epidemiol, 2011.  
35 504 **64**(4): p. 401-6.
- 36 505 16. Guyatt, G.H., et al., *GRADE guidelines: 4. Rating the quality of evidence--study limitations (risk*  
37 506 *of bias)*. J Clin Epidemiol, 2011. **64**(4): p. 407-15.
- 38 507 17. Guyatt, G.H., et al., *GRADE guidelines: 5. Rating the quality of evidence--publication bias*. J Clin  
39 508 Epidemiol, 2011. **64**(12): p. 1277-82.
- 40 509 18. Guyatt, G.H., et al., *GRADE guidelines 6. Rating the quality of evidence--imprecision*. J Clin  
41 510 Epidemiol, 2011. **64**(12): p. 1283-93.
- 42 511 19. Guyatt, G.H., et al., *GRADE guidelines: 7. Rating the quality of evidence--inconsistency*. J Clin  
43 512 Epidemiol, 2011. **64**(12): p. 1294-302.
- 44 513 20. Guyatt, G.H., et al., *GRADE guidelines: 8. Rating the quality of evidence--indirectness*. J Clin  
45 514 Epidemiol, 2011. **64**(12): p. 1303-10.
- 46 515 21. Guyatt, G.H., et al., *GRADE guidelines: 9. Rating up the quality of evidence*. J Clin Epidemiol,  
47 516 2011. **64**(12): p. 1311-6.
- 48  
49  
50  
51  
52  
53  
54  
55  
56  
57  
58  
59  
60



- 1  
2 517 22. Brunetti, M., et al., *GRADE guidelines: 10. Considering resource use and rating the quality of*  
3 518 *economic evidence*. J Clin Epidemiol, 2013. **66**(2): p. 140-50.
- 4 519 23. Guyatt, G., et al., *GRADE guidelines: 11. Making an overall rating of confidence in effect*  
5 520 *estimates for a single outcome and for all outcomes*. J Clin Epidemiol, 2013. **66**(2): p. 151-7.
- 7 521 24. Guyatt, G.H., et al., *GRADE guidelines: 12. Preparing summary of findings tables-binary*  
8 522 *outcomes*. J Clin Epidemiol, 2013. **66**(2): p. 158-72.
- 9 523 25. Guyatt, G.H., et al., *GRADE guidelines: 13. Preparing summary of findings tables and evidence*  
10 524 *profiles-continuous outcomes*. J Clin Epidemiol, 2013. **66**(2): p. 173-83.
- 12 525 26. Choi, H.K. and G. Curhan, *Soft drinks, fructose consumption, and the risk of gout in men:*  
13 526 *prospective cohort study*. BMJ, 2008. **336**(7639): p. 309-12.
- 14 527 27. Choi, H.K., W. Willett, and G. Curhan, *Fructose-rich beverages and risk of gout in women*.  
15 528 JAMA, 2010. **304**(20): p. 2270-8.
- 17 529 28. Williams, P.T., *Effects of diet, physical activity and performance, and body weight on incident*  
18 530 *gout in ostensibly healthy, vigorously active men*. American Journal of Clinical Nutrition, 2008.  
19 531 **87**(5): p. 1480-7.
- 20 532 29. Wallace, S.L., et al., *Preliminary criteria for the classification of the acute arthritis of primary*  
21 533 *gout*. Arthritis Rheum, 1977. **20**(3): p. 895-900.
- 23 534 30. Vos, M.B., et al., *Dietary fructose consumption among US children and adults: the Third*  
24 535 *National Health and Nutrition Examination Survey*. Medscape J Med, 2008. **10**(7): p. 160.
- 25 536 31. Brisbois, T.D., et al., *Estimated intakes and sources of total and added sugars in the Canadian*  
26 537 *diet*. Nutrients, 2014. **6**(5): p. 1899-912.
- 28 538 32. Kanbay, M., et al., *Uric acid in metabolic syndrome: from an innocent bystander to a central*  
29 539 *player*. European journal of internal medicine, 2016. **29**: p. 3-8.
- 30 540 33. Garrett, R., et al., *Biochemistry, First Canadian Edition*. 2013, Toronto ON: Nelsoneducation.
- 31 541 34. Choi, J.W., et al., *Sugar-sweetened soft drinks, diet soft drinks, and serum uric acid level: the*  
32 542 *Third National Health and Nutrition Examination Survey*. Arthritis Rheum, 2008. **59**(1): p. 109-  
34 543 16.
- 35 544 35. Zgaga, L., et al., *The association of dietary intake of purine-rich vegetables, sugar-sweetened*  
36 545 *beverages and dairy with plasma urate, in a cross-sectional study*. PLoS One, 2012. **7**(6): p.  
37 546 e38123.
- 39 547 36. Bomback, A.S., et al., *Sugar-sweetened soda consumption, hyperuricemia, and kidney disease*.  
40 548 *Kidney Int*, 2010. **77**(7): p. 609-16.
- 41 549 37. Meneses-Leon, J., et al., *Sweetened beverage consumption and the risk of hyperuricemia in*  
42 550 *Mexican adults: a cross-sectional study*. BMC Public Health, 2014. **14**: p. 445.
- 43 551 38. Griep, L.M.O., et al., *Raw and processed fruit and vegetable consumption and 10-year coronary*  
44 552 *heart disease incidence in a population-based cohort study in the Netherlands*. PLoS One, 2010.  
46 553 **5**(10): p. e13609.
- 47 554 39. Imamura, F., et al., *Consumption of sugar sweetened beverages, artificially sweetened*  
48 555 *beverages, and fruit juice and incidence of type 2 diabetes: systematic review, meta-analysis,*  
49 556 *and estimation of population attributable fraction*. BMJ, 2015. **351**: p. h3576.
- 51 557 40. Lyu, L.-C., et al., *A case-control study of the association of diet and obesity with gout in Taiwan*.  
52 558 *The American journal of clinical nutrition*, 2003. **78**(4): p. 690-701.
- 53 559 41. Liu, L., et al., *Relationship between lifestyle choices and hyperuricemia in Chinese men and*  
54 560 *women*. Clinical rheumatology, 2013. **32**(2): p. 233-239.
- 56 561 42. Gao, X.C., G. Forman, J. P. Ascherio, A. Choi, H. K., *Vitamin C intake and serum uric acid*  
57 562 *concentration in men*. Journal of Rheumatology, 2008. **35**(9): p. 1853-8.

- 1  
2 563 43. Jia, X., et al., *Consumption of citrus and cruciferous vegetables with incident type 2 diabetes mellitus based on a meta-analysis of prospective study*. Prim. Care Diabetes, 2016.  
3 564  
4 565 44. Du, H., et al., *Fresh Fruit Consumption and Major Cardiovascular Disease in China*. N. Engl. J.  
5 566 Med., 2016. **374**(14): p. 1332-1343.  
6 567 45. Li, B., et al., *Fruit and Vegetables Consumption and Risk of Hypertension: A Meta-Analysis*.  
7 568 Journal of Clinical Hypertension, 2016. **18**(5): p. 468-476.  
8 569 46. Aune, D., et al., *Fruit and vegetable intake and the risk of cardiovascular disease, total cancer*  
9 570 *and all-cause mortality—a systematic review and dose-response meta-analysis of prospective*  
10 571 *studies*. International Journal of Epidemiology, 2016.  
11 572 47. Li, M., et al., *Fruit and vegetable intake and risk of type 2 diabetes mellitus: meta-analysis of*  
12 573 *prospective cohort studies*. BMJ open, 2014. **4**(11): p. e005497.  
13 574 48. Wang, X., et al., *Fruit and vegetable consumption and mortality from all causes, cardiovascular*  
14 575 *disease, and cancer: systematic review and dose-response meta-analysis of prospective cohort*  
15 576 *studies*. BMJ, 2014. **349**: p. g4490.  
16 577 49. Wu, L., D. Sun, and Y. He, *Fruit and vegetables consumption and incident hypertension: dose-*  
17 578 *response meta-analysis of prospective cohort studies*. Journal of human hypertension, 2016.  
18 579 **30**(10): p. 573.  
19 580 50. Saag, K.G. and H. Choi, *Epidemiology, risk factors, and lifestyle modifications for gout*. Arthritis  
20 581 Res Ther, 2006. **8 Suppl 1**: p. S2.  
21 582 51. Grayson, P.C., et al., *Hyperuricemia and incident hypertension: a systematic review and meta-*  
22 583 *analysis*. Arthritis Care Res (Hoboken), 2011. **63**(1): p. 102-10.  
23 584 52. Li, C., M.C. Hsieh, and S.J. Chang, *Metabolic syndrome, diabetes, and hyperuricemia*. Curr Opin  
24 585 Rheumatol, 2013. **25**(2): p. 210-6.  
25 586 53. Choi, H.K., *A prescription for lifestyle change in patients with hyperuricemia and gout*. Curr  
26 587 Opin Rheumatol, 2010. **22**(2): p. 165-72.  
27 588 54. Sun, S.Z., et al., *Lack of association between dietary fructose and hyperuricemia risk in adults*.  
28 589 Nutr Metab (Lond), 2010. **7**: p. 16.  
29 590 55. Gao, X.Q., L. Qiao, N. Choi, H. K. Curhan, G. Tucker, K. L. Ascherio, A., *Intake of added sugar*  
30 591 *and sugar-sweetened drink and serum uric acid concentration in US men and women*.  
31 592 Hypertension, 2007. **50**(2): p. 306-312.  
32 593 56. Reginato, A.M., et al., *The genetics of hyperuricaemia and gout*. Nat Rev Rheumatol, 2012.  
33 594 **8**(10): p. 610-21.  
34 595 57. Sievenpiper, J.L. and P.D. Dworatzek, *Food and dietary pattern-based recommendations: an*  
35 596 *emerging approach to clinical practice guidelines for nutrition therapy in diabetes*. Can J  
36 597 Diabetes, 2013. **37**(1): p. 51-7.  
37 598 58. Peixoto, M.R., et al., *Diet and medication in the treatment of hyperuricemia in hypertensive*  
38 599 *patients*. Arq Bras Cardiol, 2001. **76**(6): p. 463-72.  
39 600 59. Andrews, J., et al., *GRADE guidelines: 14. Going from evidence to recommendations: the*  
40 601 *significance and presentation of recommendations*. J Clin Epidemiol, 2013. **66**(7): p. 719-25.  
41 602 60. Rai, S.K., et al., *Trends in Gout and Rheumatoid Arthritis Hospitalizations in Canada from 2000-*  
42 603 *2011*. . Arthritis Care and Research, 2016.  
43 604 61. Arromdee, E., et al., *Epidemiology of gout: is incidence rising?* Journal of Rheumatology, 2002.  
44 605 **29**: p. 2403-2306.  
45 606 62. Zhu, Y., B.J. Pandya, and H.K. Choi, *Prevalence of gout and hyperuricemia in the US general*  
46 607 *population: the National Health and Nutrition Examination Survey 2007-2008*. Arthritis Rheum,  
47 608 2011. **63**(10): p. 3136-41.  
48  
49  
50  
51  
52  
53  
54  
55  
56  
57  
58  
59  
60

- 1  
2 609 63. Wallace, K.L., et al., *Increasing prevalence of gout and hyperuricemia over 10 years among*  
3 610 *older adults in a managed care population.* J Rheumatol, 2004. **31**(8): p. 1582-7.  
4 611 64. Harris, C.M., D.C. Lloyd, and J. Lewis, *The prevalence and prophylaxis of gout in England.* J Clin  
5 612 Epidemiol, 1995. **48**(9): p. 1153-8.  
6 613 65. Klemp, P., et al., *Gout is on the increase in New Zealand.* Ann Rheum Dis, 1997. **56**(1): p. 22-6.  
7 614 66. Canada, S. *The 10 leading causes of death, 2011.* 2015 2015-11-27 [cited 2016 4th of  
8 615 November]; Available from: [http://www.statcan.gc.ca/pub/82-625-x/2014001/article/11896-](http://www.statcan.gc.ca/pub/82-625-x/2014001/article/11896-eng.htm)  
9 616 [eng.htm](http://www.statcan.gc.ca/pub/82-625-x/2014001/article/11896-eng.htm).  
10 617  
11  
12  
13 618  
14  
15 619  
16  
17 620  
18  
19 621  
20  
21 622  
22  
23 623  
24  
25 624  
26  
27 625  
28  
29 626  
30  
31 627  
32  
33 628  
34  
35 629  
36  
37 630  
38  
39 631  
40  
41 632  
42  
43 633  
44  
45 634  
46  
47 635  
48  
49 636  
50  
51 637  
52  
53 638  
54  
55 639  
56  
57 640  
58  
59 641  
60

1  
2 642 **TABLES AND FIGURES**  
3

4 643  
5  
6 644 **Figure 1** Summary of evidence search and selection. Flow of the literature search for the effect of  
7 645 food sources of sugar intake on incident gout and hyperuricemia. Of the 280 studies initially  
8 646 identified, 265 were excluded based on title and/or abstract. The remainder were read in full by two  
9 647 independent reviewers; after, 12 were further excluded. Included in this analysis were three  
10 648 prospective cohort studies.  
11  
12

13 649  
14  
15 650 **Figure 2** Relation between intake of fruit, fruit juice and SSB incident gout. Estimates from most-  
16 651 adjusted multivariate models accounting for food sources of fructose-containing sugars intake were  
17 652 used. The diamond represents the pooled effect estimate. Interstudy heterogeneity was tested using  
18 653 the Cochran Q statistic and quantified using the  $I^2$  statistic ( $I^2 \geq 50\%$  indicative of significant  
19 654 heterogeneity). All results are presented as RR with 95% CI. OJ = orange juice. Other = other fruit  
20 655 juices.  
21  
22  
23  
24  
25  
26  
27  
28  
29  
30  
31  
32  
33  
34  
35  
36  
37  
38  
39  
40  
41  
42  
43  
44  
45  
46  
47  
48  
49  
50  
51  
52  
53  
54  
55  
56  
57  
58  
59  
60

1

2 674 **Table 1** Characteristics of prospective cohort studies investigating food sources of fructose-containing sugar intake and incident

3

4 675 gout.

5

| Study, year (Reference)                  | Cohort                               | Country | Participants | Incident Cases | Age (years, range) | Follow-up (mean, range) | Dietary Assessment | Frequency of Administration | Quantiles | Exposure (servings/week, median, range) | Serving size | Outcome assessment | Funding Source*     |
|------------------------------------------|--------------------------------------|---------|--------------|----------------|--------------------|-------------------------|--------------------|-----------------------------|-----------|-----------------------------------------|--------------|--------------------|---------------------|
| 6 Sugar sweetened beverage (SSB)         |                                      |         |              |                |                    |                         |                    |                             |           |                                         |              |                    |                     |
| 7 HPFS (Choi <i>et al.</i> , 2008) (26)  | Health Professionals Follow-Up Study | USA     | 46,393 (M)   | 755            | 52.5 (40-75)       | 12 years                | Validated SFFQ     | 4 times                     | Quintiles | ¼ - ≥14                                 | Not reported | Record linkage     | Agency and Industry |
| 8 NHS (Choi <i>et al.</i> , 2010) (27)   | Nurses Health Study                  | USA     | 78,906 (F)   | 778            | 49 (30-55)         | 22 years                | Validated SFFQ     | 4 times                     | Sextiles  | ¼ - ≥14                                 | Not reported | Self-reported      | Agency              |
| 9 Fruit juice                            |                                      |         |              |                |                    |                         |                    |                             |           |                                         |              |                    |                     |
| 10 NHS (Choi <i>et al.</i> , 2008) (26)  | Health Professionals Follow-Up Study | USA     | 46,393 (M)   | 755            | 52.5 (40-75)       | 12 years                | Validated SFFQ     | 4 times                     | Quintiles | ¼ - ≥14                                 | Not reported | Record linkage     | Agency              |
| 11 HPFS (Choi <i>et al.</i> , 2010) (27) | Nurses Health Study                  | USA     | 78,906 (F)   | 778            | 49 (30-55)         | 22 years                | Validated SFFQ     | 4 times                     | Sextiles  | ¼ - ≥14                                 | Not reported | Self-reported      | Agency and industry |
| 12 Fruit                                 |                                      |         |              |                |                    |                         |                    |                             |           |                                         |              |                    |                     |
| 13 NHHS (Williams, 2008) (28)            | National Runner's Health Study       | USA     | 28,990 (M)   | 228            | 44.9               | 7.7 years (5.9-9.6)     | Validated SFFQ     | 1 (baseline)                | Quartiles | ¼ - 2 (0 - ≥2)                          | Not reported | Self-reported      | Agency              |
| 14 NHS (Choi <i>et al.</i> , 2008) (26)  | Health Professionals Follow-Up Study | USA     | 46,393 (M)   | 755            | 52.5 (40-75)       | 12 years                | Validated SFFQ     | 4 times                     | Quintiles | <¼ - ≥14                                | Not reported | Record linkage     | Agency              |

32 676

33 677 Abbreviations: SFFQ = Semi quantitative Food-Frequency Questionnaire; M=males; F=females.

34

35 678 \*Agency funding is that from government, university or not-for-profit health agency sources.

36

37 679

38

39 680

40

41 681

42

43

44

45

46

47

**Table 2** GRADE assessment of individual food source of fructose-containing sugars.

| Quality assessment                                                            |                       |                         |                                         |                                   |                        |                         |                                                                      | Study event rates (%) | Effect Relative Risk (95% CI) | Quality Importance                                                                                                                       |
|-------------------------------------------------------------------------------|-----------------------|-------------------------|-----------------------------------------|-----------------------------------|------------------------|-------------------------|----------------------------------------------------------------------|-----------------------|-------------------------------|------------------------------------------------------------------------------------------------------------------------------------------|
| No. of studies                                                                | Design                | Risk of bias            | Inconsistency                           | Indirectness                      | Imprecision            | Publication bias        | Other considerations                                                 |                       |                               |                                                                                                                                          |
| Sugar sweetened beverages intake on incident gout (follow-up median 17 years) |                       |                         |                                         |                                   |                        |                         |                                                                      |                       |                               |                                                                                                                                          |
| 2                                                                             | Observational studies | No serious risk of bias | No serious inconsistency                | Serious indirectness <sup>1</sup> | No serious imprecision | Undetected <sup>2</sup> | Large magnitude of effect <sup>3</sup><br>Dose-response <sup>4</sup> | 1533/125299 (1.22%)   | 2.08 [1.40, 3.07]             | ⊕⊕⊕○<br><b>Moderate</b> <sup>1,2,3,4</sup><br>Due to downgrade for indirectness and upgrade for large magnitude effect and dose-response |
| Fruit juice intake on incident gout (follow-up median 17 years)               |                       |                         |                                         |                                   |                        |                         |                                                                      |                       |                               |                                                                                                                                          |
| 2                                                                             | Observational studies | No serious risk of bias | No serious inconsistency                | Serious indirectness <sub>1</sub> | No serious imprecision | Undetected <sup>2</sup> | None                                                                 | 1532/125299 (1.22%)   | 1.73 [1.17, 2.57]             | ⊕○○○<br><b>Very low</b> <sup>1,2</sup><br>Due to downgrade for indirectness                                                              |
| Fruit intake on incident gout (follow-up median 9.87 years)                   |                       |                         |                                         |                                   |                        |                         |                                                                      |                       |                               |                                                                                                                                          |
| 2                                                                             | Observational studies | No serious risk of bias | Very serious inconsistency <sup>5</sup> | Serious indirectness <sub>1</sub> | Serious <sup>6</sup>   | Undetected <sup>2</sup> | None                                                                 | 982/75383 (1.3%)      | 0.89 [0.27, 2.87]             | ⊕○○○<br><b>Very low</b> <sup>1,2,5,6</sup><br>Due to downgrade for inconsistency, indirectness and imprecision                           |

<sup>1</sup>Downgrade for indirectness, as the study population is specific to a group of the population like professionals, nurses or runners.

1  
2 686 <sup>2</sup>No downgrade for publication bias, as publication bias could not be assessed due to lack of power for assessing funnel plot asymmetry  
3  
4 687 and small study effect (<10 cohort included in our meta-analysis).

5  
6 688 <sup>3</sup>Upgrade for a large magnitude of effect (RR>2.0).

7  
8 689 <sup>4</sup>Upgrade for a dose response gradient, as the GLST dose-response analysis revealed a significant linear relationship between sugar  
9 690 sweetened beverage intake and incident gout (P=0.0001).  
10

11 691 <sup>5</sup>Downgrade for very serious inconsistency, as the two studies included had opposite associations and there was evidence of substantial  
12 inter-study heterogeneity ( $I^2=94%$ ,  $p<0.0001$ ). Due to the small number of studies included in the analysis, subgroup analysis was not  
13 692 performed.  
14  
15 693

16  
17 694 <sup>6</sup>Downgrade for serious imprecision, as the lower bound of the 95% CI (RR, 0.27) includes clinically important benefit (RR<0.9), while the  
18 695 upper bound of the 95% CI (RR, 2.87) crosses the minimally important difference of 10% (RR>1.1).  
19  
20  
21  
22  
23  
24  
25  
26  
27  
28  
29  
30  
31  
32  
33  
34  
35  
36  
37  
38  
39  
40  
41  
42  
43  
44  
45  
46  
47

**Figure 1** Flow of the literature search for the effect of food sources of sugar intake on incident gout and hyperuricemia.

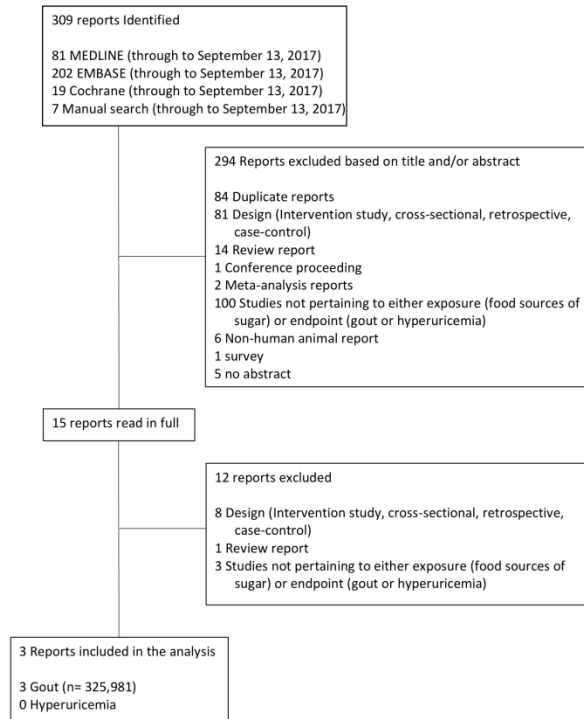

Figure 1. Summary of evidence search and selection. Flow of the literature search for the effect of food sources of sugar intake on incident gout and hyperuricemia. Of the 280 studies initially identified, 265 were excluded based on title and/or abstract. The remainder were read in full by two independent reviewers; after, 12 were further excluded. Included in this analysis were three prospective cohort studies.

279x361mm (300 x 300 DPI)



Figure 2 Relation between intake of fruit, fruit juice and SSB incident gout.

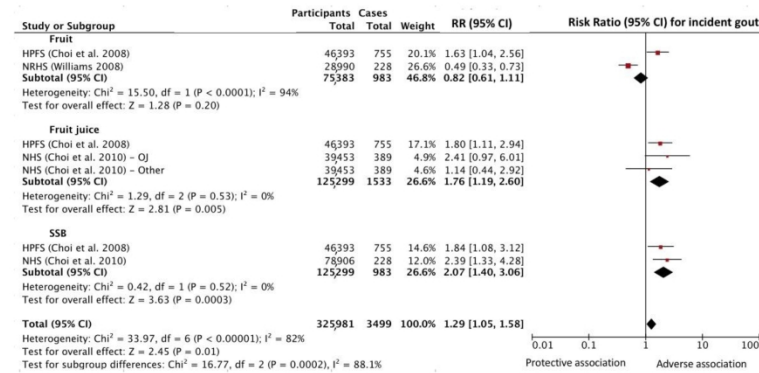

Figure 2. Relation between intake of fruit, fruit juice and SSB incident gout. Estimates from most-adjusted multivariate models accounting for food sources of fructose-containing sugars intake were used. The diamond represents the pooled effect estimate. Interstudy heterogeneity was tested using the Cochran Q statistic and quantified using the I<sup>2</sup> statistic (I<sup>2</sup> ≥ 50% indicative of significant heterogeneity). All results are presented as RR with 95% CI. OJ = orange juice. Other = other fruit juices.

279x361mm (300 x 300 DPI)

## Supplementary material

### SUPPLEMENTARY TABLES

**Supplementary table 1** Search terms

**Supplementary table 2** Analysis of confounding variables among 3 studies of food sources of sugar intake and incident gout

**Supplementary table 3** Newcastle-Ottawa Scale (NOS) for assessing the quality of cohort studies

### SUPPLEMENTARY FIGURES

**Supplementary figure 1** Linear and non-linear dose-response relationship between fruit juice intake and incident gout per serving/week

**Supplementary figure 2** Linear and non-linear dose-response relationship between SSB intake and incident gout per serving/week

## Supplementary table 1. Search terms

### Database and search terms

#### MEDLINE

1. sugar\*.mp.
2. exp fructose/
3. fructose.mp.
4. HFCS.mp.
5. exp high fructose Corn Syrup/
6. sucrose.mp.
7. exp dietary Sucrose/
8. sugar sweetened beverage\*.mp.
9. ssb.mp.
10. soda.mp.
11. soft drink\*.mp.
12. exp carbonated beverages/
13. carbonated beverages.mp.
14. non alcoholic beverage\*.mp.
15. nonalcoholic beverage\*.mp.
16. exp energy drinks/
17. energy drink\*.mp.
18. smoothie\*.mp.
19. exp "fruit and vegetable juices"/
20. fruit.mp.
21. exp fruit/
22. exp honey/
23. y\*g\*rt.mp.
24. exp yogurt/
25. ice cream\*.mp.
26. icecream\*.mp.
27. exp ice cream/
28. exp edible grain/
29. cereal\*.mp.
30. dessert\*.mp.
31. sweets.mp.
32. confection\*.mp.
33. pastries.mp.
34. biscuit\*.mp.
35. cookie\*.mp.
36. cake\*.mp.
37. candy.mp.
38. candies\*.mp.
39. exp candy/
40. (chocolate adj2 milk).mp.
41. chocolate.mp
42. exp chocolate/
43. cacao.mp
44. exp cacao/
45. cohort.mp.
46. exp prospective study/
47. (prospective adj2 (cohort or study)).mp.
48. exp multivariate analysis/
49. exp follow up studies/
50. exp proportional hazards models/

#### EMBASE

1. sugar\*.mp.
2. exp sugar/
3. exp fructose/
4. fructose.mp.
5. HFCS.mp.
6. exp high fructose Corn Syrup/
7. sucrose.mp.
8. exp dietary Sucrose/
9. sugar sweetened beverage\*.mp.
10. SSB.mp.
11. soda.mp.
12. soft drink\*.mp.
13. exp soft drink/
14. exp carbonated beverages/
15. carbonated beverages.mp.
16. non alcoholic beverage\*.mp.
17. nonalcoholic beverage\*.mp.
18. exp energy drinks/
19. energy drink\*.mp.
20. smoothie\*.mp.
21. exp "fruit and vegetable juices"/
22. fruit.mp.
23. exp fruit/
24. exp honey/
25. y\*g\*rt.mp.
26. exp yoghurt/
27. ice cream\*.mp.
28. icecream\*.mp.
29. exp ice cream/
30. cereal\*.mp.
31. dessert\*.mp.
32. sweets.mp.
33. confection\*.mp.
34. exp bakery product/
35. pastries.mp.
36. biscuit\*.mp.
37. cookie\*.mp.
38. cake\*.mp.
39. candy.mp.
40. candies\*.mp.
41. chocolate.mp
42. exp chocolate/
43. cacao.mp
44. exp cacao/
45. (chocolate adj2 milk).mp.
46. cohort.mp.
47. exp prospective study/
48. (prospective adj2 (cohort or study)).mp.
49. exp multivariate analysis/
50. exp proportional hazards models/

#### Cochrane

1. sugar\*.mp.
2. exp fructose/
3. fructose.mp.
4. HFCS.mp.
5. exp Nutritive Sweeteners/
6. sucrose.mp.
7. exp dietary sucrose/
8. sugar sweetened beverage\*.mp.
9. ssb.mp.
10. soda.mp.
11. soft drink\*.mp.
12. exp carbonated beverages/
13. non alcoholic beverage\*.mp.
14. nonalcoholic beverage\*.mp.
15. exp energy drinks/
16. energy drink\*.mp.
17. smoothie\*.mp.
18. ((fruit or vegetable) and juice\*).mp.
19. fruit.mp.
20. exp fruit/
21. exp honey/
22. y\*g\*rt.mp.
23. exp yogurt/
24. ice cream\*.mp.
25. icecream\*.mp.
26. exp ice cream/
27. cereal\*.mp.
28. dessert\*.mp.
29. sweets.mp.
30. confection\*.mp.
31. pastries.mp.
32. biscuit\*.mp.
33. cookie\*.mp.
34. cake\*.mp.
35. candy.mp.
36. candies.mp.
37. exp candy/
38. (chocolate adj2 milk).mp.
39. cohort.mp.
40. exp Prospective Studies/
41. chocolate.mp
42. cacao.mp
43. exp cacao/
44. (prospective adj2 (cohort or study)).mp.
45. exp follow-up studies/
46. exp multivariate analysis/
47. exp proportional hazards models/
48. follow up study.mp.
49. (longitudinal adj2 study).mp.
50. gout/

1  
2  
3 51. follow-up study.mp. 51. follow-up study.mp. 51. gout\*.mp  
4 52. (longitudinal adj2 study).mp. 52. (longitudinal adj2 study).mp. 52. uric acid\*.mp  
5 53. gout/ 53. gout/ 53. hyperuricemia\*.mp  
6 54. gout\*.mp. 54. gout\*.mp. 54. hyperuricemia/  
7 55. uric acid\*.mp. 55. uric acid\*.mp. 55. hyperuricaemia\*.mp  
8 56. hyperuricemia\*.mp. 56. hyperuricemia\*.mp. 56. uric.mp  
9 57. hyperuricemia/ 57. hyperuricemia/ 57. or/1-43  
10 58. hyperuricaemia\*.mp. 58. hyperuricaemia\*.mp. 58. or/44-49  
11 59. uric.mp. 59. uric.mp. 59. or/50-56  
12 60. or/1-44 60. or/1-45 60. and/57-59  
13 61. or/45-52 61. or/46-52  
14 62. or/53-59 62. or/53-59  
15 63. and/60-62 63. and/60-62

| Database                     | Total      |
|------------------------------|------------|
| MEDLINE: September 13, 2017  | 81         |
| EMBASE: September 13, 2017   | 202        |
| Cochrane: September 13, 2017 | 19         |
| Manual search                | 7          |
| <b>Total</b>                 | <b>309</b> |

For all databases, the original search was September 13, 2017.

**Supplementary table 2.** Analysis of confounding variables among 3 studies of food sources of sugar intake and incident gout

| Study                                                                                           | HPFS (Choi <i>et al.</i> , 2008) | NRHS (Williams, 2008) | NHS (Choi <i>et al.</i> , 2010) |
|-------------------------------------------------------------------------------------------------|----------------------------------|-----------------------|---------------------------------|
| Number of variables in fully adjusted model                                                     | 14                               | 6                     | 14                              |
| Number of multivariable models presented                                                        | 2                                | 1                     | 3                               |
| Timing of measurement of confounding variables                                                  | 2y                               | BL*                   | 2y                              |
| <b>Pre-specified primary confounding variable</b>                                               |                                  |                       |                                 |
| Age                                                                                             | ✓                                | ✓                     | ✓                               |
| <b>Pre-specified secondary confounding variables</b>                                            |                                  |                       |                                 |
| Marker of overweight/obesity (Body mass index, weight, waist circumference, waste to hip ratio) | ✓                                |                       | ✓                               |
| Sex                                                                                             | M §                              | M §                   | F ‡                             |
| History of gout/hyperuricemia                                                                   |                                  |                       |                                 |
| Diabetes                                                                                        |                                  |                       |                                 |
| Physical activity                                                                               |                                  |                       |                                 |
| Lipid medication/dyslipidemia                                                                   |                                  |                       |                                 |
| Animal protein intake                                                                           | ✓                                |                       | ✓                               |
| Hypertension or blood pressure medication including diuretics                                   | ✓                                |                       | ✓                               |
| <b>Other confounding variables</b>                                                              |                                  |                       |                                 |
| <b>Lifestyle factors</b>                                                                        |                                  |                       |                                 |
| Weekly intake of:                                                                               |                                  |                       |                                 |
| Alcohol                                                                                         | ✓                                | ✓                     | ✓                               |
| Seafood                                                                                         | ✓                                |                       | ✓                               |
| Purine from vegetables                                                                          | ✓                                |                       | ✓                               |
| Dairy food                                                                                      | ✓                                |                       | ✓                               |
| Vitamin C                                                                                       | ✓                                |                       | ✓                               |
| Coffee                                                                                          |                                  | ✓                     |                                 |
| Meat                                                                                            |                                  | ✓                     |                                 |
| Fish                                                                                            |                                  |                       | ✓∇                              |
| Diet soda                                                                                       | ✓∇                               |                       | ✓∇                              |
| Sugar-sweetened cola                                                                            | ✓∇                               |                       | ✓∇                              |
| Other soda                                                                                      | ✓∇                               |                       | ✓∇                              |
| Orange or apple juice                                                                           | ✓∇                               |                       | ✓∇                              |
| Other fruit juice                                                                               |                                  |                       | ✓∇                              |
| Orange or apple                                                                                 | ✓∇                               |                       |                                 |
| Total energy                                                                                    | ✓                                |                       | ✓                               |
| Weekly intake of aspirin                                                                        |                                  | ✓                     |                                 |
| <b>Medical history</b>                                                                          |                                  |                       |                                 |
| History of Hypertension                                                                         | ✓                                | ✓                     | ✓                               |
| History of chronic Renal failure                                                                | ✓                                |                       |                                 |
| Menopause status                                                                                |                                  |                       | ✓                               |
| Use of hormonal therapy                                                                         |                                  |                       | ✓                               |

HPFS=Health Professionals Follow-Up Study, NHS=Nurses Health Study

\*Denotes confounders measured only at baseline years.

† Indicates confounders measured every 2 years.

‡ Indicates the study includes only female subjects

§ Indicates the study includes only male subjects

∇ Indicates the confounder was present in some, but not all, models.

**Supplementary table 3.** Newcastle-Ottawa Scale (NOS) for assessing the quality of cohort studies

| Study                     | Selection* | Outcome† | Comparability‡ | total§ |
|---------------------------|------------|----------|----------------|--------|
| Choi <i>et al.</i> , 2008 | 2          | 3        | 1              | 6      |
| Williams, 2008            | 2          | 2        | 1              | 5      |
| Choi <i>et al.</i> , 2010 | 2          | 3        | 1              | 6      |

\*Maximum 4 points awarded for cohort representativeness, selection of non-exposed cohort, exposure assessment and demonstration outcome not present at baseline.

†Maximum 3 points awarded for follow-up length, adequacy of follow-up and outcome assessment.

‡Maximum 2 points awarded for controlling for the pre-specified primary confounding variable (age) and >6 of the secondary confounding variables (sex, body mass index, history of gout or hyperuricemia, diabetes, alcohol, physical activity, lipid medication/dyslipidemia, animal protein intake, hypertension or blood pressure medication including diuretics).

§A maximum of 9 points could be awarded.

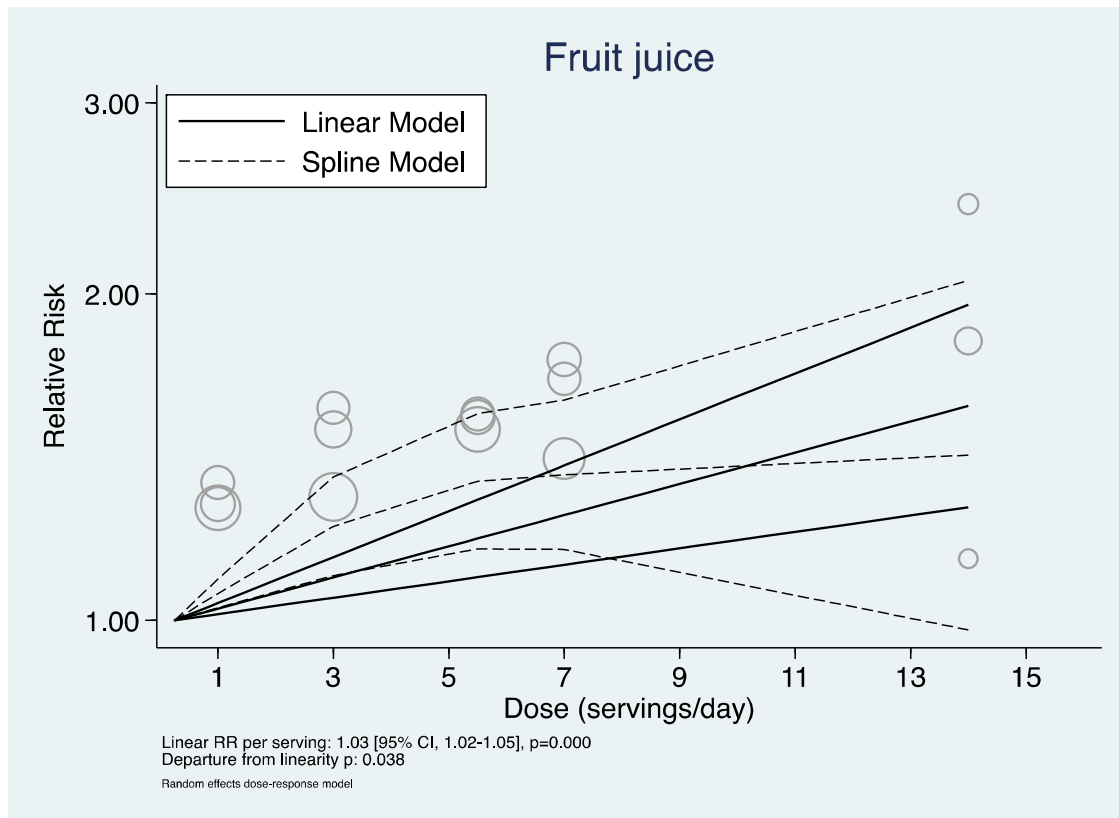

28 **supplementary figure 2.** Linear and non-linear dose-response relationship between fruit juice intake  
29 and incident gout per serving/week. Linear dose response data were modeled using the generalized least  
30 squares trend estimation models (GLST). Dashed lines represent the pointwise 95% confidence interval  
31 for the fitted linear trend (solid line). Each study was centered to the baseline reference dose for the  
32 estimation of increasing dose risk. Non-linear dose response data were modeled with the fixed-effect  
33 restricted cubic spline models with 3 knots using the spline curve modeling (MKSPLINE procedure).  
34 Dashed lines represent the pointwise 95% confidence interval for the fitted linear trend (solid line). Each  
35 study was centered to the baseline reference dose for the estimation of increasing dose risk.  
36

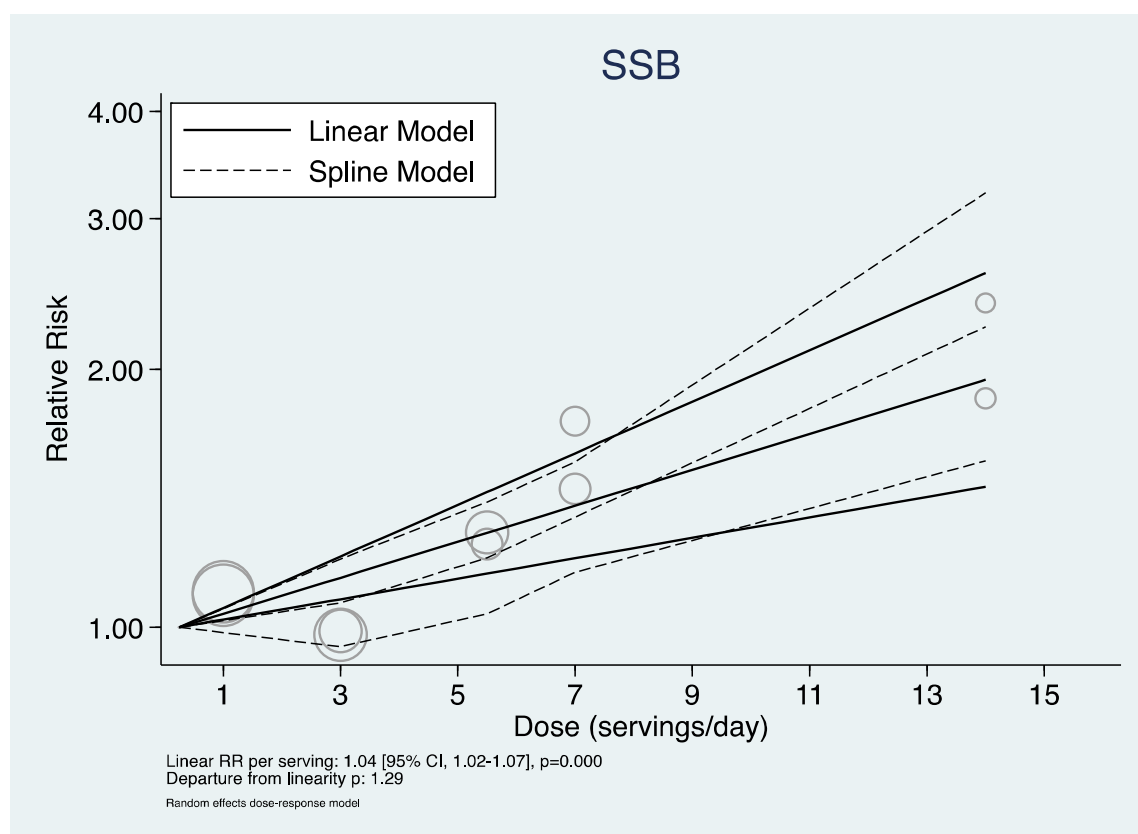

28 **Supplementary figure 1.** Linear and non-linear dose-response relationship between SSB intake and  
 29 incident gout per serving/week. Linear dose response data were modeled using the generalized least  
 30 squares trend estimation models (GLST). Dashed lines represent the pointwise 95% confidence interval  
 31 for the fitted linear trend (solid line). Each study was centered to the baseline reference dose for the  
 32 estimation of increasing dose risk. Non-linear dose response data were modeled with the fixed-effect  
 33 restricted cubic spline models with 3 knots using the spline curve modeling (MKSPLINE procedure).  
 34 Dashed lines represent the pointwise 95% confidence interval for the fitted linear trend (solid line). Each  
 35 study was centered to the baseline reference dose for the estimation of increasing dose risk.  
 36  
 37  
 38  
 39  
 40  
 41  
 42  
 43  
 44  
 45  
 46  
 47  
 48  
 49  
 50  
 51  
 52  
 53  
 54  
 55  
 56  
 57  
 58  
 59  
 60



## MOOSE Checklist for Meta-analyses of Observational Studies

| Item No                                     | Recommendation                                                                                                                                                                                                                                                               | Reported on Page No      |
|---------------------------------------------|------------------------------------------------------------------------------------------------------------------------------------------------------------------------------------------------------------------------------------------------------------------------------|--------------------------|
| Reporting of background should include      |                                                                                                                                                                                                                                                                              |                          |
| 1                                           | Problem definition                                                                                                                                                                                                                                                           | 4                        |
| 2                                           | Hypothesis statement                                                                                                                                                                                                                                                         | -                        |
| 3                                           | Description of study outcome(s)                                                                                                                                                                                                                                              | 4, 5                     |
| 4                                           | Type of exposure or intervention used                                                                                                                                                                                                                                        | 5                        |
| 5                                           | Type of study designs used                                                                                                                                                                                                                                                   | 5                        |
| 6                                           | Study population                                                                                                                                                                                                                                                             | 5                        |
| Reporting of search strategy should include |                                                                                                                                                                                                                                                                              |                          |
| 7                                           | Qualifications of searchers (eg, librarians and investigators)                                                                                                                                                                                                               | 5, Title page            |
| 8                                           | Search strategy, including time period included in the synthesis and key words                                                                                                                                                                                               | 5, supplementary table 1 |
| 9                                           | Effort to include all available studies, including contact with authors                                                                                                                                                                                                      | 5                        |
| 10                                          | Databases and registries searched                                                                                                                                                                                                                                            | 5                        |
| 11                                          | Search software used, name and version, including special features used (eg, explosion)                                                                                                                                                                                      | 6                        |
| 12                                          | Use of hand searching (eg, reference lists of obtained articles)                                                                                                                                                                                                             | 5                        |
| 13                                          | List of citations located and those excluded, including justification                                                                                                                                                                                                        | 7, 8, Fig 1              |
| 14                                          | Method of addressing articles published in languages other than English                                                                                                                                                                                                      | -                        |
| 15                                          | Method of handling abstracts and unpublished studies                                                                                                                                                                                                                         | 5                        |
| 16                                          | Description of any contact with authors                                                                                                                                                                                                                                      | -                        |
| Reporting of methods should include         |                                                                                                                                                                                                                                                                              |                          |
| 17                                          | Description of relevance or appropriateness of studies assembled for assessing the hypothesis to be tested                                                                                                                                                                   | 7-9                      |
| 18                                          | Rationale for the selection and coding of data (eg, sound clinical principles or convenience)                                                                                                                                                                                | 5                        |
| 19                                          | Documentation of how data were classified and coded (eg, multiple raters, blinding and interrater reliability)                                                                                                                                                               | 5                        |
| 20                                          | Assessment of confounding (eg, comparability of cases and controls in studies where appropriate)                                                                                                                                                                             | 9, supplementary table 2 |
| 21                                          | Assessment of study quality, including blinding of quality assessors, stratification or regression on possible predictors of study results                                                                                                                                   | 9, supplementary table 3 |
| 22                                          | Assessment of heterogeneity                                                                                                                                                                                                                                                  | 6, 7                     |
| 23                                          | Description of statistical methods (eg, complete description of fixed or random effects models, justification of whether the chosen models account for predictors of study results, dose-response models, or cumulative meta-analysis) in sufficient detail to be replicated | 6, 7                     |
| 24                                          | Provision of appropriate tables and graphics                                                                                                                                                                                                                                 | Tables 1, 2, Figs 1, 2   |
| Reporting of results should include         |                                                                                                                                                                                                                                                                              |                          |
| 25                                          | Graphic summarizing individual study estimates and overall estimate                                                                                                                                                                                                          | Figs 2                   |
| 26                                          | Table giving descriptive information for each study included                                                                                                                                                                                                                 | Table 1                  |
| 27                                          | Results of sensitivity testing (eg, subgroup analysis)                                                                                                                                                                                                                       | -                        |

|    |                                                   |             |
|----|---------------------------------------------------|-------------|
| 28 | Indication of statistical uncertainty of findings | 11, table 2 |
|----|---------------------------------------------------|-------------|

| Item No                                 | Recommendation                                                                                                            | Reported on Page No |
|-----------------------------------------|---------------------------------------------------------------------------------------------------------------------------|---------------------|
| Reporting of discussion should include  |                                                                                                                           |                     |
| 29                                      | Quantitative assessment of bias (eg, publication bias)                                                                    | 10, 16              |
| 30                                      | Justification for exclusion (eg, exclusion of non-English language citations)                                             | 5                   |
| 31                                      | Assessment of quality of included studies                                                                                 | 16                  |
| Reporting of conclusions should include |                                                                                                                           |                     |
| 32                                      | Consideration of alternative explanations for observed results                                                            | 11-17               |
| 33                                      | Generalization of the conclusions (ie, appropriate for the data presented and within the domain of the literature review) | 16, 17              |
| 34                                      | Guidelines for future research                                                                                            | 16, 17              |
| 35                                      | Disclosure of funding source                                                                                              | 17, 18              |

From: Stroup DF, Berlin JA, Morton SC, et al, for the Meta-analysis Of Observational Studies in Epidemiology (MOOSE) Group. Meta-analysis of Observational Studies in Epidemiology. A Proposal for Reporting. *JAMA*. 2000;283(15):2008-2012. doi: 10.1001/jama.283.15.2008.

# BMJ Open

## Important food sources of fructose-containing sugars and incident gout: A systematic review and meta-analysis of prospective cohort studies

|                                 |                                                                                                                                                                                                                                                                                                                                                                                                                                                                                                                                                                                                                                                                                                                                                                                                                                                                                                                                                                                                                                                                                                                                                                                                                                                                                                                                                                                                                                                                                                                                                                                                                                                                                                                                                                                                                                                                                                                                                                                                                                                                                                                                                                                                                                                                                                                                                                                                              |
|---------------------------------|--------------------------------------------------------------------------------------------------------------------------------------------------------------------------------------------------------------------------------------------------------------------------------------------------------------------------------------------------------------------------------------------------------------------------------------------------------------------------------------------------------------------------------------------------------------------------------------------------------------------------------------------------------------------------------------------------------------------------------------------------------------------------------------------------------------------------------------------------------------------------------------------------------------------------------------------------------------------------------------------------------------------------------------------------------------------------------------------------------------------------------------------------------------------------------------------------------------------------------------------------------------------------------------------------------------------------------------------------------------------------------------------------------------------------------------------------------------------------------------------------------------------------------------------------------------------------------------------------------------------------------------------------------------------------------------------------------------------------------------------------------------------------------------------------------------------------------------------------------------------------------------------------------------------------------------------------------------------------------------------------------------------------------------------------------------------------------------------------------------------------------------------------------------------------------------------------------------------------------------------------------------------------------------------------------------------------------------------------------------------------------------------------------------|
| Journal:                        | <i>BMJ Open</i>                                                                                                                                                                                                                                                                                                                                                                                                                                                                                                                                                                                                                                                                                                                                                                                                                                                                                                                                                                                                                                                                                                                                                                                                                                                                                                                                                                                                                                                                                                                                                                                                                                                                                                                                                                                                                                                                                                                                                                                                                                                                                                                                                                                                                                                                                                                                                                                              |
| Manuscript ID                   | bmjopen-2018-024171.R1                                                                                                                                                                                                                                                                                                                                                                                                                                                                                                                                                                                                                                                                                                                                                                                                                                                                                                                                                                                                                                                                                                                                                                                                                                                                                                                                                                                                                                                                                                                                                                                                                                                                                                                                                                                                                                                                                                                                                                                                                                                                                                                                                                                                                                                                                                                                                                                       |
| Article Type:                   | Research                                                                                                                                                                                                                                                                                                                                                                                                                                                                                                                                                                                                                                                                                                                                                                                                                                                                                                                                                                                                                                                                                                                                                                                                                                                                                                                                                                                                                                                                                                                                                                                                                                                                                                                                                                                                                                                                                                                                                                                                                                                                                                                                                                                                                                                                                                                                                                                                     |
| Date Submitted by the Author:   | 31-Oct-2018                                                                                                                                                                                                                                                                                                                                                                                                                                                                                                                                                                                                                                                                                                                                                                                                                                                                                                                                                                                                                                                                                                                                                                                                                                                                                                                                                                                                                                                                                                                                                                                                                                                                                                                                                                                                                                                                                                                                                                                                                                                                                                                                                                                                                                                                                                                                                                                                  |
| Complete List of Authors:       | <p>Ayoub-Charette, Sabrina; Toronto 3D Knowledge Synthesis and Clinical Trials Unit, Clinical Nutrition and Risk Factor Modification Centre, St. Michael's Hospital, Toronto, Ontario, Canada; Department of Nutritional Sciences, Faculty of Medicine, University of Toronto, Toronto, Ontario, Canada</p> <p>Liu, Qi; Toronto 3D Knowledge Synthesis and Clinical Trials Unit, Clinical Nutrition and Risk Factor Modification Centre, St. Michael's Hospital, Toronto, Ontario, Canada; Department of Nutritional Sciences, Faculty of Medicine, University of Toronto, Toronto, Ontario, Canada</p> <p>Khan, Tauseef ; Toronto 3D Knowledge Synthesis and Clinical Trials Unit, Clinical Nutrition and Risk Factor Modification Centre, St. Michael's Hospital, Toronto, Ontario, Canada; Department of Nutritional Sciences, Faculty of Medicine, University of Toronto, Toronto, Ontario, Canada</p> <p>Au-Yeung, Fei; Toronto 3D Knowledge Synthesis and Clinical Trials Unit, Clinical Nutrition and Risk Factor Modification Centre, St. Michael's Hospital, Toronto, Ontario, Canada; Department of Nutritional Sciences, Faculty of Medicine, University of Toronto, Toronto, Ontario, Canada</p> <p>Blanco Mejia, Sonia; Clinical Nutrition and Risk Factor Modification Centre, St. Michael's Hospital; Toronto 3D Knowledge Synthesis and Clinical Trials Unit, St. Michael's Hospital</p> <p>de Souza, Russell; Toronto 3D Knowledge Synthesis and Clinical Trials Unit, Clinical Nutrition and Risk Factor Modification Centre, St. Michael's Hospital, Toronto, Ontario, Canada; McMaster University, Department of Health Research Methods, Evidence, and Impact, Hamilton, Ontario, Canada</p> <p>Wolever, Thomas M. S.; Department of Nutritional Sciences, Faculty of Medicine, University of Toronto, Toronto, Ontario, Canada; Division of Endocrinology and Metabolism, St. Michael's Hospital, Toronto, Ontario, Canada</p> <p>Leiter, Lawrence; Division of Endocrinology and Metabolism, St. Michael's Hospital, Toronto, Ontario, Canada; Li Ka Shing Knowledge Institute, St. Michael's Hospital, Toronto, Ontario, Canada</p> <p>Kendall, Cyril; University of Toronto, Nutritional Sciences</p> <p>Sievenpiper, John; McMaster University, Department of Pathology and Molecular Medicine; St. Michael's Hospital, Clinical Nutrition and Risk Factor Modification Centre</p> |
| <b>Primary Subject Heading</b>: | Nutrition and metabolism                                                                                                                                                                                                                                                                                                                                                                                                                                                                                                                                                                                                                                                                                                                                                                                                                                                                                                                                                                                                                                                                                                                                                                                                                                                                                                                                                                                                                                                                                                                                                                                                                                                                                                                                                                                                                                                                                                                                                                                                                                                                                                                                                                                                                                                                                                                                                                                     |

1  
2  
3  
4  
5  
6  
7  
8  
9  
10  
11  
12  
13  
14  
15  
16  
17  
18  
19  
20  
21  
22  
23  
24  
25  
26  
27  
28  
29  
30  
31  
32  
33  
34  
35  
36  
37  
38  
39  
40  
41  
42  
43  
44  
45  
46  
47  
48  
49  
50  
51  
52  
53  
54  
55  
56  
57  
58  
59  
60

|                            |                                                                                                                    |
|----------------------------|--------------------------------------------------------------------------------------------------------------------|
| Secondary Subject Heading: | Rheumatology, Diabetes and endocrinology                                                                           |
| Keywords:                  | uric acid, systematic review and meta-analysis, gout, sugars, fructose, food sources of fructose containing sugars |
|                            |                                                                                                                    |

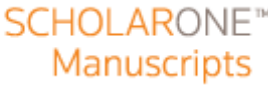

1  
2 1 **Important food sources of fructose-containing sugars and incident gout:**  
3 2 **A systematic review and meta-analysis of prospective cohort studies**  
4 3  
5 4  
6 5  
7 6

8 5 **Sabrina Ayoub-Charette<sup>1,2</sup>, Qi Liu<sup>1,2</sup>, Tauseef Ahmad Khan<sup>1,2</sup>, Fei Au-Yeung<sup>1,2</sup>, Sonia Blanco Mejia<sup>1,2</sup>,**  
9  
10 6 **Russell J de Souza<sup>1,2,4</sup>, Thomas MS Wolever<sup>1,2,3,5</sup>, Lawrence A Leiter<sup>1,2,3,5</sup>, Cyril WC Kendall<sup>1,2,6</sup>, John L.**  
11  
12 7 **Sievenpiper<sup>1,2,3,5</sup>**  
13  
14 8  
15 9

17 10 <sup>1</sup>Toronto 3D Knowledge Synthesis and Clinical Trials Unit, Clinical Nutrition and Risk Factor  
18  
19 11 Modification Centre, St. Michael's Hospital, Toronto, Ontario, Canada, <sup>2</sup>Department of Nutritional  
20  
21 12 Sciences, Faculty of Medicine, University of Toronto, Toronto, Ontario, Canada, <sup>3</sup>Division of  
22  
23 13 Endocrinology and Metabolism, St. Michael's Hospital, Toronto, Ontario, Canada, <sup>4</sup>McMaster  
24  
25 14 University, Department of Health Research Methods, Evidence, and Impact, Hamilton, Ontario,  
26  
27 15 Canada, <sup>5</sup>Li Ka Shing Knowledge Institute, St. Michael's Hospital, Toronto, Ontario, Canada, <sup>6</sup>College  
28 16 of Pharmacy and Nutrition, University of Saskatchewan, Saskatoon, Saskatchewan, Canada.  
29  
30 17  
31  
32 18  
33  
34 19  
35 20  
36  
37 21  
38  
39 22  
40  
41 23  
42

43 24 **Corresponding Author:**

44  
45 25 John L Sievenpiper MD, PhD, FRCPC, Toronto 3D Knowledge Synthesis and Clinical Trials Unit, St.  
46 26 Michael's Hospital, 6137-61 Queen Street East, Toronto, ON, M5C 2T2, CANADA, Tel: +1-416 867-  
47 27 3732, Fax: 416 867 7495, email: [john.sievenpiper@utoronto.ca](mailto:john.sievenpiper@utoronto.ca)  
48 28

49 29 **Number of Figures:** 2

50 30 **Number of Tables:** 2

51 31 **Supplemental Material:** 3 Tables and 2 Figures

52 32 **Abstract Word Count:** 296

53 33 **Manuscript Word Count:** 3,835

54 34 **Key Words:** sugars, fructose, food sources of fructose containing sugars, gout, uric acid and  
55 35 systematic review, meta-analysis  
56  
57  
58  
59

1  
2 36 **ABSTRACT**

3  
4 37 **Objective:** Sugar-sweetened beverages (SSBs) are associated with hyperuricemia and gout. Whether  
5  
6  
7 38 other important food sources of sugars share this association is unclear.

8  
9 39 **Design:** To assess the relation of important food-sources of fructose-containing sugars with incident  
10  
11  
12 40 gout and hyperuricemia, we conducted a systematic review and meta-analysis of prospective cohort  
13  
14 41 studies.

15  
16 42 **Methods:** We searched MEDLINE, EMBASE and the Cochrane Library (through September 13, 2017).  
17  
18  
19 43 We included prospective cohort studies that investigated the relationship between food sources of  
20  
21  
22 44 sugar and incident gout or hyperuricemia. Two independent reviewers extracted relevant data and  
23  
24 45 assessed risk of bias. We pooled natural-log transformed risk ratios (RRs) using the generic inverse  
25  
26 46 variance method with random effects model and expressed as RR with 95% confidence intervals (CIs).  
27  
28  
29 47 The overall quality of the evidence was assessed using the Grading of Recommendations Assessment,  
30  
31 48 Development and Evaluation (GRADE) system.

32  
33  
34 49 **Results:** We identified three studies (154,289 participants, 1,761 cases of gout), comparing the  
35  
36 50 highest with the lowest level of exposure for SSBs, fruit juice and fruits. No reports were found  
37  
38  
39 51 reporting incident hyperuricemia. Fruit juice and SSB intake showed an adverse association (fruit  
40  
41 52 juice, RR = 1.77, 95% CI 1.20 to 2.61; SSB, RR = 2.08, 95% CI 1.40 to 3.08), when comparing the highest  
42  
43  
44 53 to lowest intake of the most adjusted models. There was no significant association between fruit  
45  
46 54 intake and gout (RR 0.85, 95% CI 0.63 to 1.14). Strongest evidence was for the adverse association in  
47  
48 55 SSB (moderate quality), and the weakest evidence was for the adverse association in fruit juice (very  
49  
50  
51 56 low quality) and the no effect in fruit intake (very low quality).

52  
53 57 **Conclusion:** The adverse association of SSB is also seen for fruit juice consumption but does not  
54  
55  
56 58 extend to fruit intake. Further research is likely to improve our estimates.

1  
2 59 **Protocol registration:** ClinicalTrials.gov identifier: NCT02702375  
3  
4  
5 60

6  
7 61 **STRENGTHS AND LIMITATIONS OF THIS STUDY**  
8

- 9 62 - This systematic review and meta-analysis assessed the quality of the evidence using the  
10  
11 Grading of Recommendations Assessment, Development and Evaluation (GRADE) system.  
12 63  
13  
14 64 - Large prospective cohort studies that were of high quality and had a long duration of follow-up  
15  
16 were included.  
17 65  
18  
19 66 - Most of the pooled results showed good consistency (low between study heterogeneity) and  
20  
21 sugar sweetened beverages showed evidence of a dose-response gradient.  
22 67  
23  
24 68 - Only three prospective cohort studies with low external generalizability were available for  
25  
26 inclusion.  
27 69  
28  
29 70 - The observational design of the prospective cohort studies did not allow for causal inferences  
30  
31 to be drawn.  
32 71  
33  
34 72  
35  
36 73  
37  
38 74  
39  
40  
41 75  
42  
43 76  
44  
45  
46 77  
47  
48 78  
49  
50  
51 79  
52  
53 80  
54  
55  
56 81  
57  
58  
59  
60

## 1 2 82 **INTRODUCTION**

3  
4 83 Gout and associated hyperuricemia are both associated with the development of hypertension,  
5  
6  
7 84 insulin resistance syndrome [1], and cardiovascular disease (CVD) [2]. Different diets have been  
8  
9 85 shown to be associated with the development and severity of gout [3]. Foods that increase net ATP  
10  
11  
12 86 degradation including alcohol and high purine meats, are risk factors for gout [1]. Ingestion of large  
13  
14 87 amounts of the monosaccharide fructose can increase uric acid production during its metabolism in  
15  
16  
17 88 the liver through unregulated phosphorylation of ATP into AMP [1] as demonstrated in randomized  
18  
19 89 controlled trials [4, 5]. Similarly, in cohort studies, high intake of fructose-containing sugars in the  
20  
21  
22 90 form of sugar-sweetened beverages (SSBs) is associated with incident gout [6]. It is unclear whether  
23  
24 91 the association seen for SSBs holds for other important food-sources of fructose-containing sugars,  
25  
26  
27 92 such as fruit and fruit-based products, grains and grain-based products, dairy and dairy-based  
28  
29 93 products and sweets and desserts. As dietary guidelines and public health policy move from nutrient-  
30  
31 94 based recommendations toward food and dietary-based recommendations [3, 4, 7], it is important to  
32  
33  
34 95 understand the contribution of these different food sources of fructose-containing sugars to the  
35  
36 96 association of incident gout. To address this gap, we conducted a systematic review and meta-analysis  
37  
38  
39 97 of prospective cohort studies of the relation of important food sources of fructose-containing sugars  
40  
41 98 with incident gout and hyperuricemia.

## 43 99 44 45 46 100 **METHOD**

### 47 48 101 **Design**

49  
50  
51 102 We followed the Cochrane Handbook for Systematic Reviews of Interventions [8] for the conduct of  
52  
53 103 our systematic review and meta-analysis and reported our results according to the Meta-analysis of  
54  
55  
56 104 Observational Studies in Epidemiology (MOOSE) guidelines [9] and preferred Reporting Items for  
57  
58  
59



1  
2 105 Systematic Reviews and Meta-Analysis (PRISMA) [10] guidelines. The study protocol was registered at  
3  
4 106 ClinicalTrials.gov (identifier, NCT02702375).

### 9 108 **Search strategy**

11  
12 109 We conducted systematic searches in MEDLINE, EMBASE and Cochrane through September 13, 2017  
13  
14 110 with no language restriction (**supplementary table 1**). Targeted manual searches served to  
15  
16 111 supplement the database search; these included finding related papers from references of review  
17  
18 112 papers, included studies, perusing articles with data from major prospective cohorts that usually  
19  
20 113 report dietary data, and speaking to experts in the field.  
21  
22  
23

### 26 115 **Study selection**

28  
29 116 We included prospective cohort studies of  $\geq$ one-year duration that assessed the association of  
30  
31 117 important food sources of fructose-containing sugars including non-alcoholic beverages (SSBs), cereal  
32  
33 118 grain and grain based products, fruit and fruit-based products, dairy and dairy-based products, and  
34  
35 119 sweets, chocolate and desserts with incident gout or hyperuricemia in participants free from gout or  
36  
37 120 hyperuricemia at the start of the study. One-year duration was chosen as it allows for the  
38  
39  
40 121 development of diseases such as hyperuricemia and gout.  
42  
43  
44

### 46 123 **Data extraction**

47  
48 124 Two independent reviewers (SAC and QL) extracted relevant data from included studies onto  
49  
50 125 standardized pro forma. Extracted data included sample size, subject characteristics, sources of  
51  
52 126 fructose-containing sugars, exposure levels, duration of follow-up, number of gout or hyperuricemia  
53  
54 127 cases, model adjustments, and the risk ratio with 95% confidence intervals (95% CI) per quantile of  
55  
56  
57  
58  
59  
60

1  
2 128 intake. The main outcome was incident gout or hyperuricemia expressed as risk ratios (RR) with 95%  
3  
4 129 confidence intervals (95% CI). Discrepancies were resolved by consensus.  
5  
6

7 130

8

### 9 131 **Risk of bias**

10

11  
12 132 The same two independent reviewers (SAC and QL) assessed each study for risk of bias. Risk of bias  
13  
14 133 was assessed using the Newcastle-Ottawa Scale (NOS) for prospective cohort studies. Points were  
15  
16  
17 134 awarded based on cohort selection, comparability of groups and assessment of outcomes, for a  
18  
19 135 maximum total of 9 points [11]. Studies with  $\geq 6$  points were considered high quality [11]. Difference  
20  
21  
22 136 between reviewers was resolved by consensus.  
23

24 137

25

### 26 138 **Statistical analyses**

27

28  
29 139 Primary pooled analyses were conducted using Review Manager (RevMan) 5.3 (The Nordic Cochrane  
30  
31 140 Centre, The Cochrane Collaboration, Copenhagen, Denmark). Sensitivity analysis and the assessments  
32  
33  
34 141 of dose response were performed using Stata 14 (StataCorp, College Station, TX, USA). Natural log-  
35  
36 142 transformed RR for incident gout or hyperuricemia, comparing extreme quantiles (the highest  
37  
38  
39 143 exposure versus the lowest exposure or reference group), were pooled separately for each food  
40  
41 144 source of fructose-containing sugars using the generic inverse variance method with DerSimonian and  
42  
43  
44 145 Laird random effects models and expressed as RRs with 95% CI. To overcome a unit-of-analysis error  
45  
46 146 for studies appearing more than once in the same analysis, we divided participants equally among the  
47  
48  
49 147 multiple comparisons and readjusted the log-standard errors [8]. Inter-study heterogeneity was  
50  
51 148 assessed with the Cochran Q statistic with significance set at  $p < 0.10$  and quantified with the  $I^2$   
52  
53 149 statistic, where  $I^2 \geq 50\%$  represented evidence of substantial heterogeneity [8]. Interaction between  
54  
55  
56 150 food sources was assessed using Cochran Q statistic for between group interaction while adjusting  
57  
58  
59

60

1  
2 151 log-standard errors for units-of-analysis. We explored sources of heterogeneity by sensitivity analyses.  
3  
4 152 Sensitivity analyses, where each study was systematically removed, and effect size was recalculated in  
5  
6  
7 153 the remaining studies, were carried out to explore the impact of individual studies on the pooled risk.  
8  
9 154 As  $\geq 10$  cohort comparisons were not available, *a priori* subgroup analyses were not performed. Linear  
10  
11  
12 155 and non-linear dose-response analyses were assessed using generalized least squares trend  
13  
14 156 estimation models (GLST) and fixed-effects restricted cubic spline model with 3 knots, respectively  
15  
16  
17 157 [12]. Publication bias was not assessed as the number of cohort comparisons was less than 10.  
18  
19 158

### 21 159 **Grading of the evidence**

24 160 The overall quality and the strength of the evidence was assessed using the Grading of  
25  
26 161 Recommendations Assessment, Development and Evaluation (GRADE) system [13-25]. The evidence  
27  
28  
29 162 was graded as high, moderate, low, or very low quality, with observational studies starting with an  
30  
31 163 initial grade of 'low'. This then can be downgraded based on 5 pre-specified criteria or upgraded  
32  
33  
34 164 based on 3 pre-specified criteria. Criteria to downgrade included risk of bias (weight of studies  
35  
36 165 showed risk of bias as assessed by low NOS  $< 6$ ), inconsistency (substantial unexplained inter-study  
37  
38  
39 166 heterogeneity i.e.  $I^2 > 50\%$ ), indirectness (presence of factors that limit the generalizability of the  
40  
41 167 results), imprecision in the pooled risk estimate (the 95% CI for risk estimates are wide or cross a  
42  
43  
44 168 minimally important difference of 10% for benefit or harm (RR 0.9–1.1)), and publication bias  
45  
46 169 (evidence of small-study effect). Conversely, criteria to upgrade included a large magnitude of effect  
47  
48 170 (RR  $> 2$  or RR  $< 0.5$  in the absence of plausible confounders), dose–response gradient or reasonable  
49  
50  
51 171 evidence of attenuation of the pooled effect estimate by confounders.  
52

### 53 172 **Patient and public involvement**

1  
2 174 Patients and the public were not involved in the study.

3  
4 175

## 5 6 7 176 **RESULTS**

### 8 9 177 **Search results**

10  
11  
12 178 **Figure 1** shows the flow of the systematic search and study selection. Of the 309 reports identified by  
13  
14 179 the literature search, three reports with data from three prospective cohort studies met our inclusion  
15  
16 180 criteria [26-28]: Nurses' Health Study (NHS) [27], Health Professionals Follow-up Study (HPFS) [26] and  
17  
18  
19 181 the National Runner's Health Study [28]. All three reports reported the association of food sources of  
20  
21 182 fructose-containing sugars on incident gout, but none on incident hyperuricemia. These reports  
22  
23  
24 183 involved a total of 154,289 participants with 1,761 incident cases of gout. Two reports each reported  
25  
26 184 data on fruit intake [n= 75,383; 983 cases] [26, 28], fruit juice [n= 125,299; 1,533 cases] [26, 27] and  
27  
28  
29 185 SSBs [n=125,299; 983 cases] [26, 27]. We did not identify prospective cohort studies reporting the  
30  
31 186 association of other food sources of fructose-containing sugars (e.g. cereal grain and grain-based  
32  
33  
34 187 products, sweets and desserts, dairy and dairy based products and chocolate) with incident gout  
35  
36 188 fitting our inclusion criteria.

### 37 38 39 189 40 41 190 **Study characteristics**

42  
43  
44 191 **Table 1** lists the characteristics of the included prospective cohort studies. All studies were performed  
45  
46 192 in the USA. The median age of the included participants ranged from 30 to 75. The median follow-up  
47  
48 193 period was 17 years (range, 12 to 22 years) for SSB, 18.7 years (12 to 22 years) for fruit juice and 9.9  
49  
50  
51 194 years (7.74 to 12 years) for fruit. Dietary intake assessments were done with self-reported, validated  
52  
53 195 food frequency questionnaires (FFQs) in all studies. Quantiles of exposure depended on the food  
54  
55  
56 196 source. Medians for the lowest and highest quantiles of exposure were <1 servings/month and ≥14

1  
2 197 servings/week respectively for SSB;  $\leq 1$  servings/month and  $\geq 14$  servings/week respectively for fruit  
3  
4 198 juice; and  $\leq 0.4$  servings/week (range,  $< 0-0.5$  servings/week) and  $\geq 8$  servings/day (range,  $\geq 2-14$   
5  
6  
7 199 servings/day), respectively for fruit. The ascertainment of incident gout in both HPFS and NHS cohorts  
8  
9 200 [26, 27] was through self-report, followed by supplementary surveys of the subjects based on the  
10  
11  
12 201 American College of Rheumatology gout survey criteria [29] to confirm that the diagnosis. The authors  
13  
14 202 defined individuals with gout that met  $\geq 6$  of the 11 criteria for gout. In addition, in a sub-sample the  
15  
16  
17 203 self-reported diagnoses were validated with medical records. As for the NRHS cohort [28], incident  
18  
19 204 gout was self-reported based upon physician diagnosis.  
20  
21  
22 205

23  
24 206 **Supplementary table 2** shows the complete list of adjusted confounding variables for the most  
25  
26 207 adjusted models for each of the included prospective cohorts. The median number of variables in the  
27  
28  
29 208 most adjusted models was 14 (range, 6 to 14). All studies adjusted for primary and secondary  
30  
31 209 confounders such as age, body mass index (BMI) and history of hypertension. Each of the three  
32  
33  
34 210 cohorts were single-sex studies, so adjustment for sex was not necessary. The NHS cohort study  
35  
36 211 authored by Choi *et al.* 2010 [27] and NRHS study by Williams *et al.* [28] were agency funded, while  
37  
38  
39 212 the HPFS paper authored by Choi *et al.* 2008 [26] was funded by both agency and industry.  
40

### 41 213 42 43 214 **Study Quality**

44  
45  
46 215 **Supplementary table 3** shows the study quality assessments by the NOS scale. There was no evidence  
47  
48 216 of serious risk of bias. Only NRHS cohort scored  $< 6$  on the NOS scale, which denotes lower quality  
49  
50  
51 217 [28].  
52

### 53 218 54 55 219 **Fruit intake on incident gout**

1  
2 220 **Figure 2** shows the relationship between food sources of fructose-containing sugars intake and  
3  
4 221 incident gout. There was significant interaction between the food sources ( $p=0.02$ ). When comparing  
5  
6  
7 222 the highest to the lowest fruit intake, no association was shown for fruit intake on incident gout (RR =  
8  
9 223 0.85, [95% CI 0.63 to 1.14]). There was evidence of significant interstudy heterogeneity ( $I^2 = 93\%$ ,  
10  
11  
12 224  $p<0.001$ ).

### 13 14 225 15 16 226 **Fruit juice intake on incident gout**

17  
18  
19 227 **Figure 2** shows the relationship between fruit juice intake and incident gout. When comparing the  
20  
21  
22 228 highest to lowest intake, an adverse association was shown for fruit juice intake on incident gout (RR  
23  
24 229 1.77, [95% CI 1.20 to 2.61]). There was no evidence of significant interstudy heterogeneity ( $I^2 = 0\%$   
25  
26 230 [95% CI 0% to 90%],  $p = 0.54$ ).

### 27 28 29 231 30 31 232 **SSB intake on incident gout**

32  
33  
34 233 **Figure 2** shows the relationship between SSB intake and incident gout. When comparing the highest  
35  
36 234 with the lowest intake, an adverse association was shown for SSB intake on incident gout (RR=2.08  
37  
38  
39 235 [95% CI 1.40 to 3.08]). There was no evidence of significant interstudy heterogeneity ( $I^2 = 0\%$ ,  $p =$   
40  
41 236 0.52).

### 42 43 237 44 45 46 238 **Additional analysis**

47  
48 239 Sensitivity analysis (the systematic removal of each study), publication bias and subgroup analyses  
49  
50  
51 240 could not be performed due to the small number of studies included in each analysis ( $n=2$ ).

### 52 53 241 54 55 56 242 **Dose-response analysis**

1  
2 243 A random-effect GLST model showed a significant dose-response relationship between fruit juice  
3  
4 244 intake and incident gout per serving/week (RR = 1.03, 95% CI 1.02 to 1.05,  $p < 0.001$ ) (**supplementary**  
5  
6  
7 245 **figure 1**), and for SSB intake (RR = 1.04, 95% CI 1.02 to 1.07,  $p < 0.001$ ) (**supplementary figure 2**). Fruit  
8  
9 246 juice intake showed a significant departure from linearity ( $p = 0.038$ ), and visual inspection of the  
10  
11  
12 247 graph (**supplementary figure 1**) indicated a plateau for risk increase after  $\geq 5$  servings per day. There  
13  
14 248 was no evidence for departure from linear dose response gradient or dose thresholds for SSB intake  
15  
16  
17 249 while using the restricted cubic spline model ( $p = 1.29$ ) (**supplementary figure 2**). Dose-response  
18  
19 250 modeling was not conducted for fruit intake due to lack of data.  
20  
21  
22 251

## 24 252 **GRADE assessment**

25  
26 253 **Table 2** shows the GRADE assessment of individual food sources of fructose-containing sugars. The  
27  
28  
29 254 quality of evidence of an adverse association from both fruit and fruit juice was rated as very low,  
30  
31 255 with downgrades to the lowest level for indirectness for fruit intake, and for inconsistency,  
32  
33  
34 256 indirectness and imprecision for fruit juice intake. The quality of evidence of an adverse association  
35  
36 257 of SSB intake with incident gout was rated as moderate, with a downgrade of one level for  
37  
38  
39 258 indirectness but upgrade of two levels for a large magnitude effect and significant dose-response  
40  
41 259 association.  
42  
43  
44 260

## 46 261 **DISCUSSION**

47  
48 262 We conducted a systematic review and meta-analysis of studies investigating the relation of  
49  
50  
51 263 important food sources of fructose-containing sugars with incident gout. We identified three  
52  
53 264 prospective cohort studies [26-28] comprising of 154,289 participants and 1,761 cases of incident  
54  
55  
56 265 gout. The pooled analyses revealed that there was moderate quality evidence that SSB intake was  
57  
58  
59  
60

1  
2 266 associated with 208% increase in risk of incident gout when comparing the highest with the lowest  
3  
4 267 intake. Similarly, there was low quality evidence that fruit juice intake was associated with a 77%  
5  
6  
7 268 increase in risk of incident gout, but fruit intake did not show any significant association with incident  
8  
9 269 gout (low quality evidence). There was no data available of other important food sources of fructose-  
10  
11  
12 270 containing sugars.

14 271

### 16 17 272 **Findings in the context of the literature**

18  
19 273 Our results are consistent with previous research which indicate that intake of certain food sources of  
20  
21  
22 274 fructose-containing sugars are associated with the risk of gout. Our previous systematic review and  
23  
24 275 meta-analysis of prospective cohort studies that assessed fructose intake, found a harmful  
25  
26 276 relationship between fructose consumption and gout [6]. While that study indicated that fructose  
27  
28  
29 277 moiety might possibly drive the association with gout, all the fructose data was derived from SSB  
30  
31 278 intake. Another systematic review of the literature identified numerous dietary factors associated  
32  
33  
34 279 with the risk of gout including meat, alcohol, seafood and SSBs, but also that lower risk was associated  
35  
36 280 with the intake of dairy, folate and coffee [3].

39 281

40  
41 282 SSBs are a major source of fructose-containing added sugars in the western diet comprising around  
42  
43  
44 283 30% of intake of added sugars in the USA [30] and around 24% in Canada [31]. Excess intake of  
45  
46 284 fructose can increase uric acid through an unregulated phosphofructose kinase pathway that uses  
47  
48 285 substantial amounts of ATP [32] to convert fructose into fructose-1-phosphate in the liver [33].

49  
50  
51 286 Mechanistically, net ATP degradation leads to accumulation of AMP, which is subsequently degraded  
52  
53 287 to uric acid. Additionally, fructose can increase de novo purine synthesis, which further produces uric  
54  
55  
56 288 acid [1]. This increase in uric acid can lead to the development of gout. Since we were unable to



1  
2 289 investigate the relationship between food sources of fructose-containing sugars and hyperuricemia,  
3  
4 290 we cannot validate this mechanism. It is possible, that fructose increases the risk of gout  
5  
6  
7 291 independently of serum uric acid levels. However, since the link between fructose and serum uric acid  
8  
9 292 [34-37], and the link between serum uric acid and the development of gout have been independently  
10  
11 293 established [1], it is unlikely that fructose increases the risk of gout without using uric acid as an  
12  
13  
14 294 intermediate.

15  
16 295  
17  
18  
19 296 We identified adverse association of fruit juices intake with incident gout. The two studies that  
20  
21 297 contributed to this result [26, 27] were both performed in two Harvard cohorts which do not  
22  
23  
24 298 differentiate between fruit drinks and pure fruit juice, the former being largely similar to SSBs i.e.  
25  
26 299 mainly sugar and water. This is supported by studies investigating pure fruit juice and fruit drinks  
27  
28  
29 300 which have shown divergent response for cardiometabolic disease [38, 39].  
30

31 301  
32  
33  
34 302 We did not see any association between fruit intake and incident gout but the effect estimates in the  
35  
36 303 two studies were in opposite direction. The NRHS [28] cohort showed a 51% reduction in risk of gout  
37  
38  
39 304 when with high intake of fruit whereas the HPFS [26] cohort showed a 63% increased risk — both  
40  
41 305 studies were performed in men. These discordant results highlight the differences in the studies.  
42  
43 306 NHPS cohort [26] only measured oranges and apples, fruit high in fructose, while NRHS [28] cohort  
44  
45  
46 307 assessed all fruit and its increasing intake, as the authors admit, might represent a healthier dietary  
47  
48 308 intake. It is possible that higher intake of fruits in NRHS might be associated with high intake of dairy  
49  
50  
51 309 or coffee, which have been associated with lowering the risk of gout [3] and not measured in NRHS.  
52  
53 310 Furthermore, case-control and cross-sectional studies have shown a protective effect of total fruit  
54  
55  
56 311 intake with gout albeit in Asian populations [40, 41], their relevance to the included studies,  
57  
58  
59  
60

1  
2 312 conducted in a largely Caucasian population, might be limited. The harmful association for oranges,  
3  
4 313 which are rich in vitamin C, in HPFS [26] cohort is at odds with its own result in another paper, in  
5  
6  
7 314 which the authors demonstrated a protective association of vitamin C intake with gout [42]. Fruits are  
8  
9 315 rich in fructose; however, fruit intake has consistently shown a benefit for cardiometabolic risk  
10  
11  
12 316 factors, cardiometabolic diseases and all cause-mortality [43-49] even though the fructose in fruit can  
13  
14 317 increase uric acid levels. More data might clarify this association.  
15

16  
17 318  
18  
19 319 We could not find any prospective studies looking at the association of food sources of fructose-  
20  
21  
22 320 containing sugars and hyperuricemia even though hyperuricemia is the most important risk factor for  
23  
24 321 gout [3, 50]. Hyperuricemia is also a risk factor for hypertension , metabolic syndrome, diabetes , and  
25  
26 322 CVD [51]. Several cross-sectional analyses have investigated the link between SSB consumption and  
27  
28  
29 323 serum uric acid levels, showing a positive relationship [34-37]. In contrast, the analysis of the National  
30  
31 324 Health and Nutrition Examination Survey (NHANES) showed no link between dietary fructose and risk  
32  
33  
34 325 of hyperuricemia, indicating that perhaps different food sources of fructose-containing sugars may  
35  
36 326 have different effects on serum uric acid. This point is reinforced by another analysis of NHANES data  
37  
38  
39 327 that showed a relationship of SSB intake with higher serum uric acid concentration, but not with fruit  
40  
41 328 juice [52]. Future studies investigating food sources of sugars and risk of hyperuricemia may help to  
42  
43  
44 329 elucidate some of the above inconsistent findings.  
45

46 330  
47  
48 331 We were not been able to find prospective cohort studies investigating the association of other food  
49  
50  
51 332 sources of fructose-containing sugars and the risk of gout. However, cross-sectional studies suggest  
52  
53 333 that cereal and yogurt may be associated with lower serum uric acid [53]. More research is needed to  
54  
55  
56 334 clarify the relationship between other food sources of fructose-containing sugars and the risk of gout.  
57  
58  
59

## Strengths and limitations

Our analysis has many strengths. First, we employed a comprehensive systematic search across major databases and the quantitative synthesis of results. Second, the studies we included had a substantial number of participants and cases of gout (154,289 participants and 1,761 gout cases) leading to increased precision. Additionally, the median follow-up duration was greater than 10 years, which allowed for enough time from exposure for the development of disease. Another strength is the use of validated measures of intake like food frequency questionnaires. The two Harvard cohorts [26, 27] administered FFQ multiple times, and validated them on a subsample, allowing for more accurate and robust long-term intakes compared to the NRHS [28] cohort, which only measured dietary intakes at baseline. In our analysis, we made use of GRADE to evaluate the quality and strength of our analysis and evaluate our confidence in the estimates.

There are some notable limitations to our systematic review and meta-analysis. First, while we included the most adjusted multivariable models for this analysis, there is always potential for unmeasured and residual confounding, since the studies included were observational in nature. This explains why GRADE starts at “low quality” for observational studies. Second, there was evidence of indirectness in some of the relationships. All studies were conducted in the USA, and two of the three studies were in health professionals. The two Harvard [26, 27] cohorts included only middle aged or older people who worked in health care and who were predominately white and the NRHS [28] cohort included only middle to old aged physically active men. Thus, the specific nature of the included studies’ population limits the generalizability of our results to other populations and geographical locations; however, the biological process of diet and gout are still likely to be similar to

1  
2 358 other populations. While, genome wide association studies have found numerous genes that increase  
3  
4 359 one's risk for gout [54] and some ethnic groups may be more susceptible than others [1], it is not  
5  
6  
7 360 known if the association of fructose intake with gout is modified by genes. Third, sources of  
8  
9 361 heterogeneity remained unexplained; with only three studies, we were unable to assess publication  
10  
11 362 bias or perform sensitivity or a priori subgroup analysis. Thus for these reasons, data pertaining to SSB  
13  
14 363 and fruit juice intake and incident gout received a GRADE of moderate and very low quality,  
15  
16  
17 364 respectively, indicating that further studies in this regard is likely to impact our certainty in the effect  
18  
19 365 estimate and may change the estimate for SSB and that our certainty in the estimate for fruit juice is  
20  
21  
22 366 very uncertain; therefore, caution should be used when interpreting these results. Similarly, for fruit,  
23  
24 367 which received a GRADE of very low, so we are very uncertain in these results and caution should be  
25  
26  
27 368 used in the interpretation of these results.

## 31 370 **Implications**

32  
33  
34 371 Dietary guidelines have shifted their focus from nutrients based recommendations to food and  
35  
36 372 dietary pattern-based recommendations [55], since it has been recognized that one does not eat  
37  
38  
39 373 nutrients in isolation, but as a part of food. Interactions between nutrients in food are complex and  
40  
41 374 important components of disease risk [55]. Our findings support this view in relation to food sources  
42  
43  
44 375 of fructose-containing sugars and their relationship with gout. Our findings also have implications for  
45  
46 376 recommendations for the prevention of gout. Conventional dietary recommendations for gout have  
47  
48  
49 377 focused on restriction of purine intake; however, low-purine diets are often high in carbohydrates,  
50  
51 378 including fructose-rich foods [56]. We have shown an adverse association between fruit juice and  
52  
53 379 SSBs, supporting the recommendations to limit their intakes. Since we did not have data relating to

1  
2 380 children, hyperuricemia or other food sources of fructose-containing sugars, we cannot extend our  
3  
4 381 conclusion to these groups of individuals or these foods.  
5  
6

## 7 382 8 9 383 **Conclusion**

10  
11 384 Our systematic review and meta-analysis of prospective cohort studies showed an adverse association  
12  
13  
14 385 between SSBs and fruit juice with risk of gout, while there was no association with fruit intake. The  
15  
16 386 strength of the evidence was moderate for SSB intake and very low for fruit juice and fruit intake, as  
17  
18  
19 387 assessed by GRADE. For SSBs, the true association is likely to be close to the estimate, but there is a  
20  
21 388 possibility that it is substantially different. For fruit juice and fruit intake, the true association are likely  
22  
23  
24 389 to be substantially different from the estimate and future research will very likely impact our  
25  
26 390 confidence in the effect estimates and likely to change them [57]. Our results are consistent with the  
27  
28  
29 391 literature that certain food sources of fructose-containing sugars especially SSBs are a risk factor for  
30  
31 392 the development of gout. We were unable to identify studies assessing food sources of fructose-  
32  
33  
34 393 containing sugars and hyperuricemia, indicating a gap in the literature. Given that incident gout is  
35  
36 394 rising [7, 58-63], and that gout and hyperuricemia are both associated with metabolic syndrome,  
37  
38  
39 395 myocardial infarction, diabetes and premature death [1, 2, 64], it is becoming increasingly important  
40  
41 396 to identify and understand risk factors for developing gout. It is imperative for additional prospective  
42  
43  
44 397 studies to assess the intake of various food sources of fructose-containing sugars and their  
45  
46 398 relationship with gout and hyperuricemia in diverse populations. This will help identify to what extent  
47  
48  
49 399 does our foods mediate the risk for hyperuricemia and gout and will further inform health care  
50  
51 400 professionals, policymakers, and aid in the development of improved dietary guidelines for the  
52  
53 401 prevention and management of gout and hyperuricemia.  
54  
55  
56 402

1  
2 403 **Funding Statement**

3  
4 404 This work was funded by the Canadian Institutes of Health Research (funding reference number,  
5  
6  
7 405 129920). The Diet, Digestive tract, and Disease (3-D) Centre, funded through the Canada Foundation  
8  
9 406 for Innovation (CFI) and the Ministry of Research and Innovation's Ontario Research Fund (ORF),  
10  
11  
12 407 provided the infrastructure for the conduct of this project. **JL Sievenpiper** was funded by a PSI  
13  
14 408 Graham Farquharson Knowledge Translation Fellowship, Canadian Diabetes Association (CDA)  
15  
16 409 Clinician Scientist award, CIHR INMD/CNS New Investigator Partnership Prize, and Banting & Best  
17  
18  
19 410 Diabetes Centre Sun Life Financial New Investigator Award. None of the sponsors had a role in any  
20  
21  
22 411 aspect of the present study, including design and conduct of the study; collection, management,  
23  
24 412 analysis, and interpretation of the data; and preparation, review, approval of the manuscript or  
25  
26 413 decision to publish.

27  
28  
29 414  
30  
31 415 **Data Sharing**

32  
33  
34 416 There is no additional unpublished data available from the study.

35  
36 417  
37  
38 418 **Competing Interests**

39  
40  
41 419 **TA Khan** has received research support from the Canadian Institutes of Health Research (CIHR) and an  
42  
43 420 unrestricted travel donation from Bee Maid Honey Ltd. **RJ de Souza** has served as an external  
44  
45  
46 421 resource person to the World Health Organization (WHO) Nutrition Guidance Expert Advisory Group  
47  
48 422 (NUGAG) Subgroup on Diet and Health (guidelines for trans fats and saturated fats), and received  
49  
50  
51 423 remuneration from WHO for travel and accommodation. He also received compensation for contract  
52  
53 424 research conducted for the Institute of Nutrition, Metabolism, and Diabetes at the Canadian Institutes  
54  
55  
56 425 of Health Research (CIHR), Health Canada and WHO. He has received research grants from the  
57  
58  
59

1  
2 426 Canadian Foundation for Dietetic Research and CIHR, and lecture fees from McMaster Children's  
3  
4 427 Hospital. **TMS Wolever** and his wife are part owners and employees of Glycemic Index Laboratories.  
5  
6  
7 428 **CWC Kendall** has received research support from the Advanced Foods and Materials Network,  
8  
9 429 Agricultural Bioproducts Innovation Program through the Pulse Research Network, Agriculture and  
10  
11 430 Agri-Food Canada, Almond Board of California, Barilla, Calorie Control Council, CIHR, Canola Council of  
12  
13  
14 431 Canada, The International Tree Nut Council Nutrition Research & Education Foundation, Kellogg,  
15  
16 432 Loblaw Companies Ltd., Pulse Canada, Saskatchewan Pulse Growers and Unilever. He has received  
17  
18  
19 433 consultant fees from American Pistachio Growers; speaker fees from American Peanut Council, Tate &  
20  
21 434 Lyle and The WhiteWave Foods Company; and travel funding from Sabra Dipping Company, Tate &  
22  
23  
24 435 Lyle, International Tree Nut Council Research & Education Foundation, California Walnut Commission,  
25  
26 436 Sun-Maid, The Peanut Institute, General Mills, Oldways Foundation and International Nut and Dried  
27  
28  
29 437 Fruit Council Foundation. He is on the Clinical Practice Guidelines Expert Committee for Nutrition  
30  
31 438 Therapy of the European Association for the Study of Diabetes (EASD). He is a member of the  
32  
33  
34 439 International Carbohydrate Quality Consortium (ICQC), Secretary of the Diabetes and Nutrition Study  
35  
36 440 Group (DNSG) of the EASD, and a Director of the Toronto 3D Knowledge Synthesis and Clinical Trials  
37  
38  
39 441 foundation. **JL Sievenpiper** has received research support from the CIHR, Canadian Diabetes  
40  
41 442 Association (CDA), PSI Foundation, Banting and Best Diabetes Centre (BBDC), Canadian Nutrition  
42  
43  
44 443 Society (CNS), American Society for Nutrition (ASN), Calorie Control Council, INC International Nut and  
45  
46 444 Dried Fruit Council Foundation, National Dried Fruit Trade Association, The Tate and Lyle Nutritional  
47  
48 445 Research Fund at the University of Toronto, and The Glycemic Control and Cardiovascular Disease in  
49  
50  
51 446 Type 2 Diabetes Fund at the University of Toronto (a fund established by the Alberta Pulse Growers).  
52  
53 447 He has received speaker fees and/or honoraria from the CDA, CNS, Dr. Pepper Snapple Group, Dairy  
54  
55  
56 448 Farmers of Canada, Nutrition Foundation of Italy (NFI), C3 Collaborating for Health, Sprim Brasil,  
57  
58  
59  
60

1  
2 449 WhiteWave Foods, Rippe Lifestyle, mdBriefcase, Alberta Milk, FoodMinds LLC, Memac Ogilvy &  
3  
4 450 Mather LLC, PepsiCo, The Ginger Network LLC, International Sweeteners Association, and Pulse  
5  
6  
7 451 Canada. He has ad hoc consulting arrangements with Winston & Strawn LLP, Perkins Coie LLP, and  
8  
9 452 Tate & Lyle. He is a member of the European Fruit Juice Association Scientific Expert Panel. He is on  
10  
11  
12 453 the Clinical Practice Guidelines Expert Committees of the CDA, European Association for the study of  
13  
14 454 Diabetes (EASD), and Canadian Cardiovascular Society (CCS), as well as an expert writing panel of the  
15  
16  
17 455 ASN. He serves as an unpaid scientific advisor for the Food, Nutrition, and Safety Program (FNSP) and  
18  
19 456 the Technical Committee on Carbohydrates of the International Life Science Institute (ILSI) North  
20  
21  
22 457 America. He is a member of the International Carbohydrate Quality Consortium (ICQC), Executive  
23  
24 458 Board Member of the Diabetes and Nutrition Study Group (DNSG) of the EASD, a Director of the  
25  
26  
27 459 Toronto 3D Knowledge Synthesis and Clinical Trials foundation. His wife is an employee of Unilever  
28  
29 460 Canada. No competing interests were declared by **Q Liu, S Ayoub-Charette, F Au-Yeung, S Blanco**  
30  
31 461 **Mejia, LA Leiter**. There are no patents, products in development or marketed products to declare.  
32  
33

34 462

### 36 463 **Authors' contributions**

37  
38 464 All authors had full access to all of the data (including statistical reports and tables) in this study and  
39  
40 465 take full responsibility for the integrity of the data and the accuracy of the data analysis.

41  
42 466 **Conception and design:** J.L. Sievenpiper.

43 467 **Analysis and interpretation of the data:** Q. Liu, S. Ayoub-Charette, T.A.Khan, F. Au-Yeung, S. Blanco  
44  
45 468 Mejia, R.J. de Souza, T.M.S. Wolever, L.A. Leiter, C.W.C. Kendall, J.L. Sievenpiper.

46  
47 469 **Drafting of the article:** Q. Liu, T.A. Khan, J.L. Sievenpiper.

48  
49 470 **Critical revision of the article for important intellectual content:** Q. Liu, S. Ayoub-Charette, T.A. Khan,  
50  
51 471 F. Au-Yeung, S. Blanco Mejia, R.J. de Souza, T.M.S. Wolever, L.A. Leiter, C.W.C. Kendall, J.L.  
52  
53 472 Sievenpiper.

54 473 **Final approval of the article:** Q. Liu, S. Ayoub-Charette, T.A. Khan, F. Au-Yeung, S. Blanco Mejia, R.J. de  
55  
56 474 Souza, T.M.S. Wolever, L.A. Leiter, C.W.C. Kendall, J.L. Sievenpiper.

57

58

59

60



1  
2 475 **Statistical expertise:** T.A. Khan, R.J. de Souza

3  
4 476 **Obtaining of funding:** J.L. Sievenpiper.

5  
6 477 **Administrative, technical, or logistic support:** S. Blanco Mejia

7  
8 478 **Collection and assembly of data:** Q. Liu, S. Ayoub-Charette, F. Au-Yeung

9  
10 479 **Guarantor:** J.L. Sievenpiper

11 480  
12 481 **REFERENCES**

- 13  
14 482 1. Choi, H.K.M., D. B. Reginato, A. M. American College of, Physicians American Physiological,  
15 483 Society, *Pathogenesis of gout*. Ann Intern Med, 2005. **143**(7): p. 499-516.
- 16 484 2. Oparil, S.Z., M. A. Calhoun, D. A., *Pathogenesis of hypertension*. Ann Intern Med, 2003. **139**(9):  
17 485 p. 761-76.
- 18 486 3. Singh, J.A., S.G. Reddy, and J. Kundukulam, *Risk factors for gout and prevention: a systematic*  
19 487 *review of the literature*. Curr Opin Rheumatol, 2011. **23**(2): p. 192-202.
- 20 488 4. Emmerson, B.T., *Effect of oral fructose on urate production*. Ann Rheum Dis, 1974. **33**(3): p.  
21 489 276-80.
- 22 490 5. Fox, I.H. and W.N. Kelley, *Studies on the mechanism of fructose-induced hyperuricemia in man*.  
23 491 *Metabolism*, 1972. **21**(8): p. 713-21.
- 24 492 6. Jamnik, J., et al., *Fructose intake and risk of gout and hyperuricemia: a systematic review and*  
25 493 *meta-analysis of prospective cohort studies*. BMJ Open, 2016. **6**(10): p. e013191.
- 26 494 7. Trifiro, G., et al., *Epidemiology of gout and hyperuricaemia in Italy during the years 2005-2009:*  
27 495 *a nationwide population-based study*. Ann Rheum Dis, 2013. **72**(5): p. 694-700.
- 28 496 8. *Cochrane Handbook for Systematic Reviews of Interventions*. The Cochrane Collaboration 2011  
29 497 March 2011 [cited 2016 November 4th]; Available from: [www.handbook.cochrane.org](http://www.handbook.cochrane.org).
- 30 498 9. Stroup, D.F., et al., *Meta-analysis of observational studies in epidemiology: a proposal for*  
31 499 *reporting*. *Meta-analysis Of Observational Studies in Epidemiology (MOOSE) group*. JAMA,  
32 500 2000. **283**(15): p. 2008-12.
- 33 501 10. Moher, D., et al., *Reprint--preferred reporting items for systematic reviews and meta-analyses:*  
34 502 *the PRISMA statement*. Phys Ther, 2009. **89**(9): p. 873-80.
- 35 503 11. Wells, G.A., et al. *The Newcastle-Ottawa Scale (NOS) for assessing the quality of*  
36 504 *nonrandomised studies in meta-analyses*. 2000 [cited 2016 November 4]; Available from:  
37 505 [http://www.ohri.ca/programs/clinical\\_epidemiology/oxford.asp](http://www.ohri.ca/programs/clinical_epidemiology/oxford.asp).
- 38 506 12. Orsini, N., R. Bellocco, and S. Greenland, *Generalized least squares for trend estimation of*  
39 507 *summarized dose-response data*. Stata Journal, 2006. **6**(1): p. 40.
- 40 508 13. Guyatt, G., et al., *GRADE guidelines: 1. Introduction-GRADE evidence profiles and summary of*  
41 509 *findings tables*. J Clin Epidemiol, 2011. **64**(4): p. 383-94.
- 42 510 14. Guyatt, G.H., et al., *GRADE guidelines: 2. Framing the question and deciding on important*  
43 511 *outcomes*. J Clin Epidemiol, 2011. **64**(4): p. 395-400.
- 44 512 15. Balshem, H., et al., *GRADE guidelines: 3. Rating the quality of evidence*. J Clin Epidemiol, 2011.  
45 513 **64**(4): p. 401-6.
- 46 514 16. Guyatt, G.H., et al., *GRADE guidelines: 4. Rating the quality of evidence--study limitations (risk*  
47 515 *of bias)*. J Clin Epidemiol, 2011. **64**(4): p. 407-15.
- 48 516 17. Guyatt, G.H., et al., *GRADE guidelines: 5. Rating the quality of evidence--publication bias*. J Clin  
49 517 *Epidemiol*, 2011. **64**(12): p. 1277-82.

- 1  
2 518 18. Guyatt, G.H., et al., *GRADE guidelines 6. Rating the quality of evidence--imprecision*. J Clin  
3 519 Epidemiol, 2011. **64**(12): p. 1283-93.  
4 520 19. Guyatt, G.H., et al., *GRADE guidelines: 7. Rating the quality of evidence--inconsistency*. J Clin  
5 521 Epidemiol, 2011. **64**(12): p. 1294-302.  
7 522 20. Guyatt, G.H., et al., *GRADE guidelines: 8. Rating the quality of evidence--indirectness*. J Clin  
8 523 Epidemiol, 2011. **64**(12): p. 1303-10.  
9 524 21. Guyatt, G.H., et al., *GRADE guidelines: 9. Rating up the quality of evidence*. J Clin Epidemiol,  
10 525 2011. **64**(12): p. 1311-6.  
12 526 22. Brunetti, M., et al., *GRADE guidelines: 10. Considering resource use and rating the quality of*  
13 527 *economic evidence*. J Clin Epidemiol, 2013. **66**(2): p. 140-50.  
14 528 23. Guyatt, G., et al., *GRADE guidelines: 11. Making an overall rating of confidence in effect*  
15 529 *estimates for a single outcome and for all outcomes*. J Clin Epidemiol, 2013. **66**(2): p. 151-7.  
16 530 24. Guyatt, G.H., et al., *GRADE guidelines: 12. Preparing summary of findings tables-binary*  
17 531 *outcomes*. J Clin Epidemiol, 2013. **66**(2): p. 158-72.  
19 532 25. Guyatt, G.H., et al., *GRADE guidelines: 13. Preparing summary of findings tables and evidence*  
20 533 *profiles-continuous outcomes*. J Clin Epidemiol, 2013. **66**(2): p. 173-83.  
21 534 26. Choi, H.K. and G. Curhan, *Soft drinks, fructose consumption, and the risk of gout in men:*  
22 535 *prospective cohort study*. BMJ, 2008. **336**(7639): p. 309-12.  
24 536 27. Choi, H.K., W. Willett, and G. Curhan, *Fructose-rich beverages and risk of gout in women*.  
25 537 JAMA, 2010. **304**(20): p. 2270-8.  
26 538 28. Williams, P.T., *Effects of diet, physical activity and performance, and body weight on incident*  
27 539 *gout in ostensibly healthy, vigorously active men*. American Journal of Clinical Nutrition, 2008.  
28 540 **87**(5): p. 1480-7.  
30 541 29. Wallace, S.L., et al., *Preliminary criteria for the classification of the acute arthritis of primary*  
31 542 *gout*. Arthritis Rheum, 1977. **20**(3): p. 895-900.  
32 543 30. Vos, M.B., et al., *Dietary fructose consumption among US children and adults: the Third*  
33 544 *National Health and Nutrition Examination Survey*. Medscape J Med, 2008. **10**(7): p. 160.  
35 545 31. Brisbois, T.D., et al., *Estimated intakes and sources of total and added sugars in the Canadian*  
36 546 *diet*. Nutrients, 2014. **6**(5): p. 1899-912.  
37 547 32. Kanbay, M., et al., *Uric acid in metabolic syndrome: from an innocent bystander to a central*  
38 548 *player*. European journal of internal medicine, 2016. **29**: p. 3-8.  
40 549 33. Garrett, R., et al., *Biochemistry, First Canadian Edition*. 2013, Toronto ON: Nelsoneducation.  
41 550 34. Choi, J.W., et al., *Sugar-sweetened soft drinks, diet soft drinks, and serum uric acid level: the*  
42 551 *Third National Health and Nutrition Examination Survey*. Arthritis Rheum, 2008. **59**(1): p. 109-  
43 552 16.  
45 553 35. Zgaga, L., et al., *The association of dietary intake of purine-rich vegetables, sugar-sweetened*  
46 554 *beverages and dairy with plasma urate, in a cross-sectional study*. PLoS One, 2012. **7**(6): p.  
47 555 e38123.  
48 556 36. Bombardieri, A.S., et al., *Sugar-sweetened soda consumption, hyperuricemia, and kidney disease*.  
49 557 Kidney Int, 2010. **77**(7): p. 609-16.  
51 558 37. Meneses-Leon, J., et al., *Sweetened beverage consumption and the risk of hyperuricemia in*  
52 559 *Mexican adults: a cross-sectional study*. BMC Public Health, 2014. **14**: p. 445.  
53 560 38. Griep, L.M.O., et al., *Raw and processed fruit and vegetable consumption and 10-year coronary*  
54 561 *heart disease incidence in a population-based cohort study in the Netherlands*. PLoS One, 2010.  
55 562 **5**(10): p. e13609.  
56 562  
57  
58  
59  
60

- 1  
2 563 39. Imamura, F., et al., *Consumption of sugar sweetened beverages, artificially sweetened*  
3 564 *beverages, and fruit juice and incidence of type 2 diabetes: systematic review, meta-analysis,*  
4 565 *and estimation of population attributable fraction.* BMJ, 2015. **351**: p. h3576.
- 5 566 40. Lyu, L.-C., et al., *A case-control study of the association of diet and obesity with gout in Taiwan.*  
6 567 *The American journal of clinical nutrition*, 2003. **78**(4): p. 690-701.
- 7 568 41. Liu, L., et al., *Relationship between lifestyle choices and hyperuricemia in Chinese men and*  
8 569 *women.* Clinical rheumatology, 2013. **32**(2): p. 233-239.
- 9 570 42. Gao, X.C., G. Forman, J. P. Ascherio, A. Choi, H. K., *Vitamin C intake and serum uric acid*  
10 571 *concentration in men.* Journal of Rheumatology, 2008. **35**(9): p. 1853-8.
- 11 572 43. Jia, X., et al., *Consumption of citrus and cruciferous vegetables with incident type 2 diabetes*  
12 573 *mellitus based on a meta-analysis of prospective study.* Prim. Care Diabetes, 2016.
- 13 574 44. Du, H., et al., *Fresh Fruit Consumption and Major Cardiovascular Disease in China.* N. Engl. J.  
14 575 *Med.*, 2016. **374**(14): p. 1332-1343.
- 15 576 45. Li, B., et al., *Fruit and Vegetables Consumption and Risk of Hypertension: A Meta-Analysis.*  
16 577 *Journal of Clinical Hypertension*, 2016. **18**(5): p. 468-476.
- 17 578 46. Aune, D., et al., *Fruit and vegetable intake and the risk of cardiovascular disease, total cancer*  
18 579 *and all-cause mortality—a systematic review and dose-response meta-analysis of prospective*  
19 580 *studies.* International Journal of Epidemiology, 2016.
- 20 581 47. Li, M., et al., *Fruit and vegetable intake and risk of type 2 diabetes mellitus: meta-analysis of*  
21 582 *prospective cohort studies.* BMJ open, 2014. **4**(11): p. e005497.
- 22 583 48. Wang, X., et al., *Fruit and vegetable consumption and mortality from all causes, cardiovascular*  
23 584 *disease, and cancer: systematic review and dose-response meta-analysis of prospective cohort*  
24 585 *studies.* BMJ, 2014. **349**: p. g4490.
- 25 586 49. Wu, L., D. Sun, and Y. He, *Fruit and vegetables consumption and incident hypertension: dose-*  
26 587 *response meta-analysis of prospective cohort studies.* Journal of human hypertension, 2016.  
27 588 **30**(10): p. 573.
- 28 589 50. Saag, K.G. and H. Choi, *Epidemiology, risk factors, and lifestyle modifications for gout.* Arthritis  
29 590 *Res Ther*, 2006. **8 Suppl 1**: p. S2.
- 30 591 51. Choi, H.K., *A prescription for lifestyle change in patients with hyperuricemia and gout.* Curr  
31 592 *Opin Rheumatol*, 2010. **22**(2): p. 165-72.
- 32 593 52. Gao, X.Q., L. Qiao, N. Choi, H. K. Curhan, G. Tucker, K. L. Ascherio, A., *Intake of added sugar*  
33 594 *and sugar-sweetened drink and serum uric acid concentration in US men and women.*  
34 595 *Hypertension*, 2007. **50**(2): p. 306-312.
- 35 596 53. Zykova, S.N., et al., *Cross-sectional analysis of nutrition and serum uric acid in two Caucasian*  
36 597 *cohorts: the AusDiab Study and the Tromsø study.* 2015. **14**(1): p. 49.
- 37 598 54. Reginato, A.M., et al., *The genetics of hyperuricaemia and gout.* Nat Rev Rheumatol, 2012.  
38 599 **8**(10): p. 610-21.
- 39 600 55. Sievenpiper, J.L. and P.D. Dworatzek, *Food and dietary pattern-based recommendations: an*  
40 601 *emerging approach to clinical practice guidelines for nutrition therapy in diabetes.* Can J  
41 602 *Diabetes*, 2013. **37**(1): p. 51-7.
- 42 603 56. Peixoto, M.R., et al., *Diet and medication in the treatment of hyperuricemia in hypertensive*  
43 604 *patients.* Arq Bras Cardiol, 2001. **76**(6): p. 463-72.
- 44 605 57. Andrews, J., et al., *GRADE guidelines: 14. Going from evidence to recommendations: the*  
45 606 *significance and presentation of recommendations.* J Clin Epidemiol, 2013. **66**(7): p. 719-25.
- 46 607 58. Rai, S.K., et al., *Trends in Gout and Rheumatoid Arthritis Hospitalizations in Canada from 2000-*  
47 608 *2011.* Arthritis Care and Research, 2016.

- 1  
2 609 59. Arromdee, E., et al., *Epidemiology of gout: is incidence rising?* Journal of Rheumatology, 2002.  
3 610 **29**: p. 2403-2306.  
4 611 60. Zhu, Y., B.J. Pandya, and H.K. Choi, *Prevalence of gout and hyperuricemia in the US general*  
5 612 *population: the National Health and Nutrition Examination Survey 2007-2008*. Arthritis Rheum,  
6 613 2011. **63**(10): p. 3136-41.  
7 614 61. Wallace, K.L., et al., *Increasing prevalence of gout and hyperuricemia over 10 years among*  
8 615 *older adults in a managed care population*. J Rheumatol, 2004. **31**(8): p. 1582-7.  
9 616 62. Harris, C.M., D.C. Lloyd, and J. Lewis, *The prevalence and prophylaxis of gout in England*. J Clin  
10 617 Epidemiol, 1995. **48**(9): p. 1153-8.  
11 618 63. Klemp, P., et al., *Gout is on the increase in New Zealand*. Ann Rheum Dis, 1997. **56**(1): p. 22-6.  
12 619 64. Canada, S. *The 10 leading causes of death, 2011*. 2015 2015-11-27 [cited 2016 4th of  
13 620 November]; Available from: [http://www.statcan.gc.ca/pub/82-625-x/2014001/article/11896-](http://www.statcan.gc.ca/pub/82-625-x/2014001/article/11896-eng.htm)  
14 621 [eng.htm](http://www.statcan.gc.ca/pub/82-625-x/2014001/article/11896-eng.htm).  
15 622  
16 623  
17 624  
18 625  
19 626  
20 627  
21 628  
22 629  
23 630  
24 631  
25 632  
26 633  
27 634  
28 635  
29 636  
30 637  
31 638  
32 639  
33 640  
34 641  
35 642  
36 643  
37  
38  
39  
40  
41  
42  
43  
44  
45  
46  
47  
48  
49  
50  
51  
52  
53  
54  
55  
56  
57  
58  
59  
60

1  
2 644 **TABLES AND FIGURES**  
3

4 645  
5  
6 646 **Figure 1** Summary of evidence search and selection. Flow of the literature search for the effect of food  
7 647 sources of sugar intake on incident gout and hyperuricemia. Of the 309 studies initially identified, 294  
8 648 were excluded based on title and/or abstract. The remainder were read in full by two independent  
9 649 reviewers; after, 12 were further excluded. Included in this analysis were three prospective cohort  
10 650 studies.  
11  
12  
13  
14

15 651  
16  
17 652 **Figure 2** Relation between intake of fruit, fruit juice and SSB incident gout. Estimates from most-  
18 653 adjusted multivariate models accounting for food sources of fructose-containing sugars intake were  
19 654 used. The diamond represents the pooled effect estimate. Interstudy heterogeneity was tested using  
20 655 the Cochran Q statistic and quantified using the  $I^2$  statistic ( $I^2 \geq 50\%$  indicative of significant  
21 656 heterogeneity). All results are presented as RR with 95% CI. OJ = orange juice. Other = other fruit juices.  
22 657 \* The number of cases and participants are divided equally between the multiple entries of the study  
23 658 to ensure total count gives unique individuals. To overcome a unit-of-analysis error for studies  
24 659 appearing more than once in the same analysis, we readjusted the log-standard errors to participants  
25 660 equally among the multiple comparisons and.  
26  
27  
28  
29  
30  
31  
32

33 661  
34  
35 662  
36 663  
37  
38 664  
39 665  
40  
41 666  
42 667  
43  
44 668  
45  
46 669  
47 670  
48  
49 671  
50 672  
51  
52 673  
53 674  
54  
55 675  
56 676  
57  
58  
59  
60

**Table 1** Characteristics of prospective cohort studies investigating food sources of fructose-containing sugar intake and incident gout.

| Study, year (Reference)        | Cohort   | Country | Participants | Incident Cases | Age (mean years, range) | Follow-up (mean, range) | Dietary Assessment | Food source of fructose-containing sugars | Frequency of Administration | Quantiles | Exposure (servings/week, median, range) | Serving size | Outcome assessment | Funding Source*     |
|--------------------------------|----------|---------|--------------|----------------|-------------------------|-------------------------|--------------------|-------------------------------------------|-----------------------------|-----------|-----------------------------------------|--------------|--------------------|---------------------|
| Choi <i>et al.</i> , 2008 (26) | HPFS NHS | USA     | 46,393 (M)   | 755            | 52.5 (40-75)            | 12 years                | Validated SFFQ     | SSBs<br>Fruit Juice<br>Fruit              | 4 times                     | Quintiles | ¼ - ≥14                                 | Not reported | Record linkage     | Agency and Industry |
| Choi <i>et al.</i> , 2010 (27) | NHS      | USA     | 78,906 (F)   | 778            | 49 (30-55)              | 22 years                | Validated SFFQ     | SSBs<br>Fruit Juice                       | 4 times                     | Sextiles  | ¼ - ≥14                                 | Not reported | Self-reported      | Agency              |
| Williams, 2008 (28)            | NRHS     | USA     | 28,990 (M)   | 228            | 44.9                    | 7.7 years (5.9-9.6)     | Validated SFFQ     | Fruit                                     | 1 (baseline)                | Quartiles | ¼ - 2 (0 - ≥2)                          | Not reported | Self-reported      | Agency              |

Abbreviations: HPFS = Health Professionals Follow-Up Study; NHS = Nurses Health Study; NRHS =National Runner’s Health Study; M=males;

F=females; SFFQ = Semi quantitative Food-Frequency Questionnaire; SSBs = Sugar Sweetened Beverages.

\*Agency funding is that from government, university or not-for-profit health agency sources.

**Table 2** GRADE assessment of individual food source of fructose-containing sugars.

| Quality assessment                                                            |                       |                         |                                         |                                   |                        |                         |                                                                      | Study event rates (%) | Effect                 | Quality Importance                                                                                                                       |
|-------------------------------------------------------------------------------|-----------------------|-------------------------|-----------------------------------------|-----------------------------------|------------------------|-------------------------|----------------------------------------------------------------------|-----------------------|------------------------|------------------------------------------------------------------------------------------------------------------------------------------|
| No. of studies                                                                | Design                | Risk of bias            | Inconsistency                           | Indirectness                      | Imprecision            | Publication bias        | Other considerations                                                 |                       | Relative Risk (95% CI) |                                                                                                                                          |
| Sugar sweetened beverages intake on incident gout (follow-up median 17 years) |                       |                         |                                         |                                   |                        |                         |                                                                      |                       |                        |                                                                                                                                          |
| 2                                                                             | Observational studies | No serious risk of bias | No serious inconsistency                | Serious indirectness <sup>1</sup> | No serious imprecision | Undetected <sup>2</sup> | Large magnitude of effect <sup>3</sup><br>Dose-response <sup>4</sup> | 1533/125299 (1.22%)   | 2.08 [1.40, 3.07]      | ⊕⊕⊕○<br><b>Moderate</b> <sup>1,2,3,4</sup><br>Due to downgrade for indirectness and upgrade for large magnitude effect and dose-response |
| Fruit juice intake on incident gout (follow-up median 17 years)               |                       |                         |                                         |                                   |                        |                         |                                                                      |                       |                        |                                                                                                                                          |
| 2                                                                             | Observational studies | No serious risk of bias | No serious inconsistency                | Serious indirectness <sub>1</sub> | No serious imprecision | Undetected <sup>2</sup> | None                                                                 | 1533/125299 (1.22%)   | 1.73 [1.17, 2.57]      | ⊕○○○<br><b>Very low</b> <sup>1,2</sup><br>Due to downgrade for indirectness                                                              |
| Fruit intake on incident gout (follow-up median 9.87 years)                   |                       |                         |                                         |                                   |                        |                         |                                                                      |                       |                        |                                                                                                                                          |
| 2                                                                             | Observational studies | No serious risk of bias | Very serious inconsistency <sup>5</sup> | Serious indirectness <sub>1</sub> | Serious <sup>6</sup>   | Undetected <sup>2</sup> | None                                                                 | 983/75383 (1.3%)      | 0.89 [0.27, 2.87]      | ⊕○○○<br><b>Very low</b> <sup>1,2,5,6</sup><br>Due to downgrade for inconsistency, indirectness and imprecision                           |

<sup>1</sup>Downgrade for indirectness, as the study population is specific to a group of the population like professionals, nurses or runners.

<sup>2</sup>No downgrade for publication bias, as publication bias could not be assessed due to lack of power for assessing funnel plot asymmetry and small study effect (<10 cohort included in our meta-analysis).

<sup>3</sup>Upgrade for a large magnitude of effect (RR>2.0).

1  
2 694 <sup>4</sup>Upgrade for a dose response gradient, as the GLST dose-response analysis revealed a significant linear relationship between sugar  
3  
4 695 sweetened beverage intake and incident gout (P=0.0001).

5  
6 696 <sup>5</sup>Downgrade for very serious inconsistency, as the two studies included had opposite associations and there was evidence of substantial  
7  
8 697 inter-study heterogeneity ( $I^2=94%$ ,  $p<0.0001$ ). Due to the small number of studies included in the analysis, subgroup analysis was not  
9  
10 698 performed.

11 699 <sup>6</sup>Downgrade for serious imprecision, as the lower bound of the 95% CI (RR, 0.27) includes clinically important benefit (RR<0.9), while the  
12  
13 700 upper bound of the 95% CI (RR, 2.87) crosses the minimally important difference of 10% (RR>1.1).  
14  
15  
16  
17  
18  
19  
20  
21  
22  
23  
24  
25  
26  
27  
28  
29  
30  
31  
32  
33  
34  
35  
36  
37  
38  
39  
40  
41  
42  
43  
44  
45  
46  
47



Figure 1 Summary of evidence search and selection

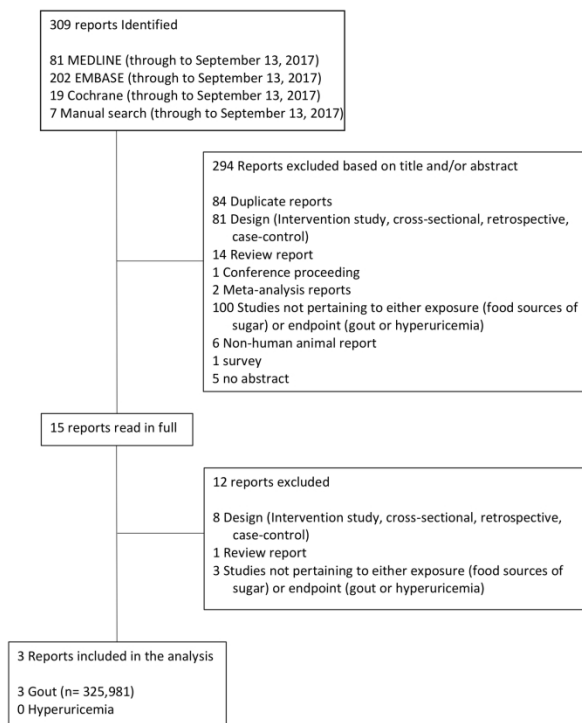

Figure 1. Summary of evidence search and selection

215x279mm (300 x 300 DPI)

Figure 2 Relation between intake of fruit, fruit juice and SSB incident gout.

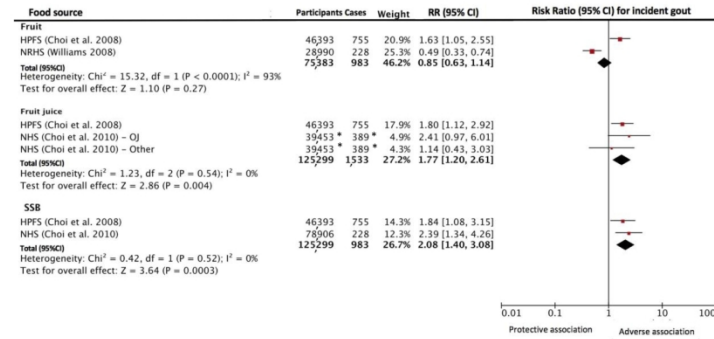

Figure 2. Relation between intake of fruit, fruit juice and SSB incident gout.

215x279mm (300 x 300 DPI)

## Supplementary material

### SUPPLEMENTARY TABLES

**Supplementary table 1** Search terms

**Supplementary table 2** Analysis of confounding variables among 3 studies of food sources of sugar intake and incident gout

**Supplementary table 3** Newcastle-Ottawa Scale (NOS) for assessing the quality of cohort studies

### SUPPLEMENTARY FIGURES

**Supplementary figure 1** Linear and non-linear dose-response relationship between fruit juice intake and incident gout per serving/week

**Supplementary figure 2** Linear and non-linear dose-response relationship between SSB intake and incident gout per serving/week

## Supplementary table 1. Search terms

### Database and search terms

#### MEDLINE

1. sugar\*.mp.
2. exp fructose/
3. fructose.mp.
4. HFCS.mp.
5. exp high fructose Corn Syrup/
6. sucrose.mp.
7. exp dietary Sucrose/
8. sugar sweetened beverage\*.mp.
9. ssb.mp.
10. soda.mp.
11. soft drink\*.mp.
12. exp carbonated beverages/
13. carbonated beverages.mp.
14. non alcoholic beverage\*.mp.
15. nonalcoholic beverage\*.mp.
16. exp energy drinks/
17. energy drink\*.mp.
18. smoothie\*.mp.
19. exp "fruit and vegetable juices"/
20. fruit.mp.
21. exp fruit/
22. exp honey/
23. y\*g\*rt.mp.
24. exp yogurt/
25. ice cream\*.mp.
26. icecream\*.mp.
27. exp ice cream/
28. exp edible grain/
29. cereal\*.mp.
30. dessert\*.mp.
31. sweets.mp.
32. confection\*.mp.
33. pastries.mp.
34. biscuit\*.mp.
35. cookie\*.mp.
36. cake\*.mp.
37. candy.mp.
38. candies\*.mp.
39. exp candy/
40. (chocolate adj2 milk).mp.
41. chocolate.mp
42. exp chocolate/
43. cacao.mp
44. exp cacao/
45. cohort.mp.
46. exp prospective study/
47. (prospective adj2 (cohort or study)).mp.
48. exp multivariate analysis/
49. exp follow up studies/
50. exp proportional hazards models/

#### EMBASE

1. sugar\*.mp.
2. exp sugar/
3. exp fructose/
4. fructose.mp.
5. HFCS.mp.
6. exp high fructose Corn Syrup/
7. sucrose.mp.
8. exp dietary Sucrose/
9. sugar sweetened beverage\*.mp.
10. SSB.mp.
11. soda.mp.
12. soft drink\*.mp.
13. exp soft drink/
14. exp carbonated beverages/
15. carbonated beverages.mp.
16. non alcoholic beverage\*.mp.
17. nonalcoholic beverage\*.mp.
18. exp energy drinks/
19. energy drink\*.mp.
20. smoothie\*.mp.
21. exp "fruit and vegetable juices"/
22. fruit.mp.
23. exp fruit/
24. exp honey/
25. y\*g\*rt.mp.
26. exp yoghurt/
27. ice cream\*.mp.
28. icecream\*.mp.
29. exp ice cream/
30. cereal\*.mp.
31. dessert\*.mp.
32. sweets.mp.
33. confection\*.mp.
34. exp bakery product/
35. pastries.mp.
36. biscuit\*.mp.
37. cookie\*.mp.
38. cake\*.mp.
39. candy.mp.
40. candies\*.mp.
41. chocolate.mp
42. exp chocolate/
43. cacao.mp
44. exp cacao/
45. (chocolate adj2 milk).mp.
46. cohort.mp.
47. exp prospective study/
48. (prospective adj2 (cohort or study)).mp.
49. exp multivariate analysis/
50. exp proportional hazards models/

#### Cochrane

1. sugar\*.mp.
2. exp fructose/
3. fructose.mp.
4. HFCS.mp.
5. exp Nutritive Sweeteners/
6. sucrose.mp.
7. exp dietary sucrose/
8. sugar sweetened beverage\*.mp.
9. ssb.mp.
10. soda.mp.
11. soft drink\*.mp.
12. exp carbonated beverages/
13. non alcoholic beverage\*.mp.
14. nonalcoholic beverage\*.mp.
15. exp energy drinks/
16. energy drink\*.mp.
17. smoothie\*.mp.
18. ((fruit or vegetable) and juice\*).mp.
19. fruit.mp.
20. exp fruit/
21. exp honey/
22. y\*g\*rt.mp.
23. exp yogurt/
24. ice cream\*.mp.
25. icecream\*.mp.
26. exp ice cream/
27. cereal\*.mp.
28. dessert\*.mp.
29. sweets.mp.
30. confection\*.mp.
31. pastries.mp.
32. biscuit\*.mp.
33. cookie\*.mp.
34. cake\*.mp.
35. candy.mp.
36. candies.mp.
37. exp candy/
38. (chocolate adj2 milk).mp.
39. cohort.mp.
40. exp Prospective Studies/
41. chocolate.mp
42. cacao.mp
43. exp cacao/
44. (prospective adj2 (cohort or study)).mp.
45. exp follow-up studies/
46. exp multivariate analysis/
47. exp proportional hazards models/
48. follow up study.mp.
49. (longitudinal adj2 study).mp.
50. gout/

1  
2  
3 51. follow-up study.mp. 51. follow-up study.mp. 51. gout\*.mp  
4 52. (longitudinal adj2 study).mp. 52. (longitudinal adj2 study).mp. 52. uric acid\*.mp  
5 53. gout/ 53. gout/ 53. hyperuricemia\*.mp  
6 54. gout\*.mp. 54. gout\*.mp. 54. hyperuricemia/  
7 55. uric acid\*.mp. 55. uric acid\*.mp. 55. hyperuricaemia\*.mp  
8 56. hyperuricemia\*.mp. 56. hyperuricemia\*.mp. 56. uric.mp  
9 57. hyperuricemia/ 57. hyperuricemia/ 57. or/1-43  
10 58. hyperuricaemia\*.mp. 58. hyperuricaemia\*.mp. 58. or/44-49  
11 59. uric.mp. 59. uric.mp. 59. or/50-56  
12 60. or/1-44 60. or/1-45 60. and/57-59  
13 61. or/45-52 61. or/46-52  
14 62. or/53-59 62. or/53-59  
15 63. and/60-62 63. and/60-62

| Database                     | Total |
|------------------------------|-------|
| MEDLINE: September 13, 2017  | 81    |
| EMBASE: September 13, 2017   | 202   |
| Cochrane: September 13, 2017 | 19    |
| Manual search                | 7     |
| Total                        | 309   |

For all databases, the original search was September 13, 2017.

**Supplementary table 2.** Analysis of confounding variables among 3 studies of food sources of sugar intake and incident gout

| Study                                                                                           | HPFS (Choi <i>et al.</i> , 2008) | NRHS (Williams, 2008) | NHS (Choi <i>et al.</i> , 2010) |
|-------------------------------------------------------------------------------------------------|----------------------------------|-----------------------|---------------------------------|
| Number of variables in fully adjusted model                                                     | 14                               | 6                     | 14                              |
| Number of multivariable models presented                                                        | 2                                | 1                     | 3                               |
| Timing of measurement of confounding variables                                                  | 2y                               | BL*                   | 2y                              |
| <b>Pre-specified primary confounding variable</b>                                               |                                  |                       |                                 |
| Age                                                                                             | ✓                                | ✓                     | ✓                               |
| <b>Pre-specified secondary confounding variables</b>                                            |                                  |                       |                                 |
| Marker of overweight/obesity (Body mass index, weight, waist circumference, waste to hip ratio) | ✓                                |                       | ✓                               |
| Sex                                                                                             | M §                              | M §                   | F ‡                             |
| History of gout/hyperuricemia                                                                   |                                  |                       |                                 |
| Diabetes                                                                                        |                                  |                       |                                 |
| Physical activity                                                                               |                                  |                       |                                 |
| Lipid medication/dyslipidemia                                                                   |                                  |                       |                                 |
| Animal protein intake                                                                           | ✓                                |                       | ✓                               |
| Hypertension or blood pressure medication including diuretics                                   | ✓                                |                       | ✓                               |
| <b>Other confounding variables</b>                                                              |                                  |                       |                                 |
| <b>Lifestyle factors</b>                                                                        |                                  |                       |                                 |
| Weekly intake of:                                                                               |                                  |                       |                                 |
| Alcohol                                                                                         | ✓                                | ✓                     | ✓                               |
| Seafood                                                                                         | ✓                                |                       | ✓                               |
| Purine from vegetables                                                                          | ✓                                |                       | ✓                               |
| Dairy food                                                                                      | ✓                                |                       | ✓                               |
| Vitamin C                                                                                       | ✓                                |                       | ✓                               |
| Coffee                                                                                          |                                  | ✓                     |                                 |
| Meat                                                                                            |                                  | ✓                     |                                 |
| Fish                                                                                            |                                  |                       | ✓∇                              |
| Diet soda                                                                                       | ✓∇                               |                       | ✓∇                              |
| Sugar-sweetened cola                                                                            | ✓∇                               |                       | ✓∇                              |
| Other soda                                                                                      | ✓∇                               |                       | ✓∇                              |
| Orange or apple juice                                                                           | ✓∇                               |                       | ✓∇                              |
| Other fruit juice                                                                               |                                  |                       | ✓∇                              |
| Orange or apple                                                                                 | ✓∇                               |                       |                                 |
| Total energy                                                                                    | ✓                                |                       | ✓                               |
| Weekly intake of aspirin                                                                        |                                  | ✓                     |                                 |
| <b>Medical history</b>                                                                          |                                  |                       |                                 |
| History of Hypertension                                                                         | ✓                                | ✓                     | ✓                               |
| History of chronic Renal failure                                                                | ✓                                |                       |                                 |
| Menopause status                                                                                |                                  |                       | ✓                               |
| Use of hormonal therapy                                                                         |                                  |                       | ✓                               |

HPFS=Health Professionals Follow-Up Study, NHS=Nurses Health Study

\*Denotes confounders measured only at baseline years.

† Indicates confounders measured every 2 years.

‡ Indicates the study includes only female subjects

§ Indicates the study includes only male subjects

∇ Indicates the confounder was present in some, but not all, models.

**Supplementary table 3.** Newcastle-Ottawa Scale (NOS) for assessing the quality of cohort studies

| Study                     | Selection* | Outcome† | Comparability‡ | total§ |
|---------------------------|------------|----------|----------------|--------|
| Choi <i>et al.</i> , 2008 | 2          | 3        | 1              | 6      |
| Williams, 2008            | 2          | 2        | 1              | 5      |
| Choi <i>et al.</i> , 2010 | 2          | 3        | 1              | 6      |

\*Maximum 4 points awarded for cohort representativeness, selection of non-exposed cohort, exposure assessment and demonstration outcome not present at baseline.

†Maximum 3 points awarded for follow-up length, adequacy of follow-up and outcome assessment.

‡Maximum 2 points awarded for controlling for the pre-specified primary confounding variable (age) and >6 of the secondary confounding variables (sex, body mass index, history of gout or hyperuricemia, diabetes, alcohol, physical activity, lipid medication/dyslipidemia, animal protein intake, hypertension or blood pressure medication including diuretics).

§A maximum of 9 points could be awarded.

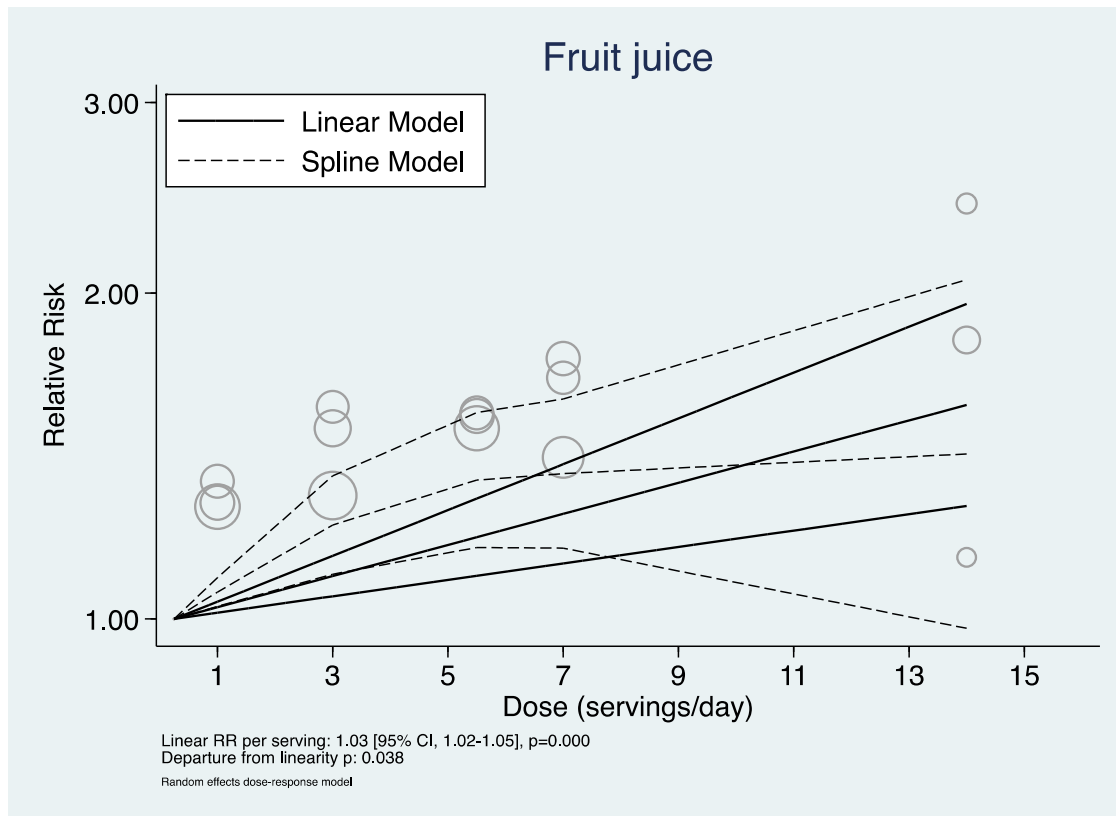

28 **Supplementary figure 1.** Linear and non-linear dose-response relationship between fruit juice intake  
29 and incident gout per serving/week. Linear dose response data (solid lines) were modeled using the  
30 generalized least squares trend estimation models (GLST). Non-linear dose response data (dashed lines)  
31 were modeled with fixed-effects restricted cubic spline models with 3 knots. 95% confidence interval  
32 for the fitted trend are shown above and below the solid line. Each study was centered to its own  
33 baseline reference dose when estimating increasing dose risk.  
34



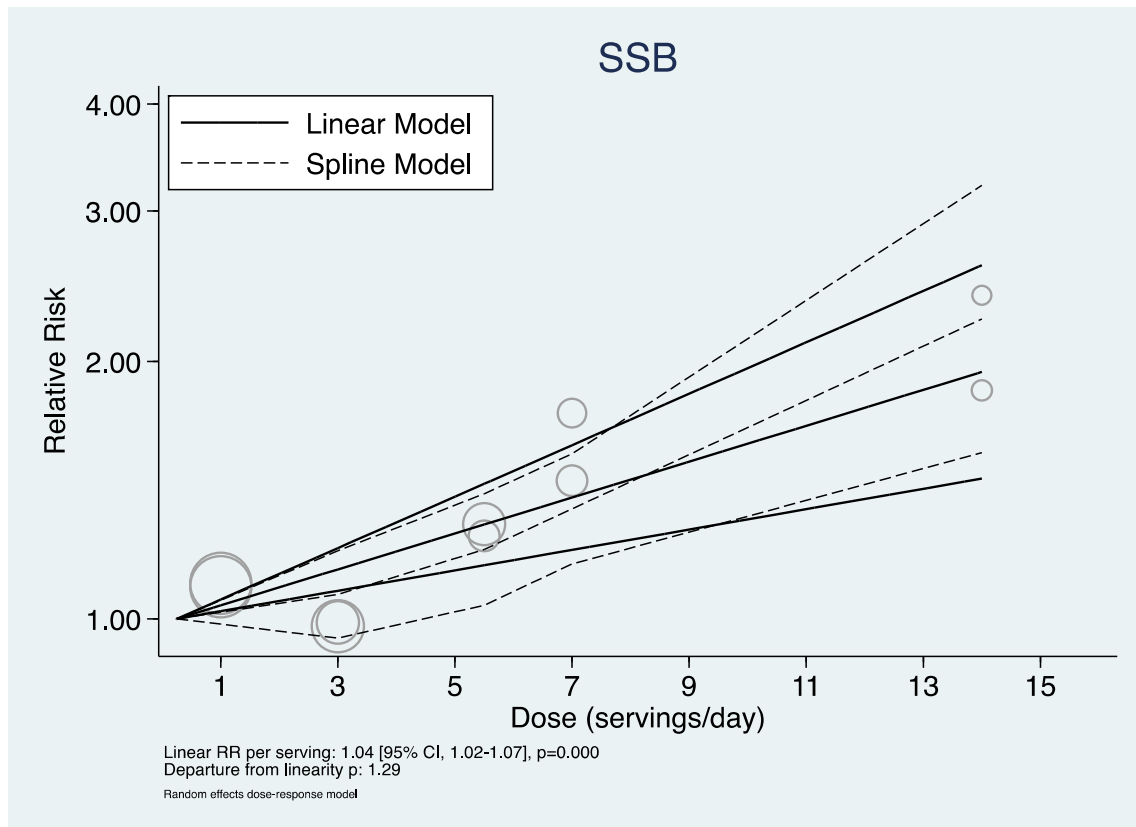

28 **Supplementary figure 2.** Linear and non-linear dose-response relationship between SSB intake and  
 29 incident gout per serving/week. Linear dose response data (solid lines) were modeled using the  
 30 generalized least squares trend estimation models (GLST). Non-linear dose response data (dashed lines)  
 31 were modeled with fixed-effects restricted cubic spline models with 3 knots. 95% confidence interval  
 32 for the fitted trend are shown above and below the solid line. Each study was centered to its own  
 33 baseline reference dose when estimating increasing dose risk.  
 34

## MOOSE Checklist for Meta-analyses of Observational Studies

| Item No                                     | Recommendation                                                                                                                                                                                                                                                               | Reported on Page No      |
|---------------------------------------------|------------------------------------------------------------------------------------------------------------------------------------------------------------------------------------------------------------------------------------------------------------------------------|--------------------------|
| Reporting of background should include      |                                                                                                                                                                                                                                                                              |                          |
| 1                                           | Problem definition                                                                                                                                                                                                                                                           | 4                        |
| 2                                           | Hypothesis statement                                                                                                                                                                                                                                                         | -                        |
| 3                                           | Description of study outcome(s)                                                                                                                                                                                                                                              | 4, 5                     |
| 4                                           | Type of exposure or intervention used                                                                                                                                                                                                                                        | 5                        |
| 5                                           | Type of study designs used                                                                                                                                                                                                                                                   | 5                        |
| 6                                           | Study population                                                                                                                                                                                                                                                             | 5                        |
| Reporting of search strategy should include |                                                                                                                                                                                                                                                                              |                          |
| 7                                           | Qualifications of searchers (eg, librarians and investigators)                                                                                                                                                                                                               | 5, Title page            |
| 8                                           | Search strategy, including time period included in the synthesis and key words                                                                                                                                                                                               | 5, supplementary table 1 |
| 9                                           | Effort to include all available studies, including contact with authors                                                                                                                                                                                                      | 5                        |
| 10                                          | Databases and registries searched                                                                                                                                                                                                                                            | 5                        |
| 11                                          | Search software used, name and version, including special features used (eg, explosion)                                                                                                                                                                                      | 6                        |
| 12                                          | Use of hand searching (eg, reference lists of obtained articles)                                                                                                                                                                                                             | 5                        |
| 13                                          | List of citations located and those excluded, including justification                                                                                                                                                                                                        | 7, 8, Fig 1              |
| 14                                          | Method of addressing articles published in languages other than English                                                                                                                                                                                                      | -                        |
| 15                                          | Method of handling abstracts and unpublished studies                                                                                                                                                                                                                         | 5                        |
| 16                                          | Description of any contact with authors                                                                                                                                                                                                                                      | -                        |
| Reporting of methods should include         |                                                                                                                                                                                                                                                                              |                          |
| 17                                          | Description of relevance or appropriateness of studies assembled for assessing the hypothesis to be tested                                                                                                                                                                   | 7-9                      |
| 18                                          | Rationale for the selection and coding of data (eg, sound clinical principles or convenience)                                                                                                                                                                                | 5                        |
| 19                                          | Documentation of how data were classified and coded (eg, multiple raters, blinding and interrater reliability)                                                                                                                                                               | 5                        |
| 20                                          | Assessment of confounding (eg, comparability of cases and controls in studies where appropriate)                                                                                                                                                                             | 9, supplementary table 2 |
| 21                                          | Assessment of study quality, including blinding of quality assessors, stratification or regression on possible predictors of study results                                                                                                                                   | 9, supplementary table 3 |
| 22                                          | Assessment of heterogeneity                                                                                                                                                                                                                                                  | 6, 7                     |
| 23                                          | Description of statistical methods (eg, complete description of fixed or random effects models, justification of whether the chosen models account for predictors of study results, dose-response models, or cumulative meta-analysis) in sufficient detail to be replicated | 6, 7                     |
| 24                                          | Provision of appropriate tables and graphics                                                                                                                                                                                                                                 | Tables 1, 2, Figs 1, 2   |
| Reporting of results should include         |                                                                                                                                                                                                                                                                              |                          |
| 25                                          | Graphic summarizing individual study estimates and overall estimate                                                                                                                                                                                                          | Figs 2                   |
| 26                                          | Table giving descriptive information for each study included                                                                                                                                                                                                                 | Table 1                  |
| 27                                          | Results of sensitivity testing (eg, subgroup analysis)                                                                                                                                                                                                                       | -                        |

|    |                                                   |             |
|----|---------------------------------------------------|-------------|
| 28 | Indication of statistical uncertainty of findings | 11, table 2 |
|----|---------------------------------------------------|-------------|

| Item No                                 | Recommendation                                                                                                            | Reported on Page No |
|-----------------------------------------|---------------------------------------------------------------------------------------------------------------------------|---------------------|
| Reporting of discussion should include  |                                                                                                                           |                     |
| 29                                      | Quantitative assessment of bias (eg, publication bias)                                                                    | 10, 16              |
| 30                                      | Justification for exclusion (eg, exclusion of non-English language citations)                                             | 5                   |
| 31                                      | Assessment of quality of included studies                                                                                 | 16                  |
| Reporting of conclusions should include |                                                                                                                           |                     |
| 32                                      | Consideration of alternative explanations for observed results                                                            | 11-17               |
| 33                                      | Generalization of the conclusions (ie, appropriate for the data presented and within the domain of the literature review) | 16, 17              |
| 34                                      | Guidelines for future research                                                                                            | 16, 17              |
| 35                                      | Disclosure of funding source                                                                                              | 17, 18              |

From: Stroup DF, Berlin JA, Morton SC, et al, for the Meta-analysis Of Observational Studies in Epidemiology (MOOSE) Group. Meta-analysis of Observational Studies in Epidemiology. A Proposal for Reporting. *JAMA*. 2000;283(15):2008-2012. doi: 10.1001/jama.283.15.2008.

# BMJ Open

## Important food sources of fructose-containing sugars and incident gout: A systematic review and meta-analysis of prospective cohort studies

|                                 |                                                                                                                                                                                                                                                                                                                                                                                                                                                                                                                                                                                                                                                                                                                                                                                                                                                                                                                                                                                                                                                                                                                                                                                                                                                                                                                                                                                                                                                                                                                                                                                                                                                                                                                                                                                                                                                                                                                                                                                                                                                                                                                                                                                                                                                                                                                                                                                                              |
|---------------------------------|--------------------------------------------------------------------------------------------------------------------------------------------------------------------------------------------------------------------------------------------------------------------------------------------------------------------------------------------------------------------------------------------------------------------------------------------------------------------------------------------------------------------------------------------------------------------------------------------------------------------------------------------------------------------------------------------------------------------------------------------------------------------------------------------------------------------------------------------------------------------------------------------------------------------------------------------------------------------------------------------------------------------------------------------------------------------------------------------------------------------------------------------------------------------------------------------------------------------------------------------------------------------------------------------------------------------------------------------------------------------------------------------------------------------------------------------------------------------------------------------------------------------------------------------------------------------------------------------------------------------------------------------------------------------------------------------------------------------------------------------------------------------------------------------------------------------------------------------------------------------------------------------------------------------------------------------------------------------------------------------------------------------------------------------------------------------------------------------------------------------------------------------------------------------------------------------------------------------------------------------------------------------------------------------------------------------------------------------------------------------------------------------------------------|
| Journal:                        | <i>BMJ Open</i>                                                                                                                                                                                                                                                                                                                                                                                                                                                                                                                                                                                                                                                                                                                                                                                                                                                                                                                                                                                                                                                                                                                                                                                                                                                                                                                                                                                                                                                                                                                                                                                                                                                                                                                                                                                                                                                                                                                                                                                                                                                                                                                                                                                                                                                                                                                                                                                              |
| Manuscript ID                   | bmjopen-2018-024171.R2                                                                                                                                                                                                                                                                                                                                                                                                                                                                                                                                                                                                                                                                                                                                                                                                                                                                                                                                                                                                                                                                                                                                                                                                                                                                                                                                                                                                                                                                                                                                                                                                                                                                                                                                                                                                                                                                                                                                                                                                                                                                                                                                                                                                                                                                                                                                                                                       |
| Article Type:                   | Research                                                                                                                                                                                                                                                                                                                                                                                                                                                                                                                                                                                                                                                                                                                                                                                                                                                                                                                                                                                                                                                                                                                                                                                                                                                                                                                                                                                                                                                                                                                                                                                                                                                                                                                                                                                                                                                                                                                                                                                                                                                                                                                                                                                                                                                                                                                                                                                                     |
| Date Submitted by the Author:   | 02-Jan-2019                                                                                                                                                                                                                                                                                                                                                                                                                                                                                                                                                                                                                                                                                                                                                                                                                                                                                                                                                                                                                                                                                                                                                                                                                                                                                                                                                                                                                                                                                                                                                                                                                                                                                                                                                                                                                                                                                                                                                                                                                                                                                                                                                                                                                                                                                                                                                                                                  |
| Complete List of Authors:       | <p>Ayoub-Charette, Sabrina; Toronto 3D Knowledge Synthesis and Clinical Trials Unit, Clinical Nutrition and Risk Factor Modification Centre, St. Michael's Hospital, Toronto, Ontario, Canada; Department of Nutritional Sciences, Faculty of Medicine, University of Toronto, Toronto, Ontario, Canada</p> <p>Liu, Qi; Toronto 3D Knowledge Synthesis and Clinical Trials Unit, Clinical Nutrition and Risk Factor Modification Centre, St. Michael's Hospital, Toronto, Ontario, Canada; Department of Nutritional Sciences, Faculty of Medicine, University of Toronto, Toronto, Ontario, Canada</p> <p>Khan, Tauseef ; Toronto 3D Knowledge Synthesis and Clinical Trials Unit, Clinical Nutrition and Risk Factor Modification Centre, St. Michael's Hospital, Toronto, Ontario, Canada; Department of Nutritional Sciences, Faculty of Medicine, University of Toronto, Toronto, Ontario, Canada</p> <p>Au-Yeung, Fei; Toronto 3D Knowledge Synthesis and Clinical Trials Unit, Clinical Nutrition and Risk Factor Modification Centre, St. Michael's Hospital, Toronto, Ontario, Canada; Department of Nutritional Sciences, Faculty of Medicine, University of Toronto, Toronto, Ontario, Canada</p> <p>Blanco Mejia, Sonia; Clinical Nutrition and Risk Factor Modification Centre, St. Michael's Hospital; Toronto 3D Knowledge Synthesis and Clinical Trials Unit, St. Michael's Hospital</p> <p>de Souza, Russell; Toronto 3D Knowledge Synthesis and Clinical Trials Unit, Clinical Nutrition and Risk Factor Modification Centre, St. Michael's Hospital, Toronto, Ontario, Canada; McMaster University, Department of Health Research Methods, Evidence, and Impact, Hamilton, Ontario, Canada</p> <p>Wolever, Thomas M. S.; Department of Nutritional Sciences, Faculty of Medicine, University of Toronto, Toronto, Ontario, Canada; Division of Endocrinology and Metabolism, St. Michael's Hospital, Toronto, Ontario, Canada</p> <p>Leiter, Lawrence; Division of Endocrinology and Metabolism, St. Michael's Hospital, Toronto, Ontario, Canada; Li Ka Shing Knowledge Institute, St. Michael's Hospital, Toronto, Ontario, Canada</p> <p>Kendall, Cyril; University of Toronto, Nutritional Sciences</p> <p>Sievenpiper, John; McMaster University, Department of Pathology and Molecular Medicine; St. Michael's Hospital, Clinical Nutrition and Risk Factor Modification Centre</p> |
| <b>Primary Subject Heading</b>: | Nutrition and metabolism                                                                                                                                                                                                                                                                                                                                                                                                                                                                                                                                                                                                                                                                                                                                                                                                                                                                                                                                                                                                                                                                                                                                                                                                                                                                                                                                                                                                                                                                                                                                                                                                                                                                                                                                                                                                                                                                                                                                                                                                                                                                                                                                                                                                                                                                                                                                                                                     |

1  
2  
3  
4  
5  
6  
7  
8  
9  
10  
11  
12  
13  
14  
15  
16  
17  
18  
19  
20  
21  
22  
23  
24  
25  
26  
27  
28  
29  
30  
31  
32  
33  
34  
35  
36  
37  
38  
39  
40  
41  
42  
43  
44  
45  
46  
47  
48  
49  
50  
51  
52  
53  
54  
55  
56  
57  
58  
59  
60

|                            |                                                                                                                    |
|----------------------------|--------------------------------------------------------------------------------------------------------------------|
| Secondary Subject Heading: | Rheumatology, Diabetes and endocrinology                                                                           |
| Keywords:                  | uric acid, systematic review and meta-analysis, gout, sugars, fructose, food sources of fructose containing sugars |
|                            |                                                                                                                    |



1  
2 1 **Important food sources of fructose-containing sugars and incident gout:**  
3 2 **A systematic review and meta-analysis of prospective cohort studies**  
4 3  
5 4  
6 5  
7 6

8 5 **Sabrina Ayoub-Charette<sup>1,2</sup>, Qi Liu<sup>1,2</sup>, Tauseef Ahmad Khan<sup>1,2</sup>, Fei Au-Yeung<sup>1,2</sup>, Sonia Blanco Mejia<sup>1,2</sup>,**  
9  
10 6 **Russell J de Souza<sup>1,2,4</sup>, Thomas MS Wolever<sup>1,2,3,5</sup>, Lawrence A Leiter<sup>1,2,3,5</sup>, Cyril WC Kendall<sup>1,2,6</sup>, John L.**  
11  
12 7 **Sievenpiper<sup>1,2,3,5</sup>**  
13  
14 8  
15 9

17 10 <sup>1</sup>Toronto 3D Knowledge Synthesis and Clinical Trials Unit, Clinical Nutrition and Risk Factor  
18  
19 11 Modification Centre, St. Michael's Hospital, Toronto, Ontario, Canada, <sup>2</sup>Department of Nutritional  
20  
21 12 Sciences, Faculty of Medicine, University of Toronto, Toronto, Ontario, Canada, <sup>3</sup>Division of  
22  
23 13 Endocrinology and Metabolism, St. Michael's Hospital, Toronto, Ontario, Canada, <sup>4</sup>McMaster  
24  
25 14 University, Department of Health Research Methods, Evidence, and Impact, Hamilton, Ontario,  
26  
27 15 Canada, <sup>5</sup>Li Ka Shing Knowledge Institute, St. Michael's Hospital, Toronto, Ontario, Canada, <sup>6</sup>College  
28 16 of Pharmacy and Nutrition, University of Saskatchewan, Saskatoon, Saskatchewan, Canada.  
29  
30 17  
31  
32 18  
33  
34 19  
35 20  
36  
37 21  
38  
39 22  
40  
41 23  
42

43 24 **Corresponding Author:**

44  
45 25 John L Sievenpiper MD, PhD, FRCPC, Toronto 3D Knowledge Synthesis and Clinical Trials Unit, St.  
46 26 Michael's Hospital, 6137-61 Queen Street East, Toronto, ON, M5C 2T2, CANADA, Tel: +1-416 867-  
47 27 3732, Fax: 416 867 7495, email: [john.sievenpiper@utoronto.ca](mailto:john.sievenpiper@utoronto.ca)  
48 28

49 29 **Number of Figures:** 2

50 30 **Number of Tables:** 2

51 31 **Supplemental Material:** 3 Tables and 2 Figures

52 32 **Abstract Word Count:** 298

53 33 **Manuscript Word Count:** 3,835

54 34 **Key Words:** sugars, fructose, food sources of fructose containing sugars, gout, uric acid and  
55 35 systematic review, meta-analysis  
56  
57  
58  
59

1  
2 36 **ABSTRACT**

3  
4 37 **Objective:** Sugar-sweetened beverages (SSBs) are associated with hyperuricemia and gout. Whether  
5  
6  
7 38 other important food sources of sugars share this association is unclear.

8  
9 39 **Design:** To assess the relation of important food-sources of fructose-containing sugars with incident  
10  
11  
12 40 gout and hyperuricemia, we conducted a systematic review and meta-analysis of prospective cohort  
13  
14 41 studies.

15  
16 42 **Methods:** We searched MEDLINE, EMBASE and the Cochrane Library (through September 13, 2017).  
17  
18  
19 43 We included prospective cohort studies that investigated the relationship between food sources of  
20  
21  
22 44 sugar and incident gout or hyperuricemia. Two independent reviewers extracted relevant data and  
23  
24 45 assessed the risk of bias. We pooled natural-log transformed risk ratios (RRs) using the generic inverse  
25  
26 46 variance method with random effects model and expressed as RR with 95% confidence intervals (CIs).  
27  
28  
29 47 The overall certainty of the evidence was assessed using the Grading of Recommendations  
30  
31 48 Assessment, Development and Evaluation (GRADE) system.

32  
33  
34 49 **Results:** We identified three studies (154,289 participants, 1,761 cases of gout), comparing the  
35  
36 50 highest with the lowest level of exposure for SSBs, fruit juice and fruits. No reports were found  
37  
38  
39 51 reporting incident hyperuricemia. Fruit juice and SSB intake showed an adverse association (fruit  
40  
41 52 juice, RR = 1.77, 95% CI 1.20 to 2.61; SSB, RR = 2.08, 95% CI 1.40 to 3.08), when comparing the highest  
42  
43  
44 53 to lowest intake of the most adjusted models. There was no significant association between fruit  
45  
46 54 intake and gout (RR 0.85, 95% CI 0.63 to 1.14). Strongest evidence was for the adverse association in  
47  
48  
49 55 SSB (moderate certainty), and the weakest evidence was for the adverse association in fruit juice  
50  
51 56 (very low certainty) and the no effect in fruit intake (very low certainty).

52  
53 57 **Conclusion:** There is an adverse association of SSB and fruit juice consumption with gout which does  
54  
55  
56 58 not extend to fruit intake. Further research is likely to improve our estimates.

1  
2 59 **Protocol registration:** ClinicalTrials.gov identifier: NCT02702375  
3  
4  
5 60

6  
7 61 **STRENGTHS AND LIMITATIONS OF THIS STUDY**  
8

- 9 62 - This systematic review and meta-analysis assessed the certainty of the evidence using the  
10  
11 Grading of Recommendations Assessment, Development and Evaluation (GRADE) system.  
12 63  
13  
14 64 - Large prospective cohort studies that were of high quality and had a long duration of follow-up  
15  
16 were included.  
17 65  
18  
19 66 - Most of the pooled results showed good consistency (low between study heterogeneity) and  
20  
21 sugar sweetened beverages showed evidence of a dose-response gradient.  
22 67  
23  
24 68 - Only three prospective cohort studies with low external generalizability were available for  
25  
26 inclusion.  
27 69  
28  
29 70 - The observational design of the prospective cohort studies did not allow for causal inferences  
30  
31 to be drawn.  
32 71  
33  
34 72  
35  
36 73  
37  
38 74  
39  
40  
41 75  
42  
43 76  
44  
45  
46 77  
47  
48 78  
49  
50  
51 79  
52  
53 80  
54  
55  
56 81  
57  
58  
59  
60



## 1 2 82 **INTRODUCTION**

3  
4 83 Gout and associated hyperuricemia are both associated with the development of hypertension,  
5  
6  
7 84 insulin resistance syndrome [1], and cardiovascular disease (CVD) [2]. Different diets have been  
8  
9 85 shown to be associated with the development and severity of gout [3]. Foods that increase net ATP  
10  
11  
12 86 degradation including alcohol and high purine meats, are risk factors for gout [1]. Ingestion of large  
13  
14 87 amounts of the monosaccharide fructose can increase uric acid production during its metabolism in  
15  
16  
17 88 the liver through unregulated phosphorylation of ATP into AMP [1] as demonstrated in randomized  
18  
19 89 controlled trials [4, 5]. Similarly, in cohort studies, high intake of fructose-containing sugars in the  
20  
21  
22 90 form of sugar-sweetened beverages (SSBs) is associated with incident gout [6]. It is unclear whether  
23  
24 91 the association seen for SSBs holds for other important food-sources of fructose-containing sugars,  
25  
26  
27 92 such as fruit and fruit-based products, grains and grain-based products, dairy and dairy-based  
28  
29 93 products and sweets and desserts. As dietary guidelines and public health policy move from nutrient-  
30  
31 94 based recommendations toward food and dietary-based recommendations [3, 4, 7], it is important to  
32  
33  
34 95 understand the contribution of these different food sources of fructose-containing sugars to the  
35  
36 96 association of incident gout. To address this gap, we conducted a systematic review and meta-analysis  
37  
38  
39 97 of prospective cohort studies of the relation of important food sources of fructose-containing sugars  
40  
41 98 with incident gout and hyperuricemia.

## 43 99 44 45 46 100 **METHOD**

### 47 48 101 **Design**

49  
50  
51 102 We followed the Cochrane Handbook for Systematic Reviews of Interventions [8] for the conduct of  
52  
53 103 our systematic review and meta-analysis and reported our results according to the Meta-analysis of  
54  
55  
56 104 Observational Studies in Epidemiology (MOOSE) [9] and preferred Reporting Items for Systematic

1  
2 105 Reviews and Meta-Analysis (PRISMA) [10] guidelines. The study protocol was registered at  
3  
4 106 ClinicalTrials.gov (identifier, NCT02702375).  
5  
6

### 7 107 8 9 108 **Search strategy**

10  
11  
12 109 We conducted systematic searches in MEDLINE, EMBASE and Cochrane through September 13, 2017  
13  
14 110 with no language restriction (**supplementary table 1**). Targeted manual searches served to  
15  
16 111 supplement the database search; these included finding related papers from references of selected  
17  
18 112 papers and review articles, perusing articles with data from major prospective cohorts that usually  
19  
20 113 report dietary data, and speaking to experts in the field.  
21  
22  
23

### 24 114 25 26 115 **Study selection**

27  
28  
29 116 We included prospective cohort studies of  $\geq 1$  year duration that assessed the association of important  
30  
31 117 food sources of fructose-containing sugars including non-alcoholic beverages (SSBs), cereal grain and  
32  
33 118 grain-based products, fruit and fruit-based products, dairy and dairy-based products, and sweets,  
34  
35 119 chocolate and desserts with incident gout or hyperuricemia in participants free from gout or  
36  
37 120 hyperuricemia at the start of the study. One-year duration was chosen as it allows sufficient time for  
38  
39  
40 121 the development of disease.  
41  
42  
43

### 44 122 45 46 123 **Data extraction**

47  
48 124 Two independent reviewers (SAC and QL) extracted relevant data from included studies onto  
49  
50 125 standardized pro forma. Extracted data included sample size, subject characteristics, sources of  
51  
52 126 fructose-containing sugars, exposure levels, duration of follow-up, number of gout or hyperuricemia  
53  
54 127 cases, model adjustments, and the risk ratio with 95% confidence intervals (95% CI) per quantile of  
55  
56  
57  
58  
59  
60

1  
2 128 intake. The main outcome was incident gout or hyperuricemia expressed as risk ratios (RR) with 95%  
3  
4 129 confidence intervals (95% CI). Discrepancies were resolved by consensus.

7 130

### 9 131 **Risk of bias**

11  
12 132 The same two independent reviewers (SAC and QL) assessed each study for risk of bias. Risk of bias  
13  
14 133 was assessed using the Newcastle-Ottawa Scale (NOS) for prospective cohort studies. Points were  
15  
16 134 awarded based on cohort selection, comparability of groups and assessment of outcomes, for a  
17  
18  
19 135 maximum total of 9 points [11]. Studies with  $\geq 6$  points were considered high quality [11]. Difference  
20  
21  
22 136 between reviewers was resolved by consensus.

24 137

### 26 138 **Statistical analyses**

28  
29 139 Primary pooled analyses were conducted using Review Manager (RevMan) 5.3 (The Nordic Cochrane  
30  
31 140 Centre, The Cochrane Collaboration, Copenhagen, Denmark). Sensitivity analysis and the assessments  
32  
33  
34 141 of dose response were performed using Stata 14 (StataCorp, College Station, TX, USA). Natural log-  
35  
36 142 transformed RR for incident gout or hyperuricemia, comparing extreme quantiles (the highest  
37  
38  
39 143 exposure versus the lowest exposure or reference group), were pooled separately for each food  
40  
41 144 source of fructose-containing sugars using the generic inverse variance method with DerSimonian and  
42  
43  
44 145 Laird random effects models and expressed as RRs with 95% CI. To overcome a unit-of-analysis error  
45  
46 146 for studies appearing more than once in the same analysis, we divided participants equally among the  
47  
48  
49 147 multiple comparisons and readjusted the log-standard errors [8]. Inter-study heterogeneity was  
50  
51 148 assessed with the Cochran Q statistic with significance set at  $p < 0.10$  and quantified with the  $I^2$   
52  
53 149 statistic, where  $I^2 \geq 50\%$  represented evidence of substantial heterogeneity [8]. Interaction between  
54  
55  
56 150 food sources was assessed using Cochran Q statistic for between group interaction. We explored

1  
2 151 sources of heterogeneity by sensitivity analyses. Influence analyses, where each study was  
3  
4 152 systematically removed, and effect size was recalculated in the remaining studies, were carried out to  
5  
6  
7 153 explore the influence of individual studies on the pooled risk. As  $\geq 10$  cohort comparisons were not  
8  
9 154 available, *a priori* subgroup analyses were not performed. Linear and non-linear dose-response  
10  
11 155 analyses were assessed using generalized least squares trend estimation models (GLST) and fixed-  
12  
13  
14 156 effects restricted cubic spline model with 3 knots, respectively [12]. Publication bias was not assessed  
15  
16  
17 157 as the number of cohort comparisons was less than 10.  
18

### 21 159 **Grading of the evidence**

24 160 The overall certainty and the strength of the evidence was assessed using the Grading of  
25  
26 161 Recommendations Assessment, Development and Evaluation (GRADE) system [13-25]. The evidence  
27  
28  
29 162 was graded as high, moderate, low, or very low certainty, with observational studies starting with an  
30  
31 163 initial grade of 'low'. This then can be downgraded based on 5 pre-specified criteria or upgraded  
32  
33  
34 164 based on 3 pre-specified criteria. Criteria to downgrade included risk of bias (weight of studies  
35  
36 165 showed risk of bias as assessed by low NOS  $< 6$ ), inconsistency (substantial unexplained inter-study  
37  
38  
39 166 heterogeneity i.e.  $I^2 > 50\%$ ), indirectness (presence of factors that limit the generalizability of the  
40  
41 167 results), imprecision in the pooled risk estimate (the 95% CI for risk estimates are wide or cross a  
42  
43  
44 168 minimally important difference of 10% for benefit or harm (RR 0.9–1.1)), and publication bias  
45  
46 169 (evidence of small-study effect). Conversely, criteria to upgrade included a large magnitude of effect  
47  
48 170 (RR  $> 2$  or RR  $< 0.5$  in the absence of plausible confounders), dose–response gradient or reasonable  
49  
50  
51 171 evidence of attenuation of the pooled effect estimate by confounders.  
52

### 53 172 **Patient and public involvement**

1  
2 174 The study was performed using published data. No patients or the public were involved in the study.  
3

4 175

## 7 176 RESULTS

### 9 177 Search results

11  
12 178 **Figure 1** shows the flow of the systematic search and study selection. Of the 309 reports identified by  
13  
14 179 the literature search, three reports with data from three prospective cohort studies met our inclusion  
15  
16 180 criteria [26-28]: Nurses' Health Study (NHS) [27], Health Professionals Follow-up Study (HPFS) [26] and  
17  
18  
19 181 the National Runner's Health Study [28]. All three reports reported the association of food sources of  
20  
21 182 fructose-containing sugars on incident gout, but none on incident hyperuricemia. These reports  
22  
23  
24 183 involved a total of 154,289 participants with 1,761 incident cases of gout. Two reports each reported  
25  
26 184 data on fruit intake [n= 75,383; 983 cases] [26, 28], fruit juice [n= 125,299; 1,533 cases] [26, 27] and  
27  
28  
29 185 SSBs [n=125,299; 983 cases] [26, 27]. We did not identify prospective cohort studies reporting the  
30  
31 186 association of other food sources of fructose-containing sugars (e.g. cereal grain and grain-based  
32  
33  
34 187 products, sweets and desserts, dairy and dairy based products and chocolate) with incident gout  
35  
36 188 fitting our inclusion criteria.  
37

38  
39 189

### 41 190 Study characteristics

42  
43 191 **Table 1** lists the characteristics of the included prospective cohort studies. All studies were performed  
44  
45  
46 192 in the USA. The median age of the included participants ranged from 30 to 75 years. The median  
47  
48 193 follow-up period was 17 years (range, 12 to 22 years) for SSB, 18.7 years (12 to 22 years) for fruit juice  
49  
50  
51 194 and 9.9 years (7.74 to 12 years) for fruit. Dietary intake assessments were done with self-reported,  
52  
53 195 validated food frequency questionnaires (FFQs) in all studies. Quantiles of exposure depended on the  
54  
55  
56 196 food source. Medians for the lowest and highest quantiles of exposure were <1 servings/month and

1  
2 197 ≥14 servings/week respectively for SSB; ≤1 servings/month and ≥14 servings/week respectively for  
3  
4 198 fruit juice; and ≤0.4 servings/week (range, <0-0.5 servings/week) and ≥8 servings/day (range, ≥2-14  
5  
6  
7 199 servings/day), respectively for fruit. The ascertainment of incident gout in both HPFS and NHS cohorts  
8  
9 200 [26, 27] was through self-report, followed by supplementary surveys of the subjects based on the  
10  
11  
12 201 American College of Rheumatology gout survey criteria [29] to confirm that the diagnosis. The authors  
13  
14 202 defined individuals with gout that met ≥6 of the 11 criteria for gout. In addition, in a sub-sample the  
15  
16  
17 203 self-reported diagnoses were validated with medical records. As for the NRHS cohort [28], incident  
18  
19 204 gout was self-reported based upon physician diagnosis.  
20  
21  
22 205

23  
24 206 **Supplementary table 2** shows the complete list of adjusted confounding variables for the most  
25  
26 207 adjusted models for each of the included prospective cohorts. The median number of variables in the  
27  
28  
29 208 most adjusted models was 14 (range, 6 to 14). All studies adjusted for primary and secondary  
30  
31 209 confounders such as age, body mass index (BMI) and history of hypertension. Each of the three  
32  
33  
34 210 cohorts were single-sex studies, so adjustment for sex was not necessary. The NHS cohort study  
35  
36 211 authored by Choi *et al.* 2010 [27] and NRHS study by Williams *et al.* [28] were agency funded, while  
37  
38  
39 212 the HPFS paper authored by Choi *et al.* 2008 [26] was funded by both agency and industry.  
40

### 41 213 42 43 214 **Study Quality**

44  
45  
46 215 **Supplementary table 3** shows the study quality assessments by the NOS scale. There was no evidence  
47  
48 216 of serious risk of bias. Only NRHS cohort scored <6 on the NOS scale, which denotes lower quality  
49  
50  
51 217 [28].  
52

### 53 218 54 55 219 **Fruit intake on incident gout**

1  
2 220 **Figure 2** shows the relationship between food sources of fructose-containing sugars intake and  
3  
4 221 incident gout. There was significant interaction between the food sources ( $p=0.02$ ). When comparing  
5  
6  
7 222 the highest to the lowest fruit intake, no association was shown for fruit intake on incident gout (RR =  
8  
9 223 0.85, [95% CI 0.63 to 1.14]). There was evidence of significant interstudy heterogeneity ( $I^2 = 93\%$ ,  
10  
11  
12 224  $p<0.001$ ).

### 13 14 225 15 16 226 **Fruit juice intake on incident gout**

17  
18  
19 227 **Figure 2** shows the relationship between fruit juice intake and incident gout. When comparing the  
20  
21  
22 228 highest to lowest intake, an adverse association was shown for fruit juice intake on incident gout (RR  
23  
24 229 1.77, [95% CI 1.20 to 2.61]). There was no evidence of significant interstudy heterogeneity ( $I^2 = 0\%$   
25  
26 230 [95% CI 0% to 90%],  $p = 0.54$ ).

### 27 28 29 231 30 31 232 **SSB intake on incident gout**

32  
33  
34 233 **Figure 2** shows the relationship between SSB intake and incident gout. When comparing the highest  
35  
36 234 with the lowest intake, an adverse association was shown for SSB intake on incident gout (RR=2.08  
37  
38  
39 235 [95% CI 1.40 to 3.08]). There was no evidence of significant interstudy heterogeneity ( $I^2 = 0\%$ ,  $p =$   
40  
41 236 0.52).

### 42 43 237 44 45 46 238 **Additional analysis**

47  
48 239 Influence analysis (the systematic removal of each study), publication bias and subgroup analyses  
49  
50  
51 240 could not be performed due to the small number of studies included in each analysis ( $n=2$ ).

### 52 53 241 54 55 56 242 **Dose-response analysis**

1  
2 243 A random-effect GLST model showed a significant dose-response relationship between fruit juice  
3  
4 244 intake and incident gout per serving/week (RR = 1.03, 95% CI 1.02 to 1.05,  $p < 0.001$ ) (**supplementary**  
5  
6  
7 245 **figure 1**), and for SSB intake (RR = 1.04, 95% CI 1.02 to 1.07,  $p < 0.001$ ) (**supplementary figure 2**). Fruit  
8  
9 246 juice intake showed a significant departure from linearity ( $p = 0.038$ ), and visual inspection of the  
10  
11  
12 247 graph (**supplementary figure 1**) indicated a plateau for risk increase after  $\geq 5$  servings per day. There  
13  
14 248 was no evidence for departure from linear dose response gradient or dose thresholds for SSB intake  
15  
16  
17 249 while using the restricted cubic spline model ( $p = 1.29$ ) (**supplementary figure 2**). Dose-response  
18  
19 250 modeling was not conducted for fruit intake due to lack of data.  
20  
21  
22 251

## 24 252 **GRADE assessment**

25  
26 253 **Table 2** shows the GRADE assessment of individual food sources of fructose-containing sugars. The  
27  
28  
29 254 certainty of the evidence for an adverse association from both fruit and fruit juice was rated as very  
30  
31 255 low, with downgrades to the lowest level for indirectness for fruit juice intake, and for inconsistency,  
32  
33  
34 256 indirectness and imprecision for fruit intake. The certainty of the evidence for an adverse association  
35  
36 257 of SSB intake with incident gout was rated as moderate, with a downgrade of one level for  
37  
38  
39 258 indirectness but upgrade of two levels for a large magnitude effect and significant dose-response  
40  
41 259 association.  
42  
43  
44 260

## 46 261 **DISCUSSION**

47  
48 262 We conducted a systematic review and meta-analysis of studies investigating the relation of  
49  
50  
51 263 important food sources of fructose-containing sugars with incident gout. We identified three  
52  
53 264 prospective cohort studies [26-28] comprising of 154,289 participants and 1,761 cases of incident  
54  
55  
56 265 gout. The pooled analyses revealed that there was a moderate certainty of evidence that SSB intake  
57  
58  
59  
60



1  
2 266 was associated with 208% increase in risk of incident gout when comparing the highest with the  
3  
4 267 lowest intake. Similarly, there was a low certainty of evidence that fruit juice intake was associated  
5  
6  
7 268 with a 77% increase in risk of incident gout, but fruit intake did not show any significant association  
8  
9 269 with incident gout (low certainty of evidence). There was no data available of other important food  
10  
11  
12 270 sources of fructose-containing sugars.

13  
14 271  
15

## 16 272 **Findings in the context of the literature**

18  
19 273 Our results are consistent with previous research which indicate that the intake of certain food  
20  
21  
22 274 sources of fructose-containing sugars is associated with the risk of gout. Our previous systematic  
23  
24 275 review and meta-analysis of prospective cohort studies found a harmful relationship between  
25  
26 276 fructose consumption and gout [6]. While that study indicated that fructose moiety might possibly  
27  
28  
29 277 drive the association with gout, all the fructose data in the included studies was derived from SSB  
30  
31 278 intake. Another systematic review of the literature identified numerous dietary factors associated  
32  
33  
34 279 with the risk of gout including meat, alcohol, seafood and SSBs, but also that lower risk was associated  
35  
36 280 with the intake of dairy, folate and coffee [3].

37  
38  
39 281  
40

41 282 SSBs are a major source of fructose-containing added sugars in the western diet comprising around  
42  
43  
44 283 30% of intake of added sugars in the USA [30] and around 24% in Canada [31]. Excess intake of  
45  
46 284 fructose can increase uric acid through an unregulated phosphofructose kinase pathway that uses  
47  
48 285 substantial amounts of ATP [32] to convert fructose into fructose-1-phosphate in the liver [33].  
49  
50  
51 286 Mechanistically, net ATP degradation leads to accumulation of AMP, which is subsequently degraded  
52  
53 287 to uric acid. Additionally, fructose can increase de novo purine synthesis, which further produces uric  
54  
55  
56 288 acid [1]. This increase in uric acid can lead to the development of gout. Since we were unable to

57  
58  
59  
60

1  
2 289 investigate the relationship between food sources of fructose-containing sugars and hyperuricemia,  
3  
4 290 we cannot validate this mechanism. It is possible, that fructose increases the risk of gout  
5  
6  
7 291 independently of serum uric acid levels. However, since the link between fructose and serum uric acid  
8  
9 292 [34-37], and the link between serum uric acid and the development of gout have been independently  
10  
11 293 established [1], it is unlikely that fructose increases the risk of gout without using uric acid as an  
12  
13  
14 294 intermediate.

15  
16 295  
17  
18  
19 296 We identified adverse association of fruit juices intake with incident gout. The two studies that  
20  
21 297 contributed to this result [26, 27] were both performed in two Harvard cohorts which do not  
22  
23  
24 298 differentiate between fruit drinks and pure fruit juice, the former being largely similar to SSBs i.e.  
25  
26 299 mainly sugar and water. This difference between pure fruit juice and fruit drink is supported by  
27  
28  
29 300 studies investigating pure fruit juice and fruit drinks that show divergent response for cardiometabolic  
30  
31 301 disease [38, 39].

32  
33 302  
34  
35  
36 303 We did not see any association between fruit intake and incident gout but the individual effect  
37  
38 304 estimates from the two studies were in opposite direction. The NRHS [28] cohort showed a 51%  
39  
40  
41 305 reduction in the risk of gout with high intake of fruit whereas the HPFS [26] cohort showed a 63%  
42  
43 306 increased risk; both studies were performed in men. These discordant results highlight the differences  
44  
45  
46 307 in the studies. HPFS cohort [26] only measured oranges and apples, fruit high in fructose, while NRHS  
47  
48 308 [28] cohort assessed all fruit which might represent a healthier dietary intake. It is also possible that  
49  
50  
51 309 higher intake of fruits in NRHS might be associated with high intake of dairy or coffee, which have  
52  
53 310 been associated with lowering the risk of gout [3]. As the data on dairy and coffee was not reported  
54  
55  
56 311 by NRHS, this remains a speculation. The harmful association for oranges, which are rich in vitamin C,

1  
2 312 in HPFS [26] cohort is at odds with another study from the same cohort, in which the authors  
3  
4 313 demonstrated a protective association of vitamin C intake with gout [40]. While fruits are rich in  
5  
6  
7 314 fructose which can increase uric acid levels, fruit intake has consistently shown a benefit for  
8  
9 315 cardiometabolic risk factors, cardiometabolic diseases and all cause-mortality [41-47]. Several case-  
10  
11  
12 316 control and cross-sectional studies have shown a protective effect of total fruit intake with gout albeit  
13  
14 317 only in Asian populations [48, 49], their relevance to the included studies, conducted in a largely  
15  
16  
17 318 Caucasian population, might be limited. More data from different populations might clarify the  
18  
19 319 association between fruit intake and gout.

20  
21  
22 320  
23  
24 321 We could not find any prospective studies looking at the association of food sources of fructose-  
25  
26 322 containing sugars and hyperuricemia even though hyperuricemia is the most important risk factor for  
27  
28  
29 323 gout [3, 50]. Hyperuricemia is also a risk factor for hypertension , metabolic syndrome, diabetes , and  
30  
31 324 CVD [51]. Several cross-sectional analyses have investigated the link between SSB consumption and  
32  
33  
34 325 serum uric acid levels, showing a positive relationship [34-37]. In contrast, the analysis of the National  
35  
36 326 Health and Nutrition Examination Survey (NHANES) showed no link between dietary fructose and risk  
37  
38  
39 327 of hyperuricemia, indicating that perhaps different food sources of fructose-containing sugars may  
40  
41 328 have different effects on serum uric acid. This point is reinforced by another analysis of NHANES data  
42  
43  
44 329 that showed a relationship of SSB intake with higher serum uric acid concentration, but not with fruit  
45  
46 330 juice [52]. Future studies investigating food sources of sugars and risk of hyperuricemia may help to  
47  
48 331 elucidate some of the above inconsistent findings.

49  
50  
51 332  
52  
53 333 We were not been able to find prospective cohort studies investigating the association of other food  
54  
55  
56 334 sources of fructose-containing sugars and the risk of gout though cross-sectional studies suggest that

1  
2 335 cereal and yogurt may be associated with lower serum uric acid [53]. More research is needed to  
3  
4 336 assess the relationship between other food sources of fructose-containing sugars and the risk of gout.  
5  
6

7 337  
8  
9 338 **Strengths and limitations**  
10

11  
12 339 Our analysis has many strengths. First, we employed a comprehensive systematic search across major  
13  
14 340 databases and the quantitative synthesis of results. Second, the studies we included had a substantial  
15  
16 341 number of participants and cases of gout (154,289 participants and 1,761 gout cases) providing  
17  
18 342 increased precision. Additionally, the median follow-up duration was greater than 10 years, which  
19  
20 343 allowed for enough time from exposure for the development of disease. Another strength is the use  
21  
22 344 of validated measures of intake like food frequency questionnaires. The two Harvard cohorts [26, 27]  
23  
24 345 administered FFQ multiple times, and validated them on a subsample, allowing for more accurate and  
25  
26 346 robust long-term intakes compared to the NRHS [28] cohort, which only measured dietary intakes at  
27  
28 347 baseline. In our analysis, we made use of GRADE to evaluate the certainty and strength of our analysis  
29  
30 348 and evaluate our confidence in the estimates.  
31  
32  
33  
34  
35

36 349  
37  
38 350 There are some notable limitations to our systematic review and meta-analysis. First, while we  
39  
40 351 included the most adjusted multivariable models for this analysis, there is always potential for  
41  
42 352 unmeasured and residual confounding, since the studies included were observational in nature. This  
43  
44 353 explains why GRADE starts at “low certainty” for observational studies. Second, there was evidence of  
45  
46 354 indirectness in some of the relationships. All studies were conducted in the USA, and two of the three  
47  
48 355 studies were conducted in health professionals. The two Harvard [26, 27] cohorts included only  
49  
50 356 middle aged or older people who worked in health care and who were predominately white and the  
51  
52 357 NRHS [28] cohort included only middle to old aged physically active men. Thus, the specific nature of  
53  
54  
55  
56  
57  
58  
59  
60

1  
2 358 the included studies' population limits the generalizability of our results to other populations and  
3  
4 359 geographical locations; however, the biological process of diet and gout are still likely to be similar to  
5  
6  
7 360 other populations. While, genome wide association studies have found numerous genes that increase  
8  
9 361 one's risk for gout [54] and some ethnic groups may be more susceptible than others [1], it is not  
10  
11  
12 362 known if the association of fructose intake with gout is modified by genes. Third, sources of  
13  
14 363 heterogeneity remained unexplained; with only three studies, we were unable to assess publication  
15  
16  
17 364 bias or perform sensitivity analysis though an a priori subgroup analysis. Thus, for these reasons, data  
18  
19 365 pertaining to SSB and fruit juice intake and incident gout received a GRADE of moderate and very low  
20  
21  
22 366 certainty, respectively, indicating that further studies in this regard is likely to impact our certainty in  
23  
24 367 the effect estimate and may change the estimate for SSB and that our certainty in the estimate for  
25  
26 368 fruit juice is very uncertain; therefore, caution should be used when interpreting these results.  
27  
28  
29 369 Similarly, for fruit, which received a GRADE of very low, so we are very uncertain in these results and  
30  
31 370 caution should be used in the interpretation of these results.  
32  
33

### 34 371 35 36 372 **Implications**

37  
38  
39 373 Dietary guidelines have shifted their focus from nutrient-based recommendations to food and dietary  
40  
41 374 pattern-based recommendations [55], since it has been recognized that one does not eat nutrients in  
42  
43  
44 375 isolation but as a part of foods. Interactions between nutrients in food are complex and the whole  
45  
46 376 food matrix works as a whole to increase or decrease disease risk [55]. Our findings support this view  
47  
48 377 of food matrix affect independent of a single-nutrient in relation to food sources of fructose-  
49  
50  
51 378 containing sugars and their relationship with gout.  
52

1  
2 380 Our findings also have implications for recommendations for the prevention of gout. Conventional  
3  
4 381 dietary recommendations for gout have focused on restriction of purine intake; however, low-purine  
5  
6  
7 382 diets are often high in carbohydrates, including fructose-rich foods [56]. We have shown an adverse  
8  
9 383 association between fruit juice and SSBs, supporting the recommendations to limit their intakes. Since  
10  
11  
12 384 we did not have data relating to children, hyperuricemia or other food sources of fructose-containing  
13  
14 385 sugars, we cannot extend our conclusion to these groups of individuals or these foods.  
15  
16  
17 386

## 19 387 **Conclusion**

20  
21  
22 388 Our systematic review and meta-analysis of prospective cohort studies showed an adverse association  
23  
24 389 between SSBs and fruit juice with the risk of gout, while there was no association with fruit intake.

25  
26 390 The strength of the evidence was moderate for SSB intake and very low for fruit juice and fruit intake,  
27  
28  
29 391 as assessed by GRADE. For SSBs, the true association is likely to be close to the estimate, but there is a  
30  
31 392 possibility that it is substantially different. For fruit juice and fruit intake, the true association are likely  
32  
33  
34 393 to be substantially different from the estimate and future research will very likely impact our  
35  
36 394 confidence in the effect estimates and likely to change them [57]. Our results are consistent with the  
37  
38  
39 395 literature that certain food sources of fructose-containing sugars especially SSBs are a risk factor for  
40  
41 396 the development of gout. We were unable to identify studies assessing food sources of fructose-  
42  
43  
44 397 containing sugars and hyperuricemia, indicating a gap in the literature. Given that incident gout is  
45  
46 398 rising in many countries [7, 58-63], and that gout and hyperuricemia are both associated with  
47  
48  
49 399 metabolic syndrome, myocardial infarction, diabetes and premature death [1, 2, 64], it is becoming  
50  
51 400 increasingly important to identify and understand risk factors for developing gout. It is imperative for  
52  
53 401 additional prospective studies to assess the intake of various food sources of fructose-containing  
54  
55  
56 402 sugars and their relationship with gout and hyperuricemia in diverse populations. This will help  
57  
58  
59  
60

1  
2 403 identify to what extent does our foods mediate the risk for hyperuricemia and gout and will further  
3  
4 404 inform health care professionals, policymakers, and aid in the development of improved dietary  
5  
6  
7 405 guidelines for the prevention and management of gout and hyperuricemia.  
8

9  
10 406

## 11 12 407 **Funding Statement**

13  
14 408 This work was funded by the Canadian Institutes of Health Research (funding reference number,  
15  
16 409 129920). The Diet, Digestive tract, and Disease (3-D) Centre, funded through the Canada Foundation  
17  
18  
19 410 for Innovation (CFI) and the Ministry of Research and Innovation's Ontario Research Fund (ORF),  
20  
21 411 provided the infrastructure for the conduct of this project. **JL Sievenpiper** was funded by a PSI  
22  
23  
24 412 Graham Farquharson Knowledge Translation Fellowship, Canadian Diabetes Association (CDA)  
25  
26 413 Clinician Scientist award, CIHR INMD/CNS New Investigator Partnership Prize, and Banting & Best  
27  
28  
29 414 Diabetes Centre Sun Life Financial New Investigator Award. None of the sponsors had a role in any  
30  
31 415 aspect of the present study, including design and conduct of the study; collection, management,  
32  
33  
34 416 analysis, and interpretation of the data; and preparation, review, approval of the manuscript or  
35  
36 417 decision to publish.  
37

38  
39 418

## 40 41 419 **Data Sharing**

42  
43 420 There is no additional unpublished data available from the study.  
44  
45

46 421  
47

## 48 422 **Competing Interests**

49  
50  
51 423 **TA Khan** has received research support from the Canadian Institutes of health Research (CIHR), an  
52  
53 424 unrestricted travel donation from Bee Maid Honey Ltd and has been an invited speaker at the Calorie  
54  
55  
56 425 Control Council annual meeting. **RJ de Souza** has served as an external resource person to the World  
57  
58

59  
60

1  
2 426 Health Organization (WHO) Nutrition Guidance Expert Advisory Group (NUGAG) Subgroup on Diet and  
3  
4 427 Health (guidelines for trans fats and saturated fats), and received remuneration from WHO for travel  
5  
6  
7 428 and accommodation. He also received compensation for contract research conducted for the Institute  
8  
9 429 of Nutrition, Metabolism, and Diabetes at the Canadian Institutes of Health Research (CIHR), Health  
10  
11  
12 430 Canada and WHO. He has received research grants from the Canadian Foundation for Dietetic  
13  
14 431 Research and CIHR, and lecture fees from McMaster Children's Hospital. **TMS Wolever** and his wife  
15  
16  
17 432 are part owners and employees of Glycemic Index Laboratories. **CWC Kendall** has received research  
18  
19 433 support from the Advanced Foods and Materials Network, Agricultural Bioproducts Innovation  
20  
21  
22 434 Program through the Pulse Research Network, Agriculture and Agri-Food Canada, Almond Board of  
23  
24 435 California, Barilla, Calorie Control Council, CIHR, Canola Council of Canada, The International Tree Nut  
25  
26  
27 436 Council Nutrition Research & Education Foundation, Kellogg, Loblaw Companies Ltd., Pulse Canada,  
28  
29 437 Saskatchewan Pulse Growers and Unilever. He has received consultant fees from American Pistachio  
30  
31  
32 438 Growers; speaker fees from American Peanut Council, Tate & Lyle and The WhiteWave Foods  
33  
34 439 Company; and travel funding from Sabra Dipping Company, Tate & Lyle, International Tree Nut  
35  
36 440 Council Research & Education Foundation, California Walnut Commission, Sun-Maid, The Peanut  
37  
38  
39 441 Institute, General Mills, Oldways Foundation and International Nut and Dried Fruit Council  
40  
41 442 Foundation. He is on the Clinical Practice Guidelines Expert Committee for Nutrition Therapy of the  
42  
43  
44 443 European Association for the Study of Diabetes (EASD). He is a member of the International  
45  
46 444 Carbohydrate Quality Consortium (ICQC), Secretary of the Diabetes and Nutrition Study Group (DNSG)  
47  
48  
49 445 of the EASD, and a Director of the Toronto 3D Knowledge Synthesis and Clinical Trials foundation. **JL**  
50  
51 446 **Sievenpiper** has received research support from the CIHR, Canadian Diabetes Association (CDA), PSI  
52  
53 447 Foundation, Banting and Best Diabetes Centre (BBDC), Canadian Nutrition Society (CNS), American  
54  
55  
56 448 Society for Nutrition (ASN), Calorie Control Council, INC International Nut and Dried Fruit Council  
57  
58  
59  
60



1  
2 449 Foundation, National Dried Fruit Trade Association, The Tate and Lyle Nutritional Research Fund at  
3  
4 450 the University of Toronto, and The Glycemic Control and Cardiovascular Disease in Type 2 Diabetes  
5  
6  
7 451 Fund at the University of Toronto (a fund established by the Alberta Pulse Growers). He has received  
8  
9 452 speaker fees and/or honoraria from the CDA, CNS, Dr. Pepper Snapple Group, Dairy Farmers of  
10  
11  
12 453 Canada, Nutrition Foundation of Italy (NFI), C3 Collaborating for Health, Sprim Brasil, WhiteWave  
13  
14 454 Foods, Rippe Lifestyle, mdBriefcase, Alberta Milk, FoodMinds LLC, Memac Ogilvy & Mather LLC,  
15  
16  
17 455 PepsiCo, The Ginger Network LLC, International Sweeteners Association, and Pulse Canada. He has ad  
18  
19 456 hoc consulting arrangements with Winston & Strawn LLP, Perkins Coie LLP, and Tate & Lyle. He is a  
20  
21  
22 457 member of the European Fruit Juice Association Scientific Expert Panel. He is on the Clinical Practice  
23  
24 458 Guidelines Expert Committees of the CDA, European Association for the study of Diabetes (EASD), and  
25  
26  
27 459 Canadian Cardiovascular Society (CCS), as well as an expert writing panel of the ASN. He serves as an  
28  
29 460 unpaid scientific advisor for the Food, Nutrition, and Safety Program (FNSP) and the Technical  
30  
31 461 Committee on Carbohydrates of the International Life Science Institute (ILSI) North America. He is a  
32  
33  
34 462 member of the International Carbohydrate Quality Consortium (ICQC), Executive Board Member of  
35  
36 463 the Diabetes and Nutrition Study Group (DNSG) of the EASD, a Director of the Toronto 3D Knowledge  
37  
38  
39 464 Synthesis and Clinical Trials foundation. His wife is an employee of Unilever Canada. No competing  
40  
41 465 interests were declared by **Q Liu, S Ayoub-Charette, F Au-Yeung, S Blanco Mejia, LA Leiter**. There are  
42  
43  
44 466 no patents, products in development or marketed products to declare.  
45

46 467

#### 48 468 **Authors' contributions**

50 469 All authors had full access to all of the data (including statistical reports and tables) in this study and  
51  
52 470 take full responsibility for the integrity of the data and the accuracy of the data analysis.

54 471 **Conception and design:** J.L. Sievenpiper.

55

56

57

58

59

60

1  
2 472 **Analysis and interpretation of the data:** Q. Liu, S. Ayoub-Charette, T.A.Khan, F. Au-Yeung, S. Blanco  
3  
4 473 Mejia, R.J. de Souza, L.A. Leiter, C.W.C. Kendall, T.M.S. Wolever, J.L. Sievenpiper.

5  
6 474 **Drafting of the article:** S. Ayoub-Charette, Q. Liu, T.A. Khan, J.L. Sievenpiper.

7  
8 475 **Critical revision of the article for important intellectual content:** Q. Liu, S. Ayoub-Charette, T.A. Khan,  
9  
10 476 F. Au-Yeung, S. Blanco Mejia, R.J. de Souza, L.A. Leiter, C.W.C. Kendall, T.M.S. Wolever, J.L.  
11 477 Sievenpiper.

12  
13 478 **Final approval of the article:** Q. Liu, S. Ayoub-Charette, T.A. Khan, F. Au-Yeung, S. Blanco Mejia, R.J. de  
14  
15 479 Souza, L.A. Leiter, C.W.C. Kendall, T.M.S. Wolever, J.L. Sievenpiper.

16  
17 480 **Statistical expertise:** T.A. Khan, R.J. de Souza

18  
19 481 **Obtaining of funding:** J.L. Sievenpiper.

20  
21 482 **Administrative, technical, or logistic support:** S. Blanco Mejia

22 483 **Collection and assembly of data:** Q. Liu, S. Ayoub-Charette, F. Au-Yeung

23  
24 484 **Guarantor:** J.L. Sievenpiper

25 485  
26  
27 486 **REFERENCES**

- 28  
29 487 1. Choi, H.K.M., D. B. Reginato, A. M. American College of, Physicians American Physiological,  
30 488 Society, *Pathogenesis of gout*. Ann Intern Med, 2005. **143**(7): p. 499-516.  
31 489 2. Oparil, S.Z., M. A. Calhoun, D. A., *Pathogenesis of hypertension*. Ann Intern Med, 2003. **139**(9):  
32 490 p. 761-76.  
33 491 3. Singh, J.A., S.G. Reddy, and J. Kundukulam, *Risk factors for gout and prevention: a systematic*  
34 492 *review of the literature*. Curr Opin Rheumatol, 2011. **23**(2): p. 192-202.  
35 493 4. Emmerson, B.T., *Effect of oral fructose on urate production*. Ann Rheum Dis, 1974. **33**(3): p.  
36 494 276-80.  
37 495 5. Fox, I.H. and W.N. Kelley, *Studies on the mechanism of fructose-induced hyperuricemia in man*.  
38 496 *Metabolism*, 1972. **21**(8): p. 713-21.  
39 497 6. Jamnik, J., et al., *Fructose intake and risk of gout and hyperuricemia: a systematic review and*  
40 498 *meta-analysis of prospective cohort studies*. BMJ Open, 2016. **6**(10): p. e013191.  
41 499 7. Trifiro, G., et al., *Epidemiology of gout and hyperuricaemia in Italy during the years 2005-2009:*  
42 500 *a nationwide population-based study*. Ann Rheum Dis, 2013. **72**(5): p. 694-700.  
43 501 8. Higgins, J.P.T. and S. Green. *Cochrane Handbook for Systematic Reviews of Interventions*. The  
44 502 Cochrane Collaboration 2011 March 2011 [cited 2016 November 4th]; Available from:  
45 503 [www.handbook.cochrane.org](http://www.handbook.cochrane.org).  
46 504 9. Stroup, D.F., et al., *Meta-analysis of observational studies in epidemiology: a proposal for*  
47 505 *reporting. Meta-analysis Of Observational Studies in Epidemiology (MOOSE) group*. JAMA,  
48 506 2000. **283**(15): p. 2008-12.  
49 507 10. Moher, D., et al., *Reprint--preferred reporting items for systematic reviews and meta-analyses:*  
50 508 *the PRISMA statement*. Phys Ther, 2009. **89**(9): p. 873-80.  
51  
52  
53  
54  
55  
56  
57  
58  
59  
60

- 1
- 2 509 11. Wells, G.A., et al. *The Newcastle-Ottawa Scale (NOS) for assessing the quality of*
- 3 510 *nonrandomised studies in meta-analyses*. 2000 [cited 2016 November 4]; Available from:
- 4 511 [http://www.ohri.ca/programs/clinical\\_epidemiology/oxford.asp](http://www.ohri.ca/programs/clinical_epidemiology/oxford.asp).
- 5 512 12. Orsini, N., R. Bellocco, and S. Greenland, *Generalized least squares for trend estimation of*
- 6 513 *summarized dose-response data*. *Stata Journal*, 2006. **6**(1): p. 40.
- 7 514 13. Guyatt, G., et al., *GRADE guidelines: 1. Introduction-GRADE evidence profiles and summary of*
- 8 515 *findings tables*. *J Clin Epidemiol*, 2011. **64**(4): p. 383-94.
- 9 516 14. Guyatt, G.H., et al., *GRADE guidelines: 2. Framing the question and deciding on important*
- 10 517 *outcomes*. *J Clin Epidemiol*, 2011. **64**(4): p. 395-400.
- 11 518 15. Balshem, H., et al., *GRADE guidelines: 3. Rating the quality of evidence*. *J Clin Epidemiol*, 2011.
- 12 519 **64**(4): p. 401-6.
- 13 520 16. Guyatt, G.H., et al., *GRADE guidelines: 4. Rating the quality of evidence--study limitations (risk*
- 14 521 *of bias)*. *J Clin Epidemiol*, 2011. **64**(4): p. 407-15.
- 15 522 17. Guyatt, G.H., et al., *GRADE guidelines: 5. Rating the quality of evidence--publication bias*. *J Clin*
- 16 523 *Epidemiol*, 2011. **64**(12): p. 1277-82.
- 17 524 18. Guyatt, G.H., et al., *GRADE guidelines 6. Rating the quality of evidence--imprecision*. *J Clin*
- 18 525 *Epidemiol*, 2011. **64**(12): p. 1283-93.
- 19 526 19. Guyatt, G.H., et al., *GRADE guidelines: 7. Rating the quality of evidence--inconsistency*. *J Clin*
- 20 527 *Epidemiol*, 2011. **64**(12): p. 1294-302.
- 21 528 20. Guyatt, G.H., et al., *GRADE guidelines: 8. Rating the quality of evidence--indirectness*. *J Clin*
- 22 529 *Epidemiol*, 2011. **64**(12): p. 1303-10.
- 23 530 21. Guyatt, G.H., et al., *GRADE guidelines: 9. Rating up the quality of evidence*. *J Clin Epidemiol*,
- 24 531 2011. **64**(12): p. 1311-6.
- 25 532 22. Brunetti, M., et al., *GRADE guidelines: 10. Considering resource use and rating the quality of*
- 26 533 *economic evidence*. *J Clin Epidemiol*, 2013. **66**(2): p. 140-50.
- 27 534 23. Guyatt, G., et al., *GRADE guidelines: 11. Making an overall rating of confidence in effect*
- 28 535 *estimates for a single outcome and for all outcomes*. *J Clin Epidemiol*, 2013. **66**(2): p. 151-7.
- 29 536 24. Guyatt, G.H., et al., *GRADE guidelines: 12. Preparing summary of findings tables-binary*
- 30 537 *outcomes*. *J Clin Epidemiol*, 2013. **66**(2): p. 158-72.
- 31 538 25. Guyatt, G.H., et al., *GRADE guidelines: 13. Preparing summary of findings tables and evidence*
- 32 539 *profiles-continuous outcomes*. *J Clin Epidemiol*, 2013. **66**(2): p. 173-83.
- 33 540 26. Choi, H.K. and G. Curhan, *Soft drinks, fructose consumption, and the risk of gout in men:*
- 34 541 *prospective cohort study*. *BMJ*, 2008. **336**(7639): p. 309-12.
- 35 542 27. Choi, H.K., W. Willett, and G. Curhan, *Fructose-rich beverages and risk of gout in women*.
- 36 543 *JAMA*, 2010. **304**(20): p. 2270-8.
- 37 544 28. Williams, P.T., *Effects of diet, physical activity and performance, and body weight on incident*
- 38 545 *gout in ostensibly healthy, vigorously active men*. *American Journal of Clinical Nutrition*, 2008.
- 39 546 **87**(5): p. 1480-7.
- 40 547 29. Wallace, S.L., et al., *Preliminary criteria for the classification of the acute arthritis of primary*
- 41 548 *gout*. *Arthritis Rheum*, 1977. **20**(3): p. 895-900.
- 42 549 30. Vos, M.B., et al., *Dietary fructose consumption among US children and adults: the Third*
- 43 550 *National Health and Nutrition Examination Survey*. *Medscape J Med*, 2008. **10**(7): p. 160.
- 44 551 31. Brisbois, T.D., et al., *Estimated intakes and sources of total and added sugars in the Canadian*
- 45 552 *diet*. *Nutrients*, 2014. **6**(5): p. 1899-912.
- 46 553 32. Kanbay, M., et al., *Uric acid in metabolic syndrome: from an innocent bystander to a central*
- 47 554 *player*. *European journal of internal medicine*, 2016. **29**: p. 3-8.
- 48
- 49
- 50
- 51
- 52
- 53
- 54
- 55
- 56
- 57
- 58
- 59
- 60

- 1  
2 555 33. Garrett, R., et al., *Biochemistry, First Canadian Edition*. 2013, Toronto ON: Nelson education.  
3 556 34. Choi, J.W., et al., *Sugar-sweetened soft drinks, diet soft drinks, and serum uric acid level: the*  
4 557 *Third National Health and Nutrition Examination Survey*. *Arthritis Rheum*, 2008. **59**(1): p. 109-  
5 558 16.  
6 559 35. Zgaga, L., et al., *The association of dietary intake of purine-rich vegetables, sugar-sweetened*  
7 560 *beverages and dairy with plasma urate, in a cross-sectional study*. *PLoS One*, 2012. **7**(6): p.  
8 561 e38123.  
9 562 36. Bomback, A.S., et al., *Sugar-sweetened soda consumption, hyperuricemia, and kidney disease*.  
10 563 *Kidney Int*, 2010. **77**(7): p. 609-16.  
11 564 37. Meneses-Leon, J., et al., *Sweetened beverage consumption and the risk of hyperuricemia in*  
12 565 *Mexican adults: a cross-sectional study*. *BMC Public Health*, 2014. **14**: p. 445.  
13 566 38. Griep, L.M.O., et al., *Raw and processed fruit and vegetable consumption and 10-year coronary*  
14 567 *heart disease incidence in a population-based cohort study in the Netherlands*. *PLoS One*, 2010.  
15 568 **5**(10): p. e13609.  
16 569 39. Imamura, F., et al., *Consumption of sugar sweetened beverages, artificially sweetened*  
17 570 *beverages, and fruit juice and incidence of type 2 diabetes: systematic review, meta-analysis,*  
18 571 *and estimation of population attributable fraction*. *BMJ*, 2015. **351**: p. h3576.  
19 572 40. Gao, X.C., G. Forman, J. P. Ascherio, A. Choi, H. K., *Vitamin C intake and serum uric acid*  
20 573 *concentration in men*. *Journal of Rheumatology*, 2008. **35**(9): p. 1853-8.  
21 574 41. Jia, X., et al., *Consumption of citrus and cruciferous vegetables with incident type 2 diabetes*  
22 575 *mellitus based on a meta-analysis of prospective study*. *Prim. Care Diabetes*, 2016.  
23 576 42. Du, H., et al., *Fresh Fruit Consumption and Major Cardiovascular Disease in China*. *N. Engl. J.*  
24 577 *Med.*, 2016. **374**(14): p. 1332-1343.  
25 578 43. Li, B., et al., *Fruit and Vegetables Consumption and Risk of Hypertension: A Meta-Analysis*.  
26 579 *Journal of Clinical Hypertension*, 2016. **18**(5): p. 468-476.  
27 580 44. Aune, D., et al., *Fruit and vegetable intake and the risk of cardiovascular disease, total cancer*  
28 581 *and all-cause mortality—a systematic review and dose-response meta-analysis of prospective*  
29 582 *studies*. *International Journal of Epidemiology*, 2016.  
30 583 45. Li, M., et al., *Fruit and vegetable intake and risk of type 2 diabetes mellitus: meta-analysis of*  
31 584 *prospective cohort studies*. *BMJ open*, 2014. **4**(11): p. e005497.  
32 585 46. Wang, X., et al., *Fruit and vegetable consumption and mortality from all causes, cardiovascular*  
33 586 *disease, and cancer: systematic review and dose-response meta-analysis of prospective cohort*  
34 587 *studies*. *BMJ*, 2014. **349**: p. g4490.  
35 588 47. Wu, L., D. Sun, and Y. He, *Fruit and vegetables consumption and incident hypertension: dose-*  
36 589 *response meta-analysis of prospective cohort studies*. *Journal of human hypertension*, 2016.  
37 590 **30**(10): p. 573.  
38 591 48. Lyu, L.-C., et al., *A case-control study of the association of diet and obesity with gout in Taiwan*.  
39 592 *The American journal of clinical nutrition*, 2003. **78**(4): p. 690-701.  
40 593 49. Liu, L., et al., *Relationship between lifestyle choices and hyperuricemia in Chinese men and*  
41 594 *women*. *Clinical rheumatology*, 2013. **32**(2): p. 233-239.  
42 595 50. Saag, K.G. and H. Choi, *Epidemiology, risk factors, and lifestyle modifications for gout*. *Arthritis*  
43 596 *Res Ther*, 2006. **8 Suppl 1**: p. S2.  
44 597 51. Choi, H.K., *A prescription for lifestyle change in patients with hyperuricemia and gout*. *Curr*  
45 598 *Opin Rheumatol*, 2010. **22**(2): p. 165-72.  
46  
47  
48  
49  
50  
51  
52  
53  
54  
55  
56  
57  
58  
59  
60

- 1  
2 599 52. Gao, X.Q., L. Qiao, N. Choi, H. K. Curhan, G. Tucker, K. L. Ascherio, A., *Intake of added sugar*  
3 600 *and sugar-sweetened drink and serum uric acid concentration in US men and women.*  
4 601 Hypertension, 2007. **50**(2): p. 306-312.  
5 602 53. Zykova, S.N., et al., *Cross-sectional analysis of nutrition and serum uric acid in two Caucasian*  
6 603 *cohorts: the AusDiab Study and the Tromsø study.* 2015. **14**(1): p. 49.  
7 604 54. Reginato, A.M., et al., *The genetics of hyperuricaemia and gout.* Nat Rev Rheumatol, 2012.  
8 605 **8**(10): p. 610-21.  
9 606 55. Sievenpiper, J.L. and P.D. Dworatzek, *Food and dietary pattern-based recommendations: an*  
10 607 *emerging approach to clinical practice guidelines for nutrition therapy in diabetes.* Can J  
11 608 Diabetes, 2013. **37**(1): p. 51-7.  
12 609 56. Peixoto, M.R., et al., *Diet and medication in the treatment of hyperuricemia in hypertensive*  
13 610 *patients.* Arq Bras Cardiol, 2001. **76**(6): p. 463-72.  
14 611 57. Andrews, J., et al., *GRADE guidelines: 14. Going from evidence to recommendations: the*  
15 612 *significance and presentation of recommendations.* J Clin Epidemiol, 2013. **66**(7): p. 719-25.  
16 613 58. Rai, S.K., et al., *Trends in Gout and Rheumatoid Arthritis Hospitalizations in Canada from 2000-*  
17 614 *2011.* Arthritis Care and Research, 2016.  
18 615 59. Arromdee, E., et al., *Epidemiology of gout: is incidence rising?* Journal of Rheumatology, 2002.  
19 616 **29**: p. 2403-2306.  
20 617 60. Zhu, Y., B.J. Pandya, and H.K. Choi, *Prevalence of gout and hyperuricemia in the US general*  
21 618 *population: the National Health and Nutrition Examination Survey 2007-2008.* Arthritis Rheum,  
22 619 2011. **63**(10): p. 3136-41.  
23 620 61. Wallace, K.L., et al., *Increasing prevalence of gout and hyperuricemia over 10 years among*  
24 621 *older adults in a managed care population.* J Rheumatol, 2004. **31**(8): p. 1582-7.  
25 622 62. Harris, C.M., D.C. Lloyd, and J. Lewis, *The prevalence and prophylaxis of gout in England.* J Clin  
26 623 Epidemiol, 1995. **48**(9): p. 1153-8.  
27 624 63. Klemp, P., et al., *Gout is on the increase in New Zealand.* Ann Rheum Dis, 1997. **56**(1): p. 22-6.  
28 625 64. Canada, S. *The 10 leading causes of death, 2011.* 2015 2015-11-27 [cited 2016 4th of  
29 626 November]; Available from: [http://www.statcan.gc.ca/pub/82-625-x/2014001/article/11896-](http://www.statcan.gc.ca/pub/82-625-x/2014001/article/11896-eng.htm)  
30 627 [eng.htm](http://www.statcan.gc.ca/pub/82-625-x/2014001/article/11896-eng.htm).  
31 628  
32 629  
33 630  
34 631  
35 632  
36 633  
37 634  
38 635  
39 636  
40 637  
41 638  
42  
43  
44  
45  
46  
47  
48  
49  
50  
51  
52  
53  
54  
55  
56  
57  
58  
59  
60

1  
2 639 **TABLES AND FIGURES**  
3

4 640  
5  
6 641 **Figure 1** Summary of evidence search and selection. Flow of the literature search for the effect of food  
7 642 sources of sugar intake on incident gout and hyperuricemia. Of the 309 studies initially identified, 294  
8 643 were excluded based on title and/or abstract. The remainder were read in full by two independent  
9 644 reviewers; after, 12 were further excluded. Included in this analysis were three prospective cohort  
10 645 studies.  
11  
12

13 646  
14  
15 647 **Figure 2** Relation between intake of fruit, fruit juice and SSB incident gout. Estimates from most-  
16 648 adjusted multivariate models accounting for food sources of fructose-containing sugars intake were  
17 649 used. The diamond represents the pooled effect estimate. Interstudy heterogeneity was tested using  
18 650 the Cochran Q statistic and quantified using the  $I^2$  statistic ( $I^2 \geq 50\%$  indicative of significant  
19 651 heterogeneity). All results are presented as RR with 95% CI. OJ = orange juice. Other = other fruit juices.  
20 652 \* The number of cases and participants are divided equally between the multiple entries of the study  
21 653 to ensure total count gives unique individuals. To overcome a unit-of-analysis error for studies  
22 654 appearing more than once in the same analysis, we readjusted the log-standard errors to participants  
23 655 equally among the multiple comparisons and.  
24  
25  
26  
27  
28  
29  
30  
31  
32

**Table 1** Characteristics of prospective cohort studies investigating food sources of fructose-containing sugar intake and incident gout.

| Study, year (Reference)        | Cohort | Country | Participants | Incident Cases | Age (mean years, range) | Follow-up (mean, range) | Dietary Assessment | Food source of fructose-containing sugars | Frequency of Administration of SFFQ | Quantiles | Exposure (servings/week, mean, range) | Serving size | Outcome assessment | Funding Source*     |
|--------------------------------|--------|---------|--------------|----------------|-------------------------|-------------------------|--------------------|-------------------------------------------|-------------------------------------|-----------|---------------------------------------|--------------|--------------------|---------------------|
| Choi <i>et al.</i> , 2008 (26) | HPFS   | USA     | 46,393 (M)   | 755            | 52.5 (40 to 75)         | 12 years                | Validated SFFQ     | SSBs<br>Fruit Juice<br>Fruit              | 4                                   | Quintiles | ¼ to ≥14                              | Not reported | Record linkage     | Agency and Industry |
| Choi <i>et al.</i> , 2010 (27) | NHS    | USA     | 78,906 (F)   | 778            | 49 (30 to 55)           | 22 years                | Validated SFFQ     | SSBs<br>Fruit Juice                       | 4                                   | Sextiles  | ¼ to ≥14                              | Not reported | Self-reported      | Agency              |
| Williams, 2008 (28)            | NRHS   | USA     | 28,990 (M)   | 228            | 44.9                    | 7.7 years (5.9 to 9.6)  | Validated SFFQ     | Fruit                                     | 1 (baseline)                        | Quartiles | ¼ to 2 (0 to ≥2)                      | Not reported | Self-reported      | Agency              |

Abbreviations: HPFS = Health Professionals Follow-Up Study; NHS = Nurses Health Study; NRHS =National Runner’s Health Study; M=males; F=females; SFFQ = Semi quantitative Food-Frequency Questionnaire; SSBs = Sugar Sweetened Beverages.

\*Agency funding is that from government, university or not-for-profit health agency sources.

684 **Table 2** GRADE assessment of individual food source of fructose-containing sugars.

| Certainty assessment                                                          |                       |                         |                                         |                                   |                        |                         |                                                                      | Study event rates (%) | Effect                 | Certainty                                                                                                                                |
|-------------------------------------------------------------------------------|-----------------------|-------------------------|-----------------------------------------|-----------------------------------|------------------------|-------------------------|----------------------------------------------------------------------|-----------------------|------------------------|------------------------------------------------------------------------------------------------------------------------------------------|
| No. of studies                                                                | Design                | Risk of bias            | Inconsistency                           | Indirectness                      | Imprecision            | Publication bias        | Other considerations                                                 |                       | Relative Risk (95% CI) |                                                                                                                                          |
| Sugar sweetened beverages intake on incident gout (follow-up median 17 years) |                       |                         |                                         |                                   |                        |                         |                                                                      |                       |                        |                                                                                                                                          |
| 2                                                                             | Observational studies | No serious risk of bias | No serious inconsistency                | Serious indirectness <sup>1</sup> | No serious imprecision | Undetected <sup>2</sup> | Large magnitude of effect <sup>3</sup><br>Dose-response <sup>4</sup> | 1,533/125,299 (1.22%) | 2.08 [1.40, 3.07]      | ⊕⊕⊕○<br><b>Moderate</b> <sup>1,2,3,4</sup><br>Due to downgrade for indirectness and upgrade for large magnitude effect and dose-response |
| Fruit juice intake on incident gout (follow-up median 17 years)               |                       |                         |                                         |                                   |                        |                         |                                                                      |                       |                        |                                                                                                                                          |
| 2                                                                             | Observational studies | No serious risk of bias | No serious inconsistency                | Serious indirectness <sup>1</sup> | No serious imprecision | Undetected <sup>2</sup> | None                                                                 | 1,533/125,299 (1.22%) | 1.73 [1.17, 2.57]      | ⊕○○○<br><b>Very low</b> <sup>1,2</sup><br>Due to downgrade for indirectness                                                              |
| Fruit intake on incident gout (follow-up median 9.87 years)                   |                       |                         |                                         |                                   |                        |                         |                                                                      |                       |                        |                                                                                                                                          |
| 2                                                                             | Observational studies | No serious risk of bias | Very serious inconsistency <sup>5</sup> | Serious indirectness <sup>1</sup> | Serious <sup>6</sup>   | Undetected <sup>2</sup> | None                                                                 | 983/75,383 (1.3%)     | 0.89 [0.27, 2.87]      | ⊕○○○<br><b>Very low</b> <sup>1,2,5,6</sup><br>Due to downgrade for inconsistency, indirectness and imprecision                           |

685 <sup>1</sup>Downgrade for indirectness, as the study population is specific to a group of the population like professionals, nurses or runners.

686 <sup>2</sup>No downgrade for publication bias, as publication bias could not be assessed due to lack of power for assessing funnel plot asymmetry  
687 and small study effect (<10 cohort included in our meta-analysis).

688 <sup>3</sup>Upgrade for a large magnitude of effect (RR>2.0).



1  
2 689 <sup>4</sup>Upgrade for a dose response gradient, as the GLST dose-response analysis revealed a significant linear relationship between sugar  
3  
4 690 sweetened beverage intake and incident gout (P=0.0001).

5  
6 691 <sup>5</sup>Downgrade for very serious inconsistency, as the two studies included had opposite associations and there was evidence of substantial  
7  
8 692 inter-study heterogeneity ( $I^2=94%$ ,  $p<0.0001$ ). Due to the small number of studies included in the analysis, subgroup analysis was not  
9  
10 693 performed.

11 694 <sup>6</sup>Downgrade for serious imprecision, as the lower bound of the 95% CI (RR, 0.27) includes clinically important benefit (RR<0.9), while the  
12  
13 695 upper bound of the 95% CI (RR, 2.87) crosses the minimally important difference of 10% (RR>1.1).  
14  
15  
16  
17  
18  
19  
20  
21  
22  
23  
24  
25  
26  
27  
28  
29  
30  
31  
32  
33  
34  
35  
36  
37  
38  
39  
40  
41  
42  
43  
44  
45  
46  
47

1  
2  
3  
4  
5  
6  
7  
8  
9  
10  
11  
12  
13  
14  
15  
16  
17  
18  
19  
20  
21  
22  
23  
24  
25  
26  
27  
28  
29  
30  
31  
32  
33  
34  
35  
36  
37  
38  
39  
40  
41  
42  
43  
44  
45  
46  
47  
48  
49  
50  
51  
52  
53  
54  
55  
56  
57  
58  
59  
60

Figure 1 Summary of evidence search and selection



Figure 1 Summary of evidence search and selection

215x279mm (300 x 300 DPI)

Figure 2 Relation between intake of fruit, fruit juice and SSB incident gout.

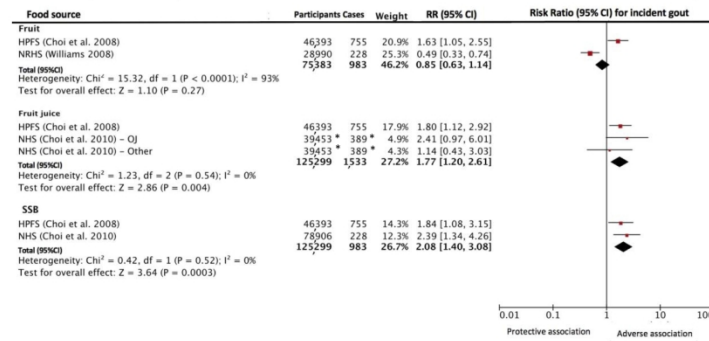

Figure 2 Relation between intake of fruit, fruit juice and SSB incident gout.

215x279mm (300 x 300 DPI)

**Supplementary material****SUPPLEMENTARY TABLES****Supplementary table 1** Search terms**Supplementary table 2** Analysis of confounding variables among 3 studies of food sources of sugar intake and incident gout**Supplementary table 3** Newcastle-Ottawa Scale (NOS) for assessing the quality of cohort studies**SUPPLEMENTARY FIGURES****Supplementary figure 1** Linear and non-linear dose-response relationship between fruit juice intake and incident gout per serving/week**Supplementary figure 2** Linear and non-linear dose-response relationship between SSB intake and incident gout per serving/week**Supplementary table 1.** Search terms

**Database and search terms****MEDLINE**

1. sugar\*.mp.
2. exp fructose/
3. fructose.mp.
4. HFCS.mp.
5. exp high fructose Corn Syrup/
6. sucrose.mp.
7. exp dietary Sucrose/
8. sugar sweetened beverage\*.mp.
9. ssb.mp.
10. soda.mp.
11. soft drink\*.mp.
12. exp carbonated beverages/
13. carbonated beverages.mp.
14. non alcoholic beverage\*.mp.
15. nonalcoholic beverage\*.mp.
16. exp energy drinks/
17. energy drink\*.mp.
18. smoothie\*.mp.
19. exp "fruit and vegetable juices"/
20. fruit.mp.
21. exp fruit/
22. exp honey/
23. y\*g\*rt.mp.
24. exp yogurt/
25. ice cream\*.mp.
26. icecream\*.mp.
27. exp ice cream/
28. exp edible grain/
29. cereal\*.mp.
30. dessert\*.mp.
31. sweets.mp.
32. confection\*.mp.
33. pastries.mp.
34. biscuit\*.mp.
35. cookie\*.mp.
36. cake\*.mp.
37. candy.mp.
38. candies\*.mp.
39. exp candy/
40. (chocolate adj2 milk).mp.
41. chocolate.mp
42. exp chocolate/
43. cacao.mp
44. exp cacao/
45. cohort.mp.
46. exp prospective study/
47. (prospective adj2 (cohort or study)).mp.
48. exp multivariate analysis/
49. exp follow up studies/
50. exp proportional hazards models/
51. follow-up study.mp.
52. (longitudinal adj2 study).mp.
53. gout/
54. gout\*.mp.
55. uric acid\*.mp.

**EMBASE**

1. sugar\*.mp.
2. exp sugar/
3. exp fructose/
4. fructose.mp.
5. HFCS.mp.
6. exp high fructose Corn Syrup/
7. sucrose.mp.
8. exp dietary Sucrose/
9. sugar sweetened beverage\*.mp.
10. SSB.mp.
11. soda.mp.
12. soft drink\*.mp.
13. exp soft drink/
14. exp carbonated beverages/
15. carbonated beverages.mp.
16. non alcoholic beverage\*.mp.
17. nonalcoholic beverage\*.mp.
18. exp energy drinks/
19. energy drink\*.mp.
20. smoothie\*.mp.
21. exp "fruit and vegetable juices"/
22. fruit.mp.
23. exp fruit/
24. exp honey/
25. y\*g\*rt.mp.
26. exp yoghurt/
27. ice cream\*.mp.
28. icecream\*.mp.
29. exp ice cream/
30. cereal\*.mp.
31. dessert\*.mp.
32. sweets.mp.
33. confection\*.mp.
34. exp bakery product/
35. pastries.mp.
36. biscuit\*.mp.
37. cookie\*.mp.
38. cake\*.mp.
39. candy.mp.
40. candies\*.mp.
41. chocolate.mp
42. exp chocolate/
43. cacao.mp
44. exp cacao/
45. (chocolate adj2 milk).mp.
46. cohort.mp.
47. exp prospective study/
48. (prospective adj2 (cohort or study)).mp.
49. exp multivariate analysis/
50. exp proportional hazards models/
51. follow-up study.mp.
52. (longitudinal adj2 study).mp.
53. gout/
54. gout\*.mp.
55. uric acid\*.mp.

**Cochrane**

1. sugar\*.mp.
2. exp fructose/
3. fructose.mp.
4. HFCS.mp.
5. exp Nutritive Sweeteners/
6. sucrose.mp.
7. exp dietary sucrose/
8. sugar sweetened beverage\*.mp.
9. ssb.mp.
10. soda.mp.
11. soft drink\*.mp.
12. exp carbonated beverages/
13. non alcoholic beverage\*.mp.
14. nonalcoholic beverage\*.mp.
15. exp energy drinks/
16. energy drink\*.mp.
17. smoothie\*.mp.
18. ((fruit or vegetable) and juice\*).mp.
19. fruit.mp.
20. exp fruit/
21. exp honey/
22. y\*g\*rt.mp.
23. exp yogurt/
24. ice cream\*.mp.
25. icecream\*.mp.
26. exp ice cream/
27. cereal\*.mp.
28. dessert\*.mp.
29. sweets.mp.
30. confection\*.mp.
31. pastries.mp.
32. biscuit\*.mp.
33. cookie\*.mp.
34. cake\*.mp.
35. candy.mp.
36. candies.mp.
37. exp candy/
38. (chocolate adj2 milk).mp.
39. cohort.mp.
40. exp Prospective Studies/
41. chocolate.mp
42. cacao.mp
43. exp cacao/
44. (prospective adj2 (cohort or study)).mp.
45. exp follow-up studies/
46. exp multivariate analysis/
47. exp proportional hazards models/
48. follow up study.mp.
49. (longitudinal adj2 study).mp.
50. gout/
51. gout\*.mp
52. uric acid\*.mp
53. hyperuricemia\*.mp
54. hyperuricemia/
55. hyperuricaemia\*.mp

1  
2  
3 56. hyperuricemia\*.mp. 56. hyperuricemia\*.mp. 56. uric.mp  
4 57. hyperuricemia/ 57. hyperuricemia/ 57. or/1-43  
5 58. hyperuricaemia\*.mp. 58. hyperuricaemia\*.mp. 58. or/44-49  
6 59. uric.mp. 59. uric.mp. 59. or/50-56  
7 60. or/1-44 60. or/1-45 60. and/57-59  
8 61. or/45-52 61. or/46-52  
9 62. or/53-59 62. or/53-59  
10 63. and/60-62 63. and/60-62

| Database                     | Total |
|------------------------------|-------|
| MEDLINE: September 13, 2017  | 81    |
| EMBASE: September 13, 2017   | 202   |
| Cochrane: September 13, 2017 | 19    |
| Manual search                | 7     |
| Total                        | 309   |

11  
12  
13  
14  
15  
16  
17  
18 For all databases, the original search was September 13, 2017.  
19  
20  
21  
22  
23  
24  
25  
26  
27  
28  
29  
30  
31  
32  
33  
34  
35  
36  
37  
38  
39  
40  
41  
42  
43  
44  
45  
46  
47  
48  
49  
50  
51  
52  
53  
54  
55  
56  
57  
58  
59  
60

**Supplementary table 2.** Analysis of confounding variables among 3 studies of food sources of sugar intake and incident gout

| Study                                                                                           | HPFS (Choi <i>et al.</i> , 2008) | NRHS (Williams, 2008) | NHS (Choi <i>et al.</i> , 2010) |
|-------------------------------------------------------------------------------------------------|----------------------------------|-----------------------|---------------------------------|
| Number of variables in fully adjusted model                                                     | 14                               | 6                     | 14                              |
| Number of multivariable models presented                                                        | 2                                | 1                     | 3                               |
| Timing of measurement of confounding variables                                                  | 2y                               | BL*                   | 2y                              |
| <b>Pre-specified primary confounding variable</b>                                               |                                  |                       |                                 |
| Age                                                                                             | ✓                                | ✓                     | ✓                               |
| <b>Pre-specified secondary confounding variables</b>                                            |                                  |                       |                                 |
| Marker of overweight/obesity (Body mass index, weight, waist circumference, waste to hip ratio) | ✓                                |                       | ✓                               |
| Sex                                                                                             | M §                              | M §                   | F ‡                             |
| History of gout/hyperuricemia                                                                   |                                  |                       |                                 |
| Diabetes                                                                                        |                                  |                       |                                 |
| Physical activity                                                                               |                                  |                       |                                 |
| Lipid medication/dyslipidemia                                                                   |                                  |                       |                                 |
| Animal protein intake                                                                           | ✓                                |                       | ✓                               |
| Hypertension or blood pressure medication including diuretics                                   | ✓                                |                       | ✓                               |
| <b>Other confounding variables</b>                                                              |                                  |                       |                                 |
| <b>Lifestyle factors</b>                                                                        |                                  |                       |                                 |
| Weekly intake of:                                                                               |                                  |                       |                                 |
| Alcohol                                                                                         | ✓                                | ✓                     | ✓                               |
| Seafood                                                                                         | ✓                                |                       | ✓                               |
| Purine from vegetables                                                                          | ✓                                |                       | ✓                               |
| Dairy food                                                                                      | ✓                                |                       | ✓                               |
| Vitamin C                                                                                       | ✓                                |                       | ✓                               |
| Coffee                                                                                          |                                  | ✓                     |                                 |
| Meat                                                                                            |                                  | ✓                     |                                 |
| Fish                                                                                            |                                  |                       | ✓∇                              |
| Diet soda                                                                                       | ✓∇                               |                       | ✓∇                              |
| Sugar-sweetened cola                                                                            | ✓∇                               |                       | ✓∇                              |
| Other soda                                                                                      | ✓∇                               |                       | ✓∇                              |
| Orange or apple juice                                                                           | ✓∇                               |                       | ✓∇                              |
| Other fruit juice                                                                               |                                  |                       | ✓∇                              |
| Orange or apple                                                                                 | ✓∇                               |                       |                                 |
| Total energy                                                                                    | ✓                                |                       | ✓                               |
| Weekly intake of aspirin                                                                        |                                  | ✓                     |                                 |
| <b>Medical history</b>                                                                          |                                  |                       |                                 |
| History of Hypertension                                                                         | ✓                                | ✓                     | ✓                               |
| History of chronic Renal failure                                                                | ✓                                |                       |                                 |
| Menopause status                                                                                |                                  |                       | ✓                               |
| Use of hormonal therapy                                                                         |                                  |                       | ✓                               |

HPFS=Health Professionals Follow-Up Study, NHS=Nurses Health Study

\*Denotes confounders measured only at baseline years.

† Indicates confounders measured every 2 years.

‡ Indicates the study includes only female subjects

§ Indicates the study includes only male subjects

∇ Indicates the confounder was present in some, but not all, models.

**Supplementary table 3.** Newcastle-Ottawa Scale (NOS) for assessing the quality of cohort studies

| Study                     | Selection* | Outcome† | Comparability‡ | total§ |
|---------------------------|------------|----------|----------------|--------|
| Choi <i>et al.</i> , 2008 | 2          | 3        | 1              | 6      |
| Williams, 2008            | 2          | 2        | 1              | 5      |
| Choi <i>et al.</i> , 2010 | 2          | 3        | 1              | 6      |

\*Maximum 4 points awarded for cohort representativeness, selection of non-exposed cohort, exposure assessment and demonstration outcome not present at baseline.

†Maximum 3 points awarded for follow-up length, adequacy of follow-up and outcome assessment.

‡Maximum 2 points awarded for controlling for the pre-specified primary confounding variable (age) and >6 of the secondary confounding variables (sex, body mass index, history of gout or hyperuricemia, diabetes, alcohol, physical activity, lipid medication/dyslipidemia, animal protein intake, hypertension or blood pressure medication including diuretics).

§A maximum of 9 points could be awarded.



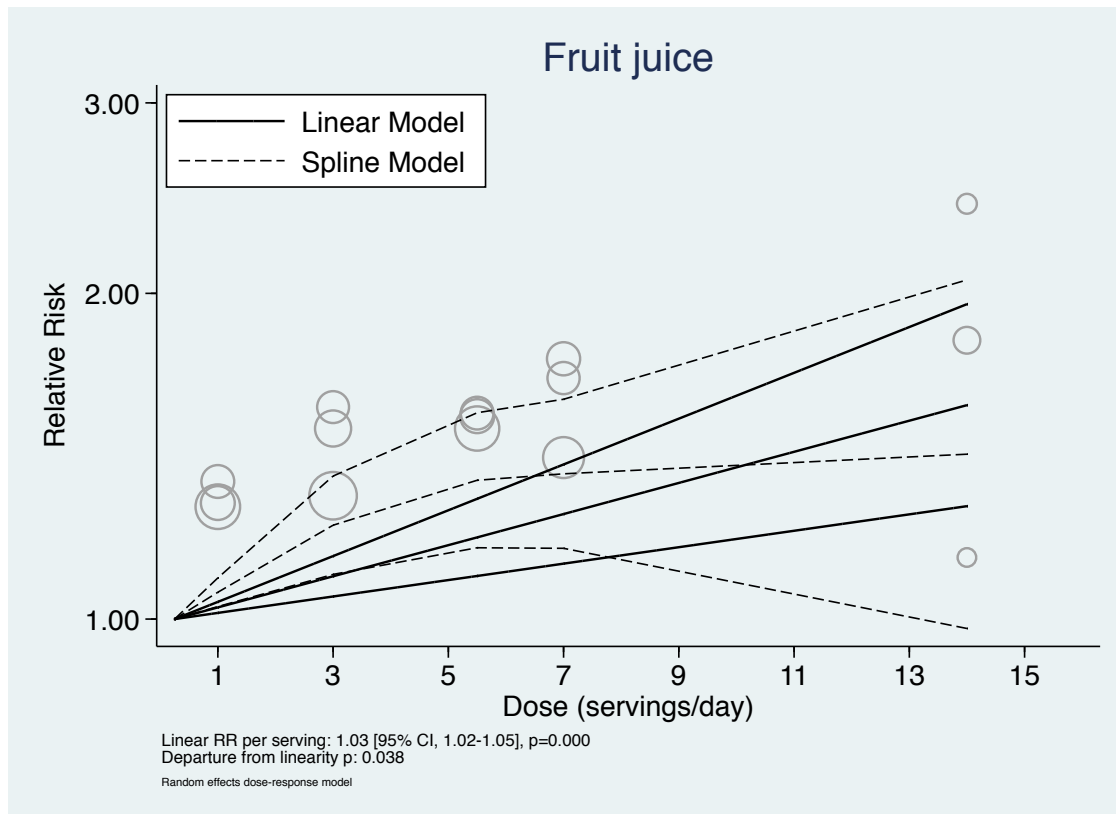

**Supplementary figure 1.** Linear and non-linear dose-response relationship between fruit juice intake and incident gout per serving/week. Linear dose response data (solid lines) were modeled using the generalized least squares trend estimation models (GLST). Non-linear dose response data (dashed lines) were modeled with fixed-effects restricted cubic spline models with 3 knots. 95% confidence interval for the fitted trend are shown above and below the solid line. Each study was centered to its own baseline reference dose when estimating increasing dose risk.

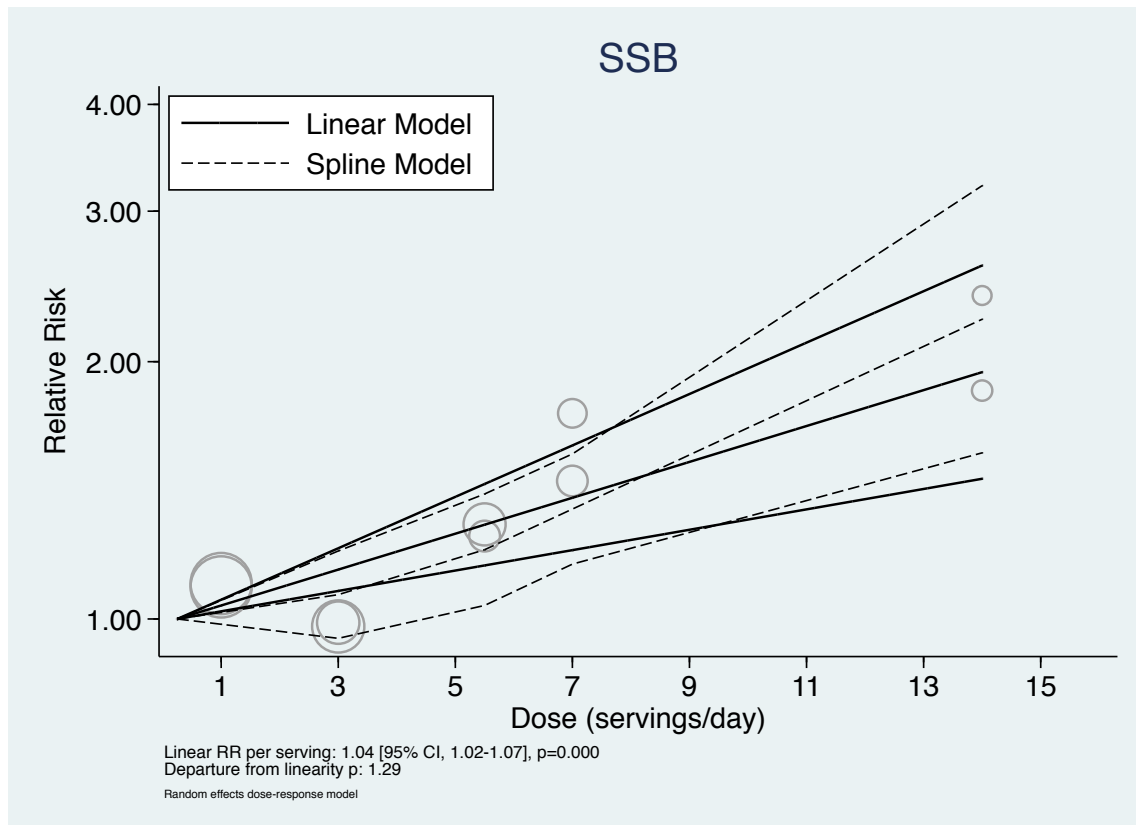

28 **Supplementary figure 2.** Linear and non-linear dose-response relationship between SSB intake and  
29 incident gout per serving/week. Linear dose response data (solid lines) were modeled using the  
30 generalized least squares trend estimation models (GLST). Non-linear dose response data (dashed lines)  
31 were modeled with fixed-effects restricted cubic spline models with 3 knots. 95% confidence interval  
32 for the fitted trend are shown above and below the solid line. Each study was centered to its own  
33 baseline reference dose when estimating increasing dose risk.  
34

## MOOSE Checklist for Meta-analyses of Observational Studies

| Item No                                     | Recommendation                                                                                                                                                                                                                                                               | Reported on Page No      |
|---------------------------------------------|------------------------------------------------------------------------------------------------------------------------------------------------------------------------------------------------------------------------------------------------------------------------------|--------------------------|
| Reporting of background should include      |                                                                                                                                                                                                                                                                              |                          |
| 1                                           | Problem definition                                                                                                                                                                                                                                                           | 4                        |
| 2                                           | Hypothesis statement                                                                                                                                                                                                                                                         | -                        |
| 3                                           | Description of study outcome(s)                                                                                                                                                                                                                                              | 4, 5                     |
| 4                                           | Type of exposure or intervention used                                                                                                                                                                                                                                        | 5                        |
| 5                                           | Type of study designs used                                                                                                                                                                                                                                                   | 5                        |
| 6                                           | Study population                                                                                                                                                                                                                                                             | 5                        |
| Reporting of search strategy should include |                                                                                                                                                                                                                                                                              |                          |
| 7                                           | Qualifications of searchers (eg, librarians and investigators)                                                                                                                                                                                                               | 5, Title page            |
| 8                                           | Search strategy, including time period included in the synthesis and key words                                                                                                                                                                                               | 5, supplementary table 1 |
| 9                                           | Effort to include all available studies, including contact with authors                                                                                                                                                                                                      | 5                        |
| 10                                          | Databases and registries searched                                                                                                                                                                                                                                            | 5                        |
| 11                                          | Search software used, name and version, including special features used (eg, explosion)                                                                                                                                                                                      | 6                        |
| 12                                          | Use of hand searching (eg, reference lists of obtained articles)                                                                                                                                                                                                             | 5                        |
| 13                                          | List of citations located and those excluded, including justification                                                                                                                                                                                                        | 7, 8, Fig 1              |
| 14                                          | Method of addressing articles published in languages other than English                                                                                                                                                                                                      | -                        |
| 15                                          | Method of handling abstracts and unpublished studies                                                                                                                                                                                                                         | 5                        |
| 16                                          | Description of any contact with authors                                                                                                                                                                                                                                      | -                        |
| Reporting of methods should include         |                                                                                                                                                                                                                                                                              |                          |
| 17                                          | Description of relevance or appropriateness of studies assembled for assessing the hypothesis to be tested                                                                                                                                                                   | 7-9                      |
| 18                                          | Rationale for the selection and coding of data (eg, sound clinical principles or convenience)                                                                                                                                                                                | 5                        |
| 19                                          | Documentation of how data were classified and coded (eg, multiple raters, blinding and interrater reliability)                                                                                                                                                               | 5                        |
| 20                                          | Assessment of confounding (eg, comparability of cases and controls in studies where appropriate)                                                                                                                                                                             | 9, supplementary table 2 |
| 21                                          | Assessment of study quality, including blinding of quality assessors, stratification or regression on possible predictors of study results                                                                                                                                   | 9, supplementary table 3 |
| 22                                          | Assessment of heterogeneity                                                                                                                                                                                                                                                  | 6, 7                     |
| 23                                          | Description of statistical methods (eg, complete description of fixed or random effects models, justification of whether the chosen models account for predictors of study results, dose-response models, or cumulative meta-analysis) in sufficient detail to be replicated | 6, 7                     |
| 24                                          | Provision of appropriate tables and graphics                                                                                                                                                                                                                                 | Tables 1, 2, Figs 1, 2   |
| Reporting of results should include         |                                                                                                                                                                                                                                                                              |                          |
| 25                                          | Graphic summarizing individual study estimates and overall estimate                                                                                                                                                                                                          | Figs 2                   |
| 26                                          | Table giving descriptive information for each study included                                                                                                                                                                                                                 | Table 1                  |
| 27                                          | Results of sensitivity testing (eg, subgroup analysis)                                                                                                                                                                                                                       | -                        |

|    |                                                   |             |
|----|---------------------------------------------------|-------------|
| 28 | Indication of statistical uncertainty of findings | 11, table 2 |
|----|---------------------------------------------------|-------------|

| Item No                                 | Recommendation                                                                                                            | Reported on Page No |
|-----------------------------------------|---------------------------------------------------------------------------------------------------------------------------|---------------------|
| Reporting of discussion should include  |                                                                                                                           |                     |
| 29                                      | Quantitative assessment of bias (eg, publication bias)                                                                    | 10, 16              |
| 30                                      | Justification for exclusion (eg, exclusion of non-English language citations)                                             | 5                   |
| 31                                      | Assessment of quality of included studies                                                                                 | 16                  |
| Reporting of conclusions should include |                                                                                                                           |                     |
| 32                                      | Consideration of alternative explanations for observed results                                                            | 11-17               |
| 33                                      | Generalization of the conclusions (ie, appropriate for the data presented and within the domain of the literature review) | 16, 17              |
| 34                                      | Guidelines for future research                                                                                            | 16, 17              |
| 35                                      | Disclosure of funding source                                                                                              | 17, 18              |

From: Stroup DF, Berlin JA, Morton SC, et al, for the Meta-analysis Of Observational Studies in Epidemiology (MOOSE) Group. Meta-analysis of Observational Studies in Epidemiology. A Proposal for Reporting. *JAMA*. 2000;283(15):2008-2012. doi: 10.1001/jama.283.15.2008.
